# Supplementary material for: Coupling of CO2and epoxides catalysed by novelN-fused mesoionic carbene complexes of nickel(ii)
Source: Royal Society of Chemistry journal article supplement (doi:10.1039/d1dt03311e), 2021-01-01
Supplement: d1dt03311e1.pdf [file d1dt03311e1.pdf]

# Coupling of CO<sub>2</sub> and Epoxides Catalysed by Novel *N*-Fused Mesoionic Carbene Complexes of Nickel(II)

Fabian A. Watt,<sup>a†</sup> Benedikt Sieland,<sup>a†</sup> Nicole Dickmann,<sup>a†</sup> Roland Schoch,<sup>a</sup> Regina Herbst-Irmer,<sup>b</sup> Holger Ott,<sup>c</sup> Jan Paradies,<sup>a</sup> Dirk Kuckling<sup>a</sup> and Stephan Hohloch<sup>\*d</sup>

|    |                                |    |
|----|--------------------------------|----|
| 1. | NMR spectra .....              | 2  |
| 2. | IR Spectra .....               | 54 |
| 3. | Crystallographic details ..... | 59 |
| 4. | Literature .....               | 61 |

---

<sup>a</sup> Paderborn University, Faculty of Science, Department of Chemistry, Warburger Straße 100, 33098 Paderborn, Germany.

<sup>b</sup> University of Göttingen, Institute of Inorganic Chemistry, Tammannstraße 4, 37077 Göttingen, Germany

<sup>c</sup> Bruker AXS GmbH, Östliche Rheinbrückenstraße 49, 76187 Karlsruhe, Germany.

<sup>d</sup> University of Innsbruck, Faculty of Chemistry and Pharmacy, Institute of General, Inorganic and Theoretical Chemistry, Innrain 80-82, 6020 Innsbruck

†These authors contributed equally

## 1. NMR spectra

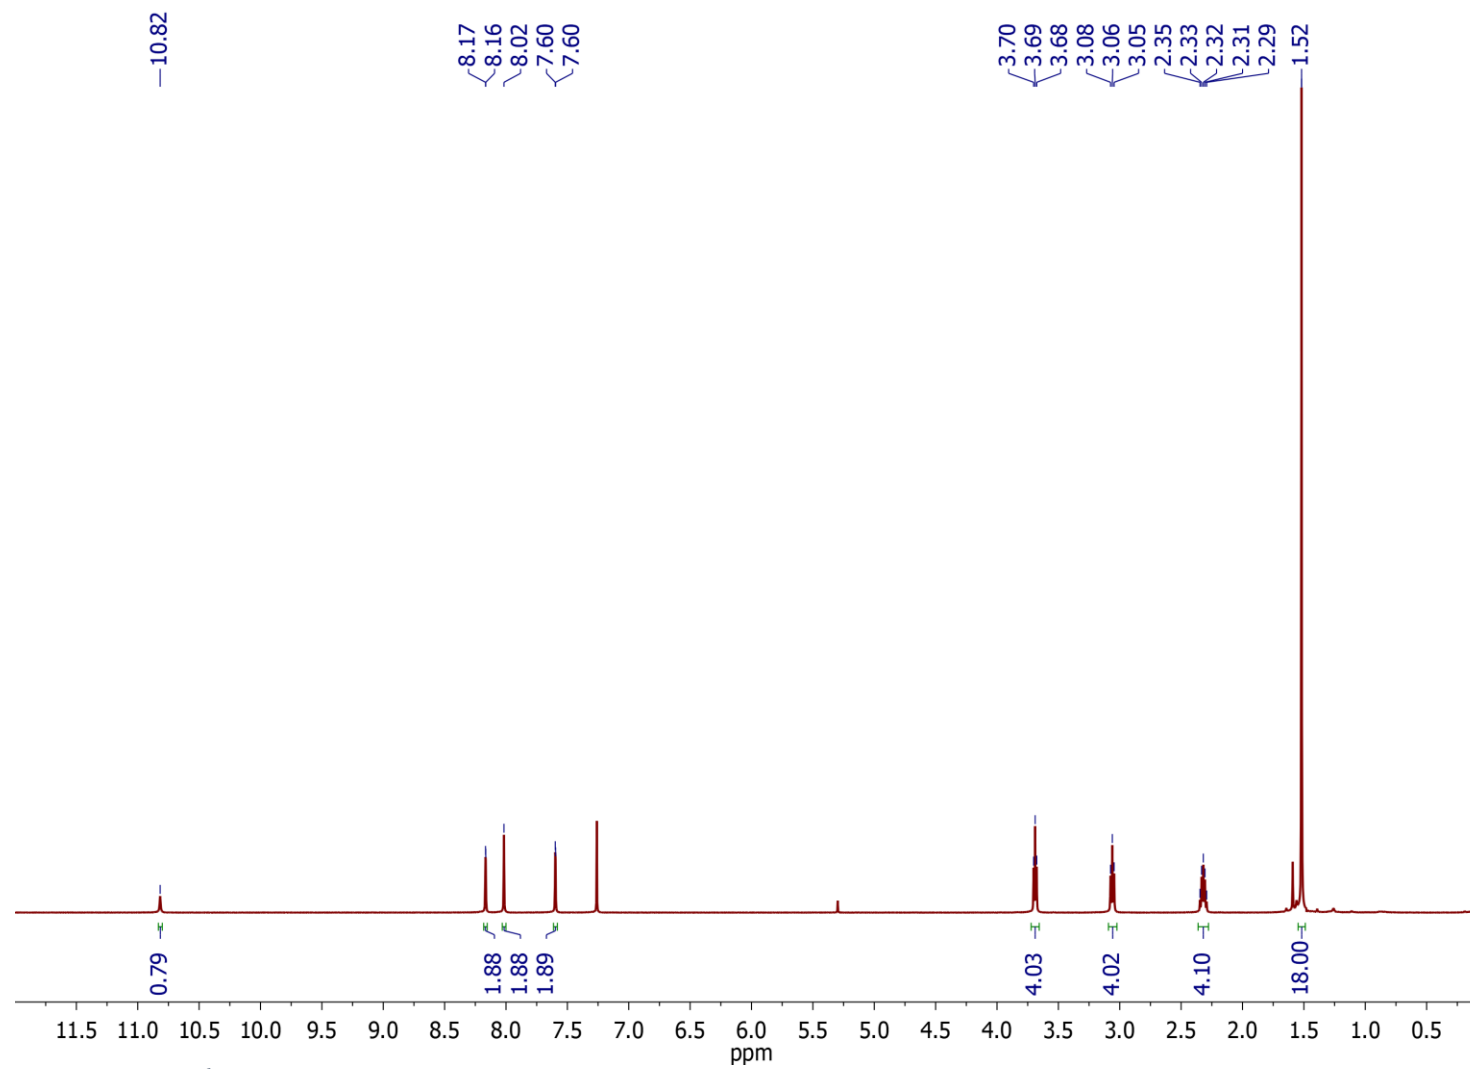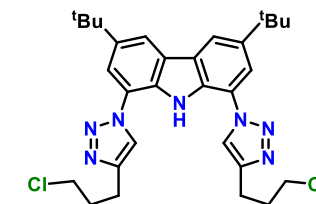

Figure S 1: <sup>1</sup>H NMR of **2a** in CDCl<sub>3</sub> at 298 K. Small impurities of DCM and grease are present.

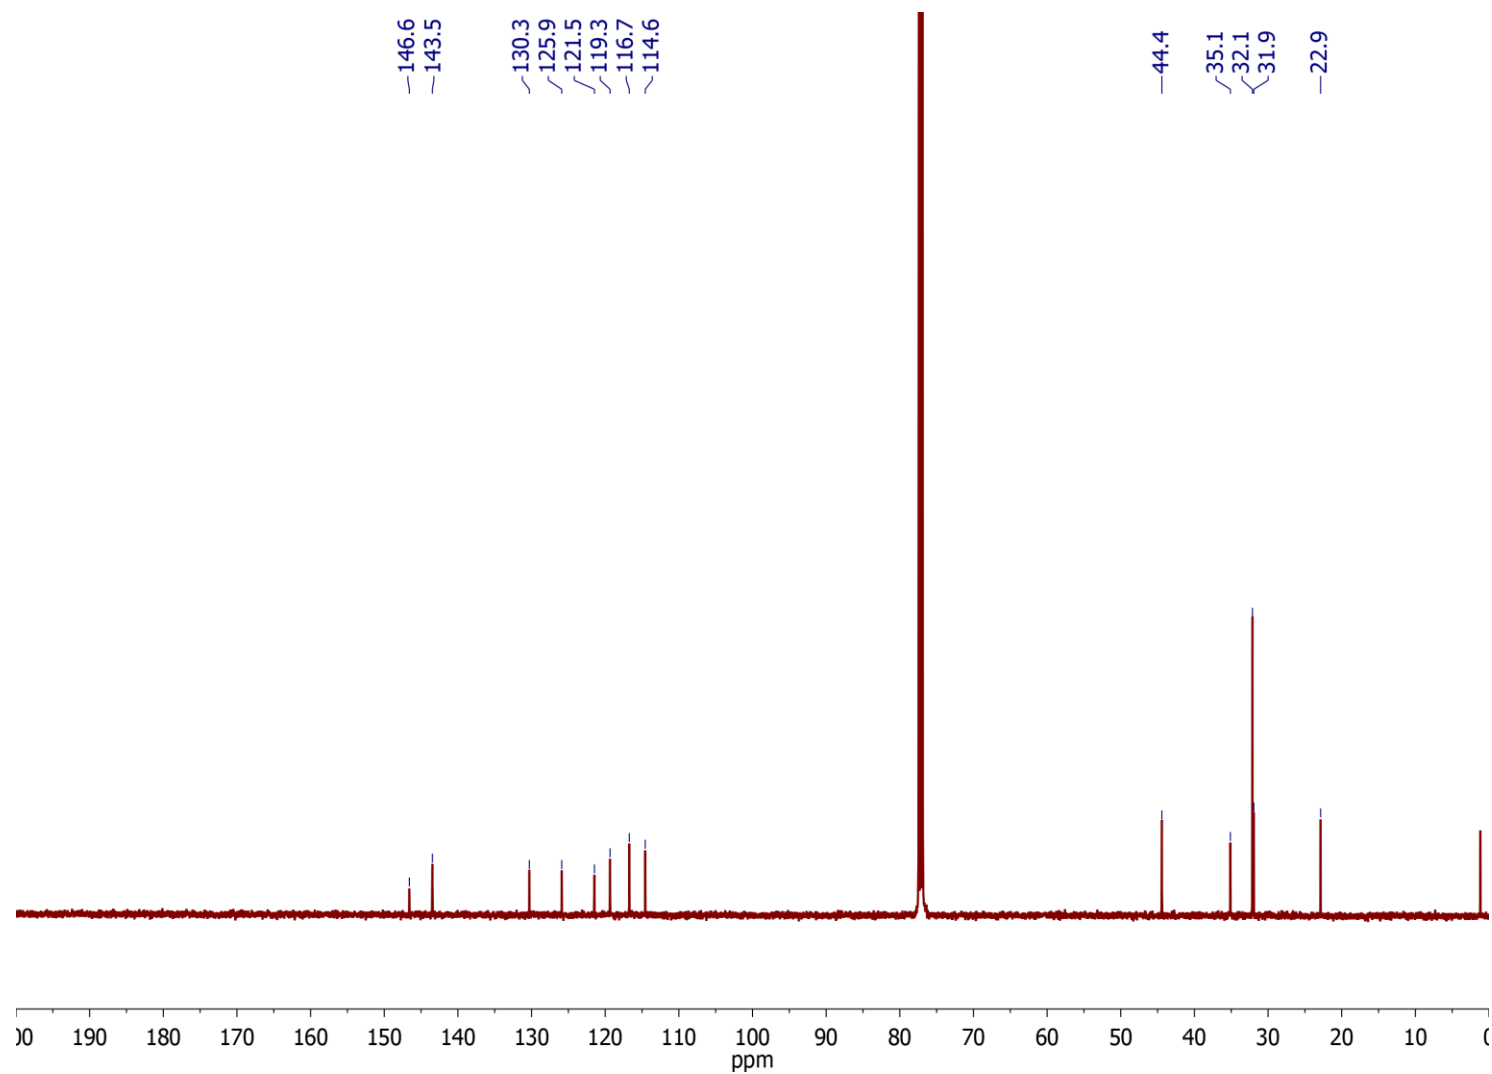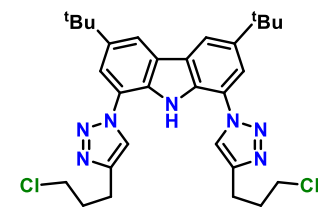

Figure S 2:  $^{13}\text{C}$  NMR of **2a** in  $\text{CDCl}_3$  at 298 K. Signal at 1.2 ppm belongs to grease.

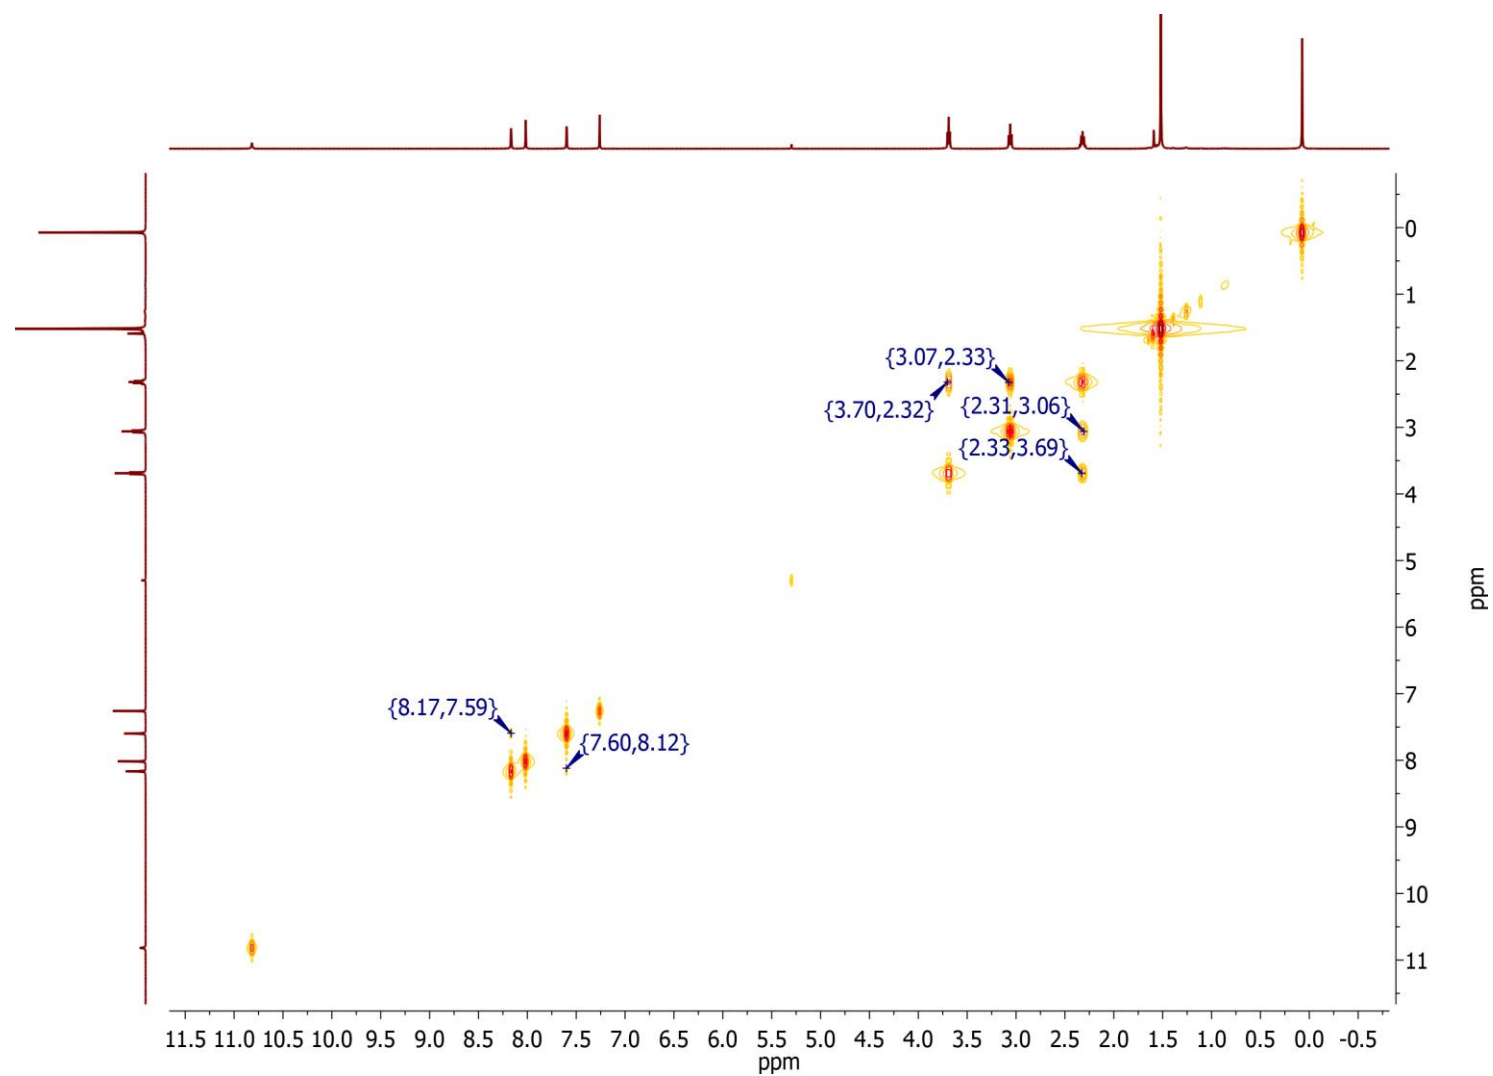

Figure S 3:  $^1\text{H}$ - $^1\text{H}$  COSY of **2a** in  $\text{CDCl}_3$  at 298 K.

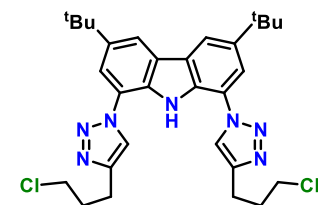

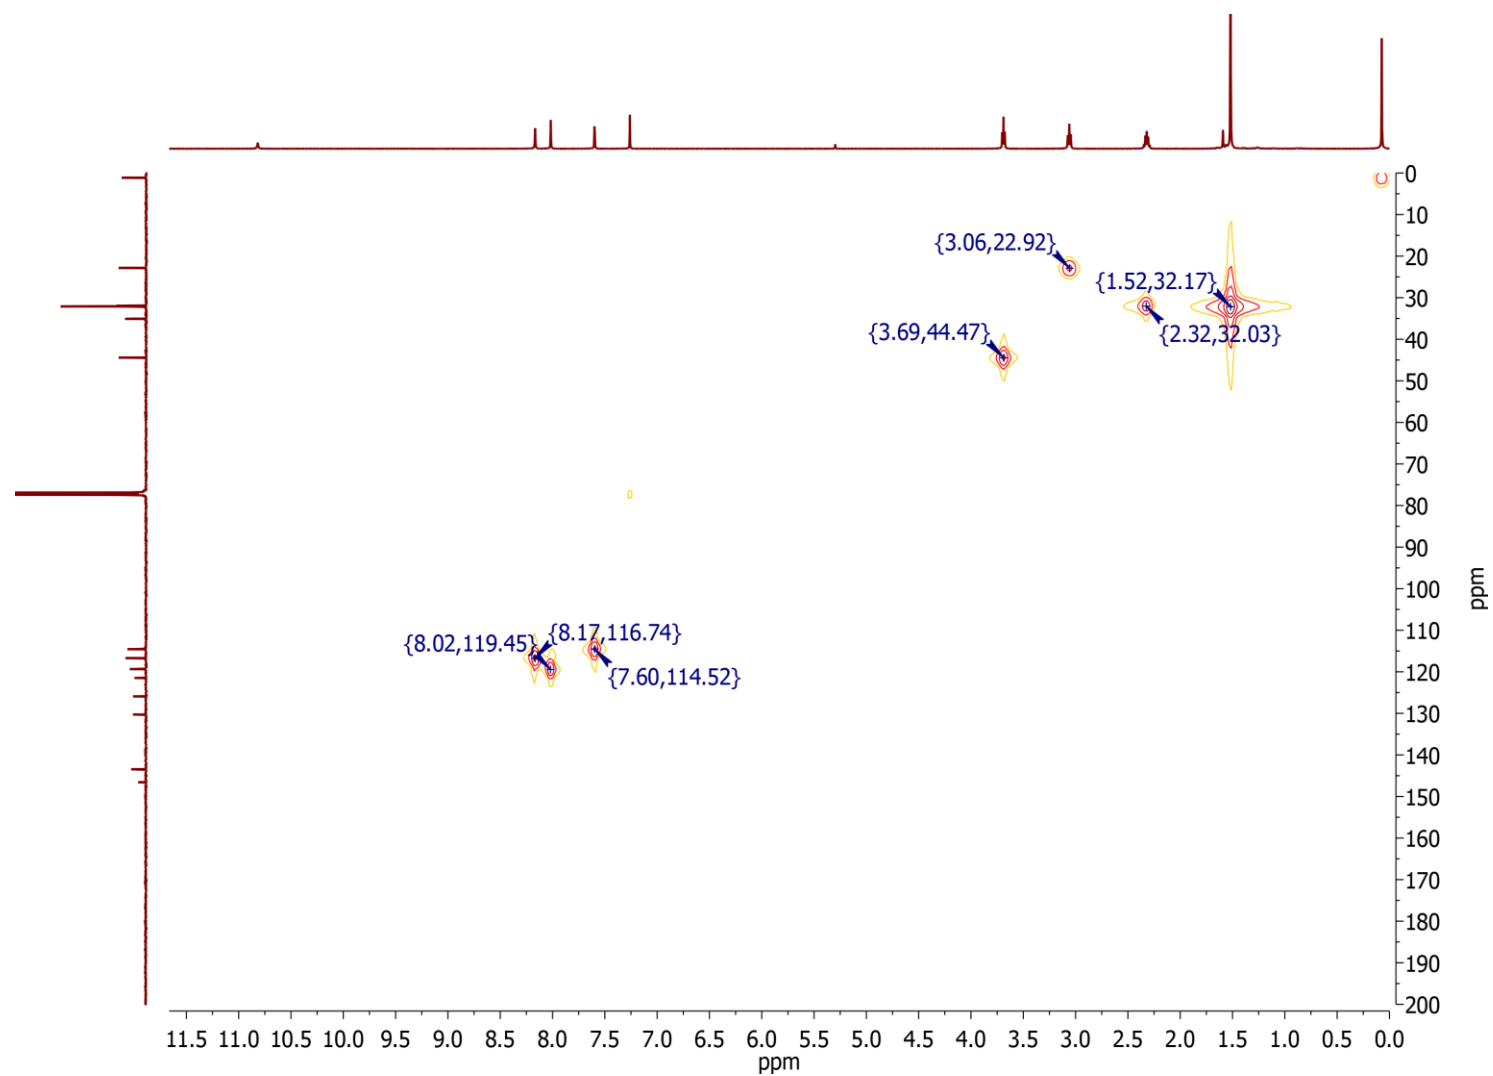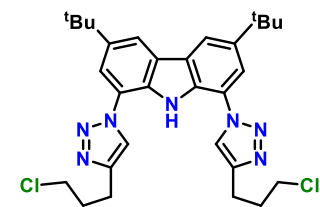

Figure S 4:  $^1\text{H} - ^{13}\text{C}$  HSQC of **2a** in  $\text{CDCl}_3$  at 298 K.

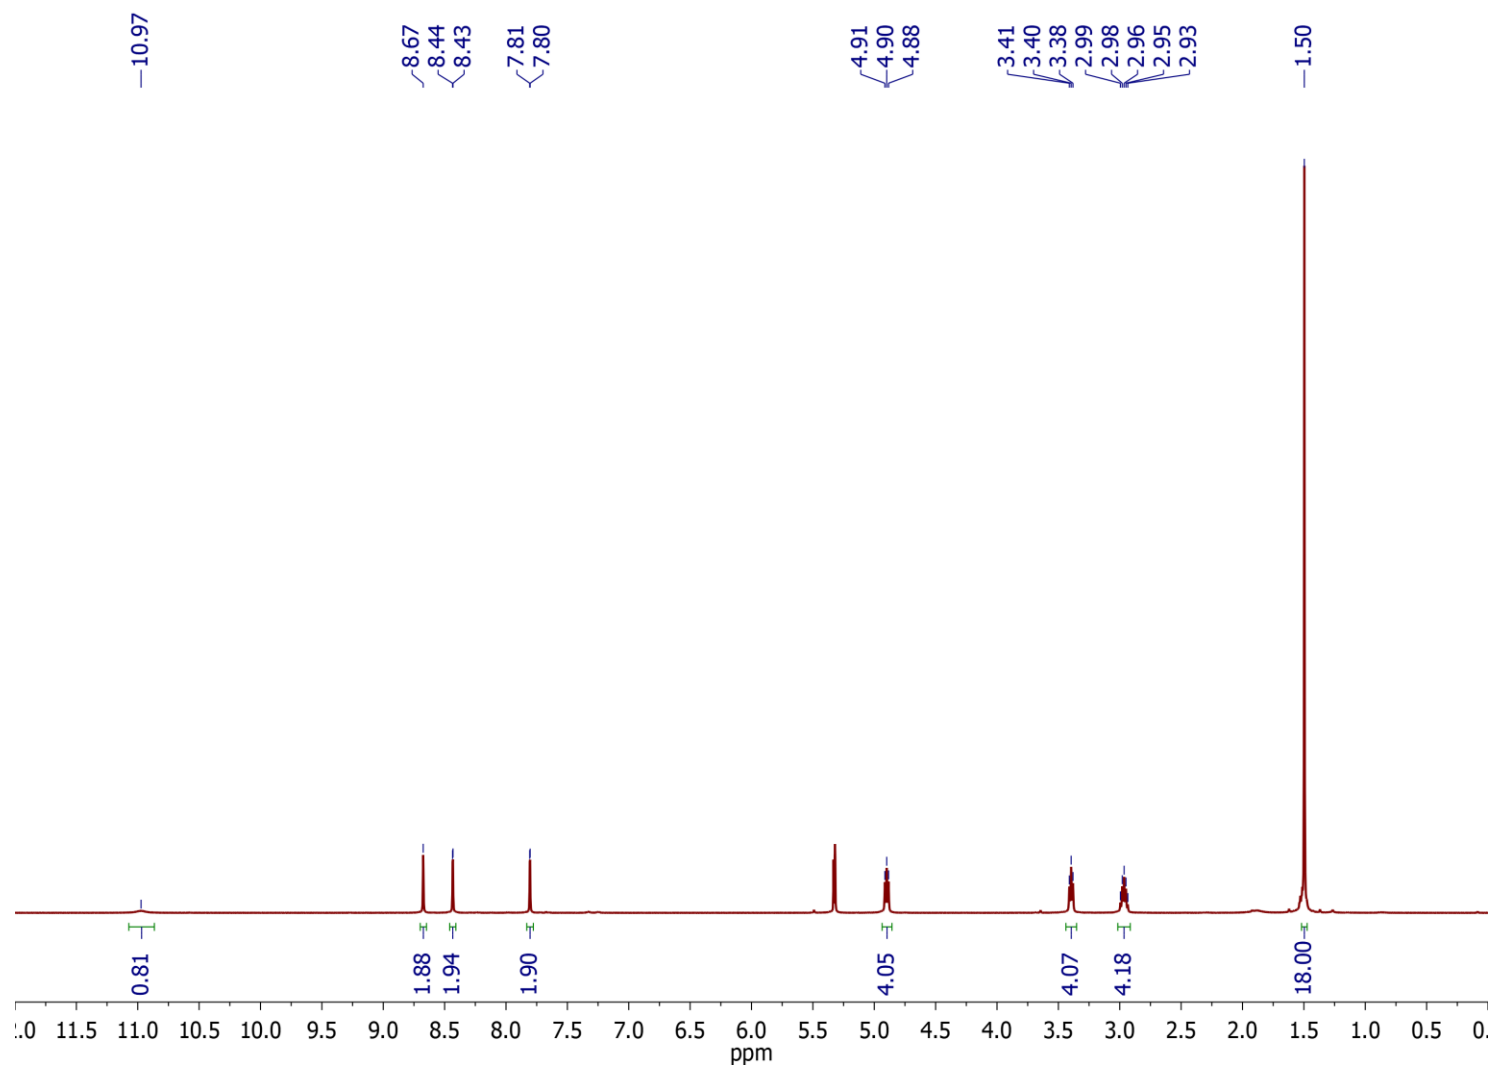

Figure S 5: <sup>1</sup>H NMR of **3a** in CD<sub>2</sub>Cl<sub>2</sub> at 298 K

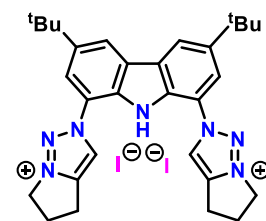

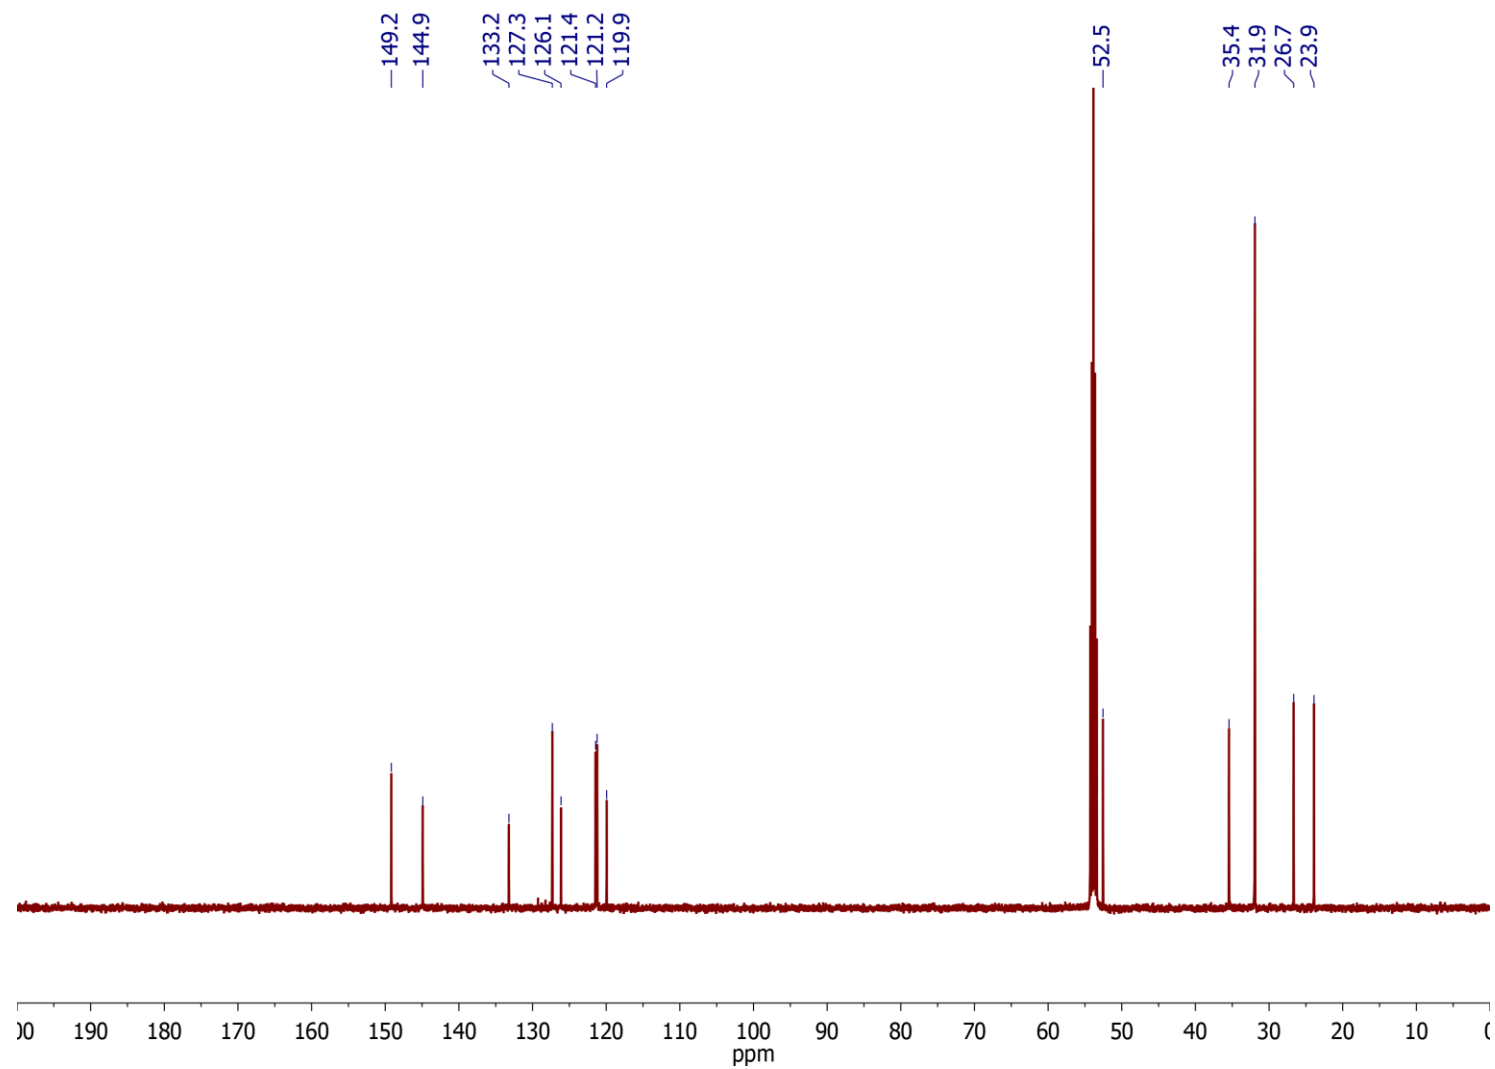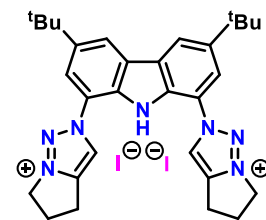

Figure S 6:  $^{13}\text{C}$  NMR of **3a** in  $\text{CD}_2\text{Cl}_2$  at 298 K.

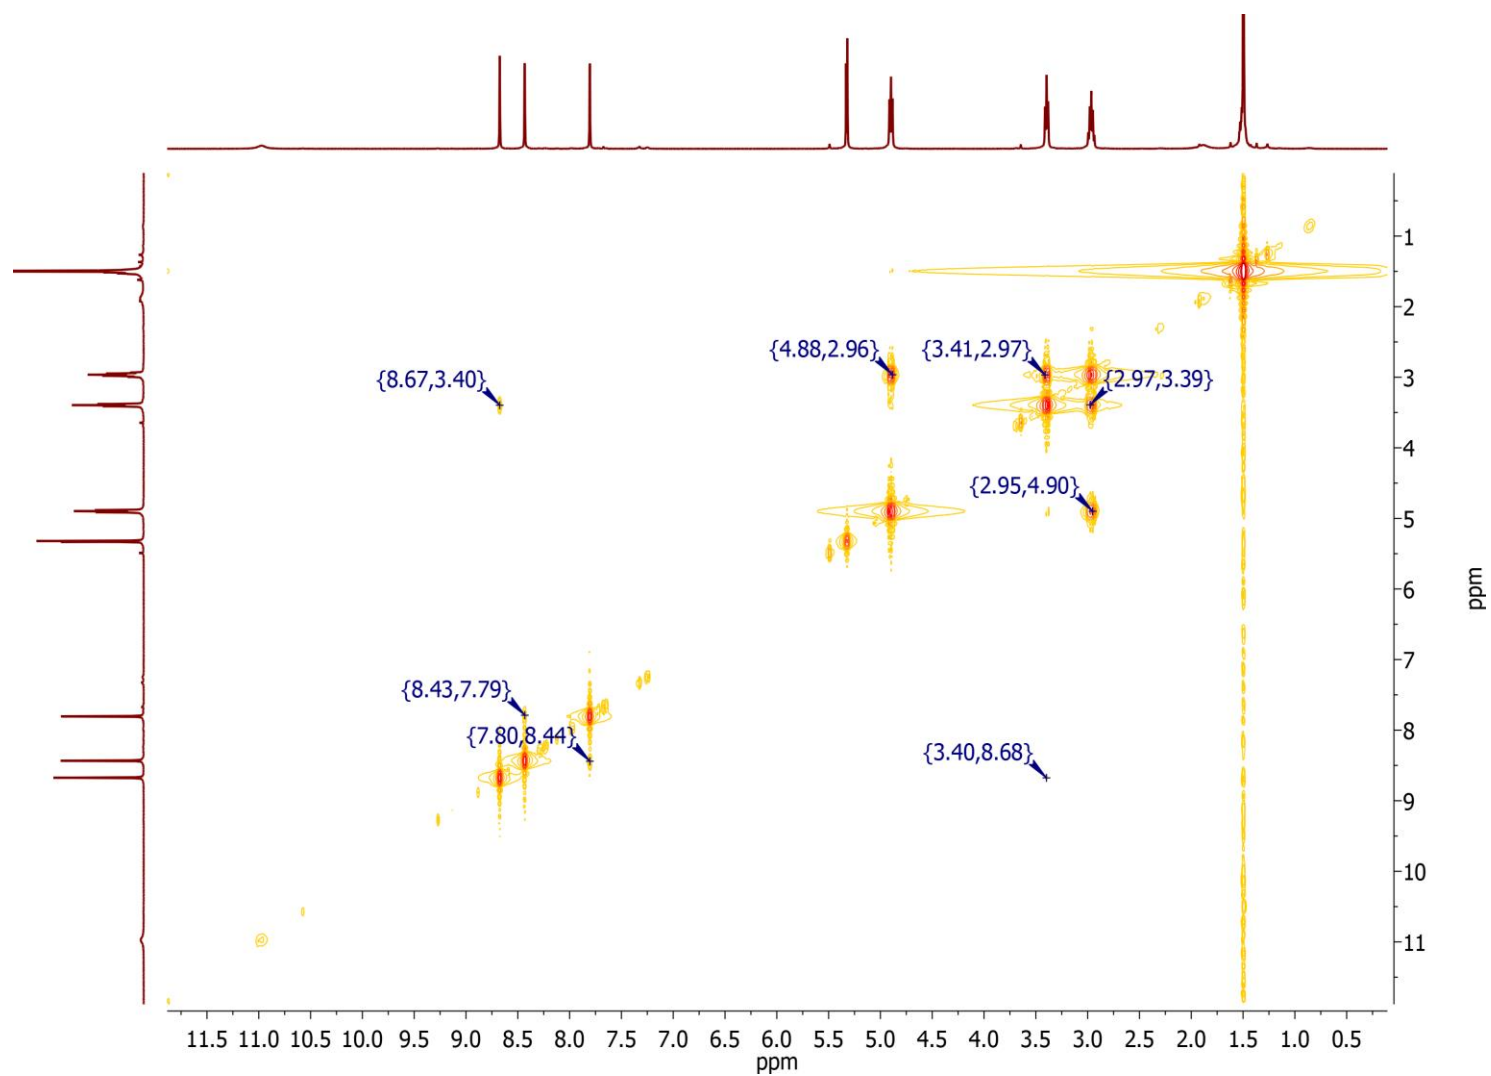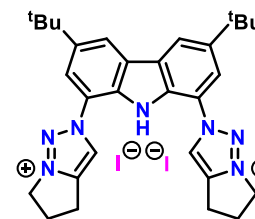



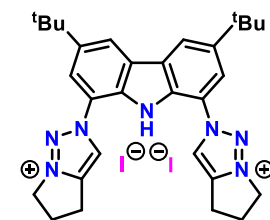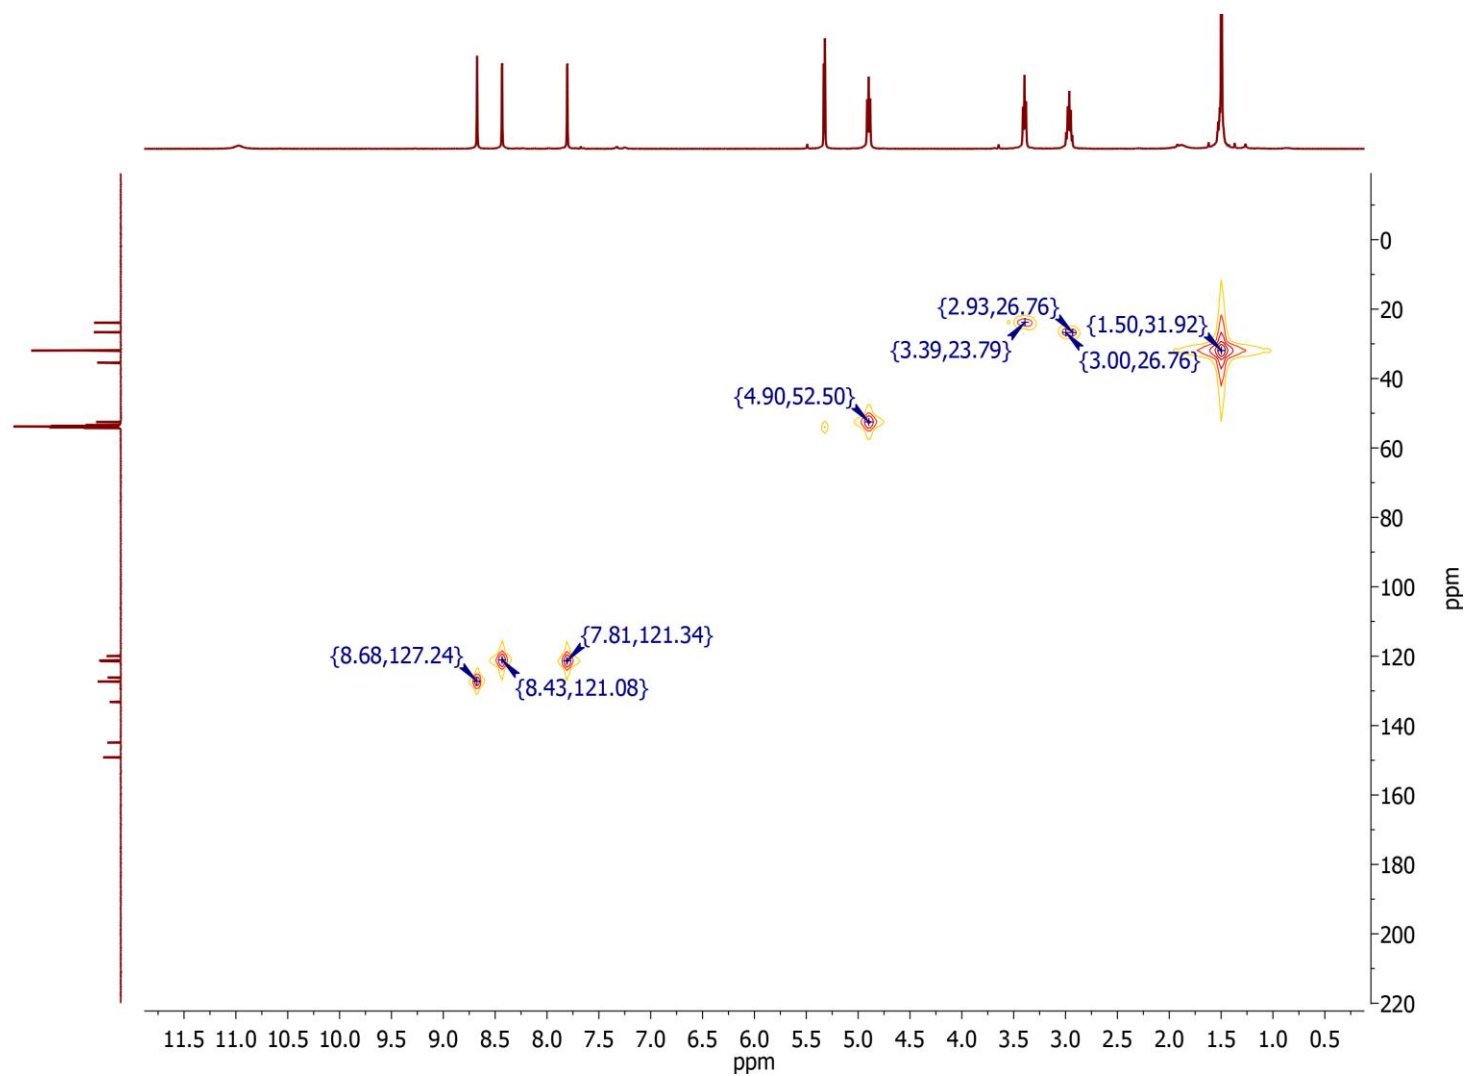

Figure S 8:  $^1\text{H} - ^{13}\text{C}$  HSQC of **3a** in  $\text{CD}_2\text{Cl}_2$  at 298 K.

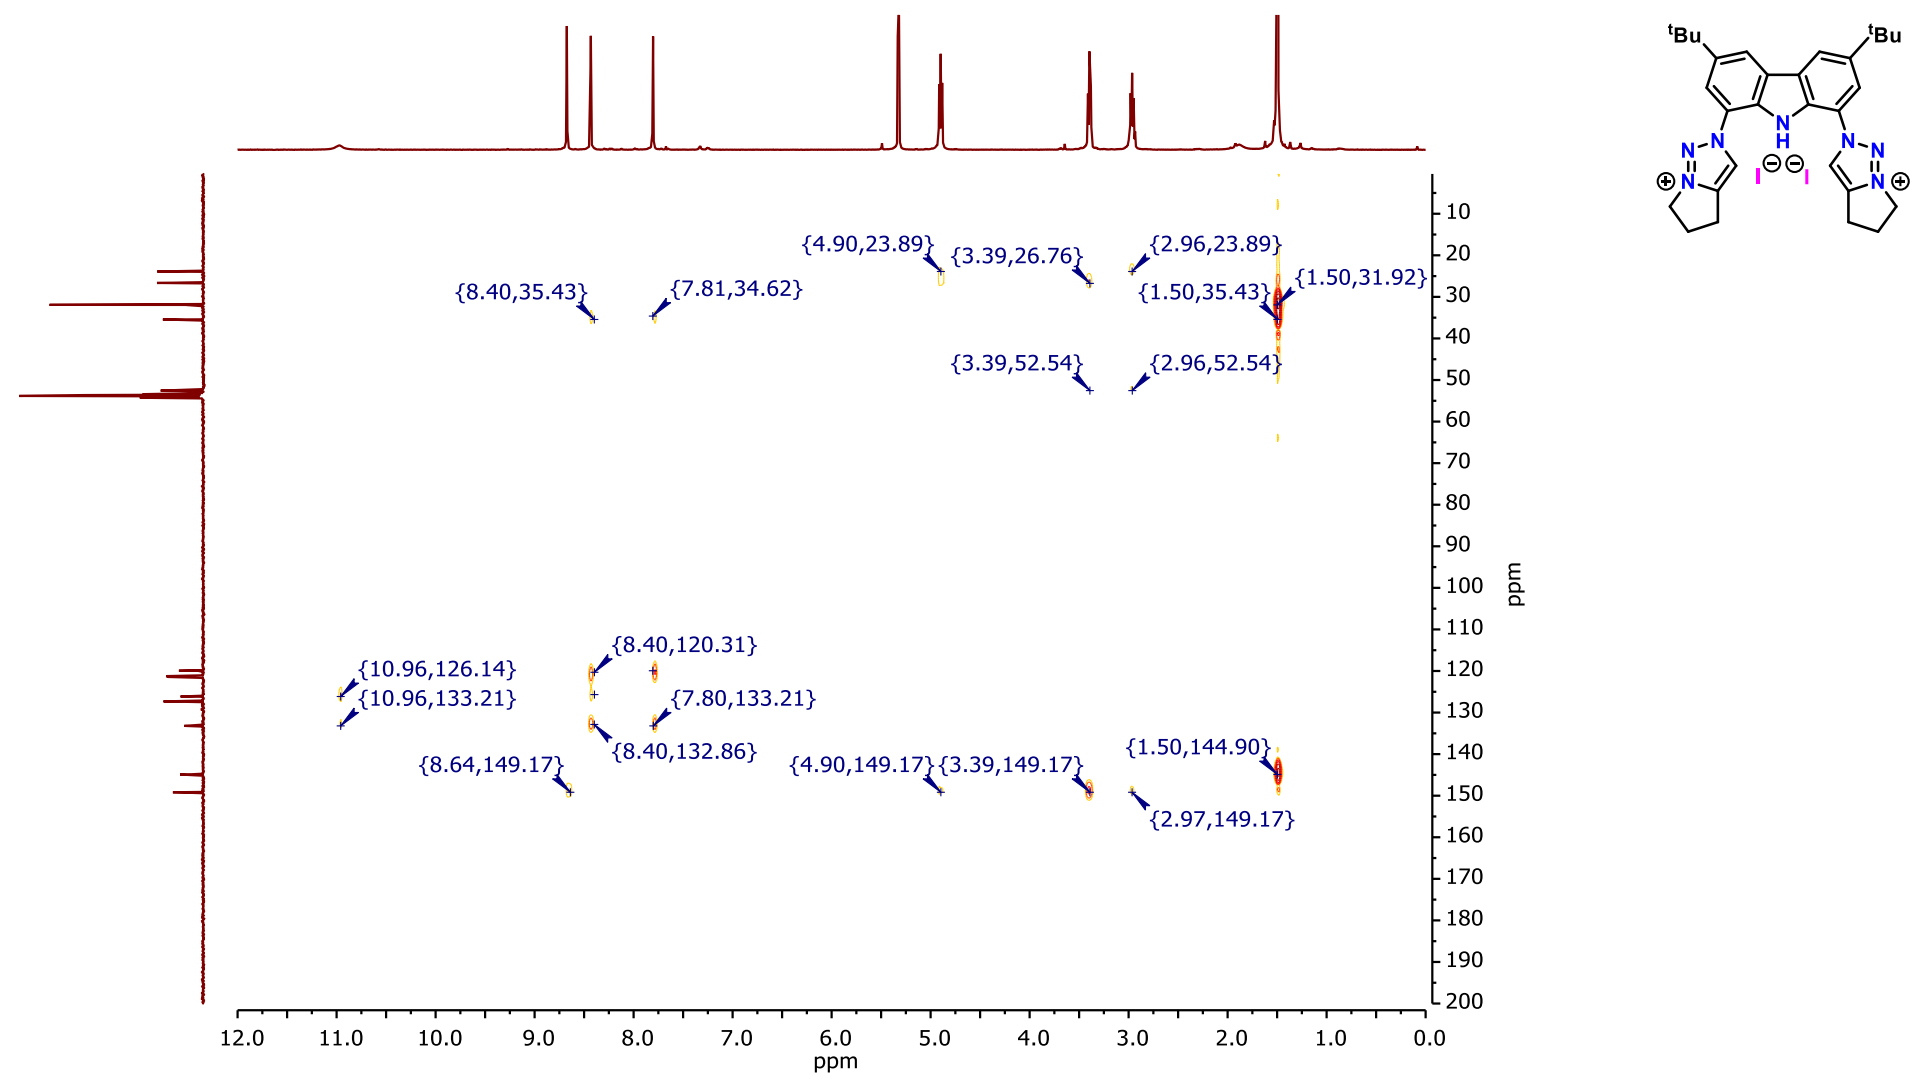

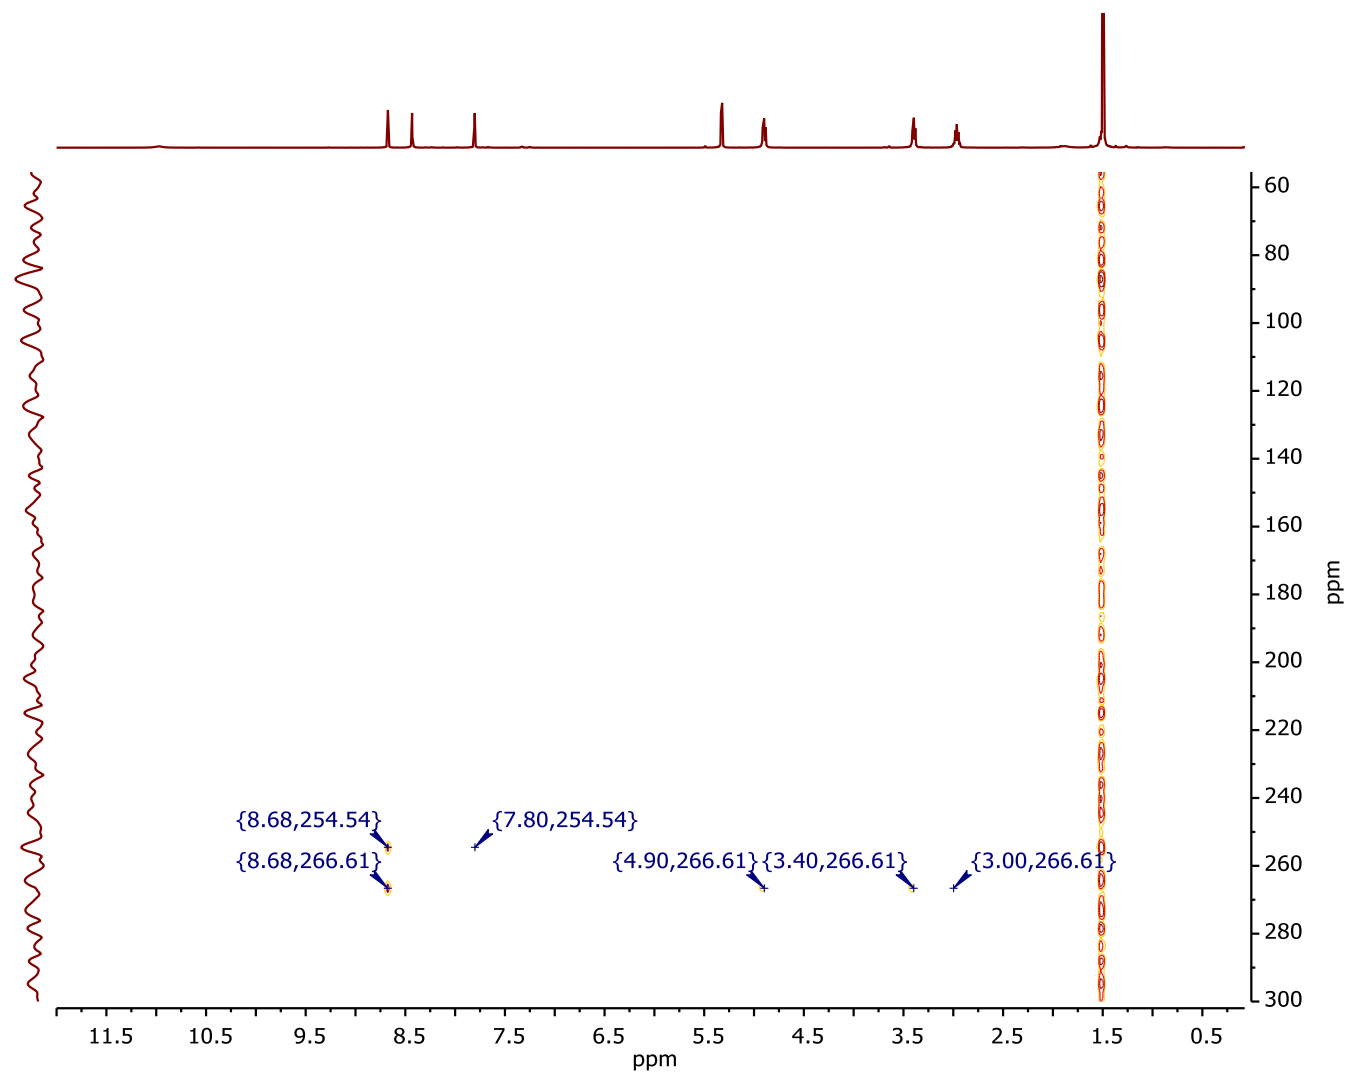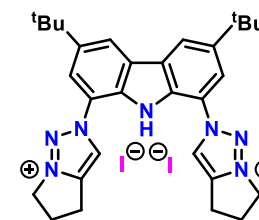

Figure S 10:  $^1\text{H}-^{15}\text{N}$  HMBC of **3a** in  $\text{CD}_2\text{Cl}_2$  at 298 K.

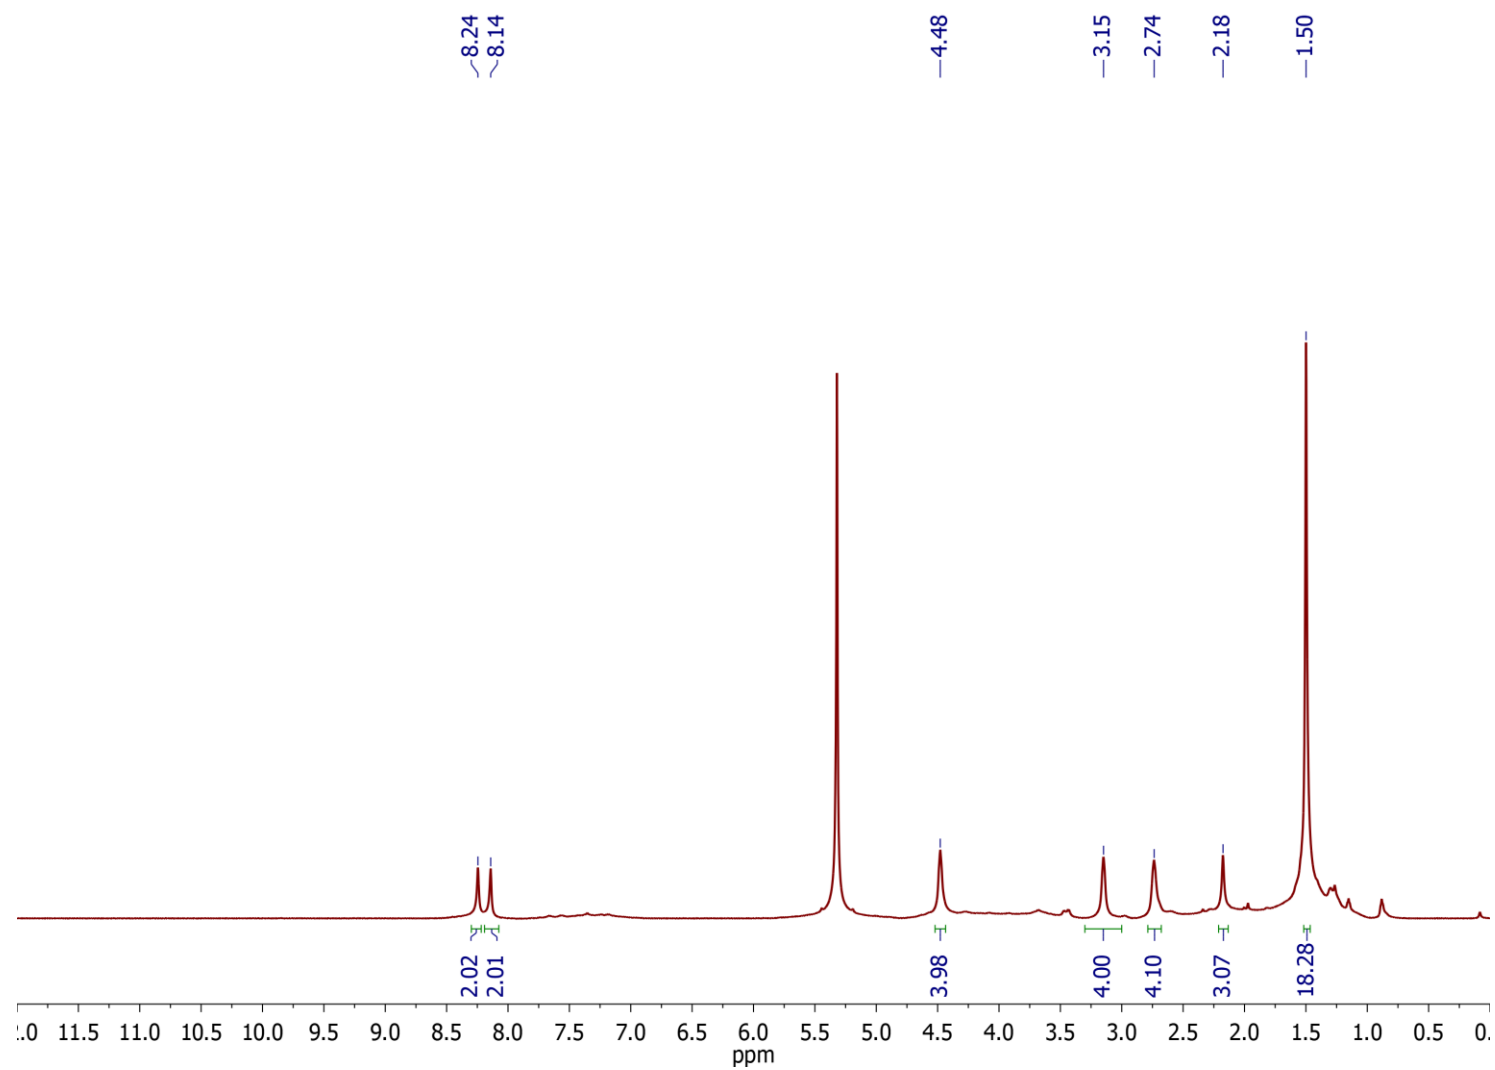

Figure S 11: <sup>1</sup>H NMR of **4a** in CD<sub>2</sub>Cl<sub>2</sub> at 298 K

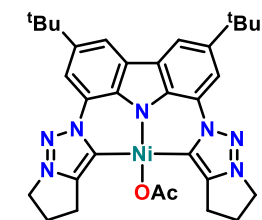

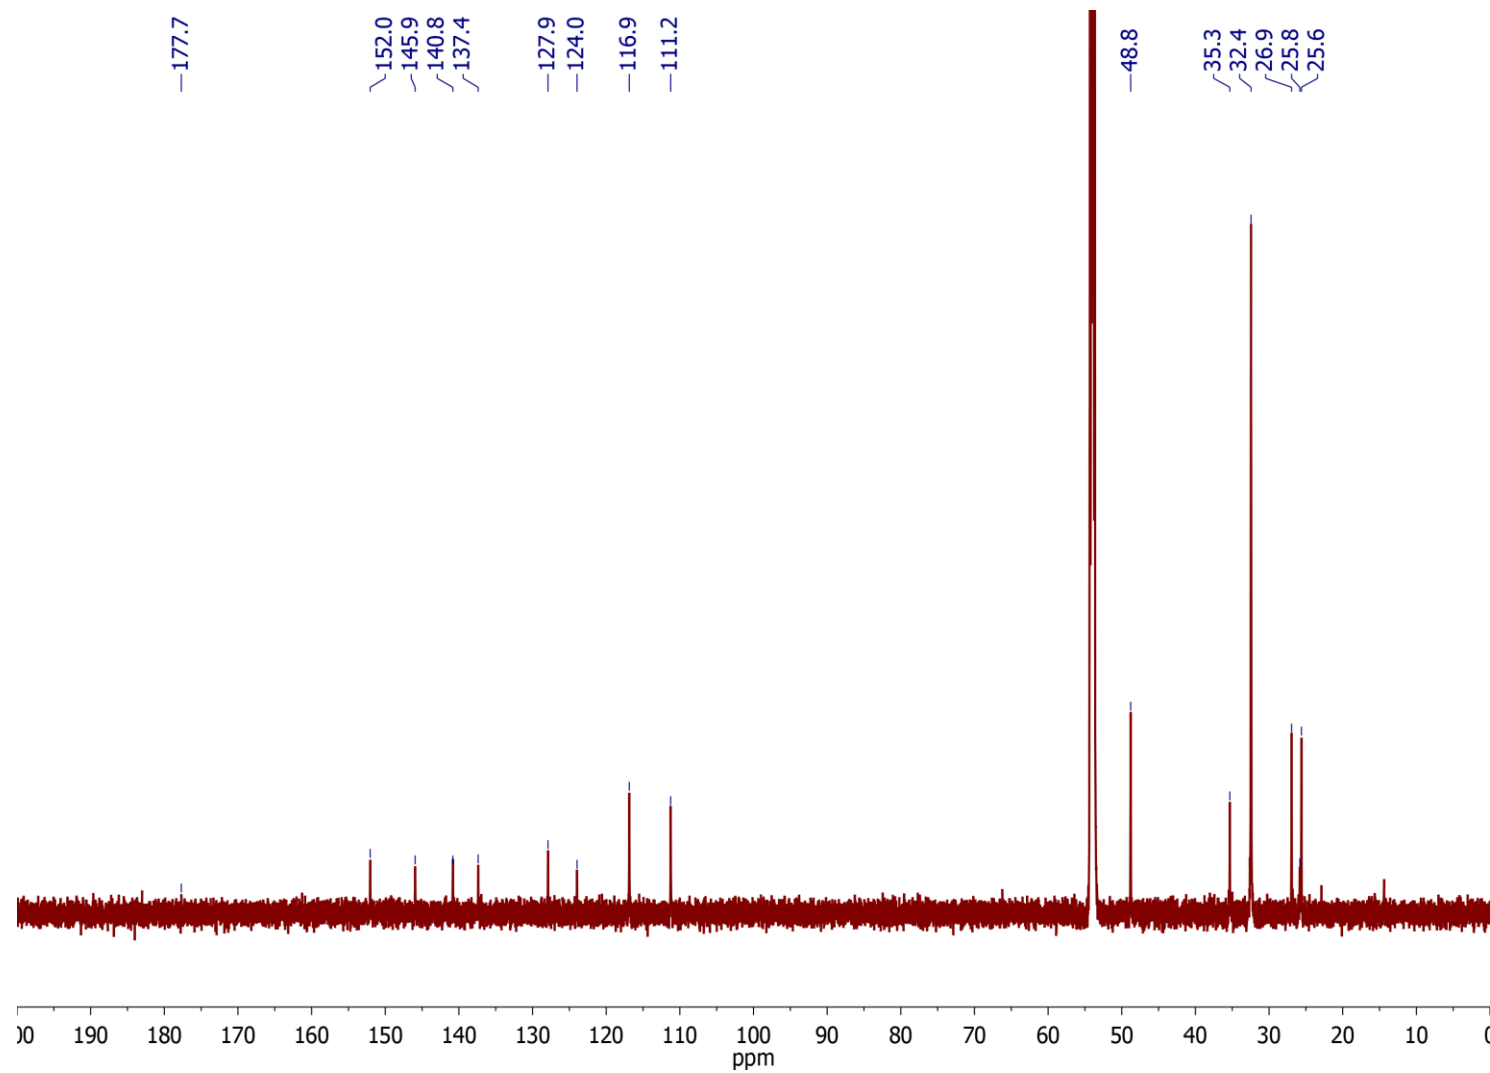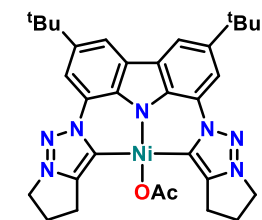

Figure S 12:  $^{13}\text{C}$  NMR of **4a** in  $\text{CD}_2\text{Cl}_2$  at 298 K.

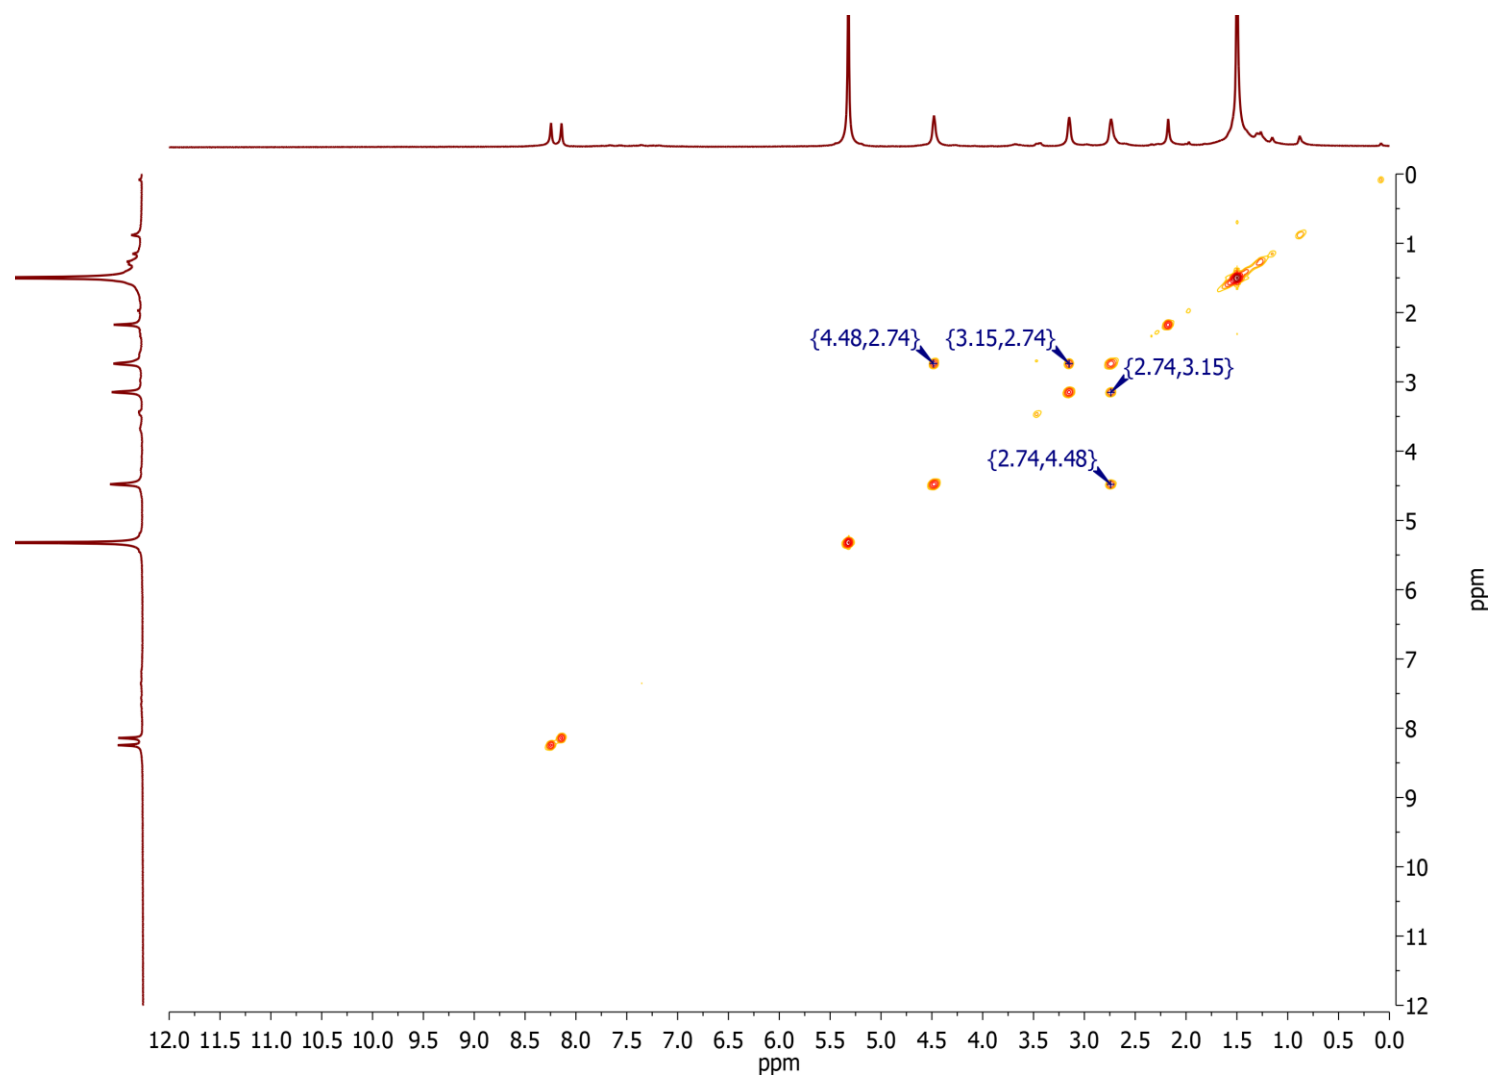

Figure S 13:  $^1\text{H} - ^1\text{H}$  COSY of **4a** in  $\text{CD}_2\text{Cl}_2$  at 298 K.

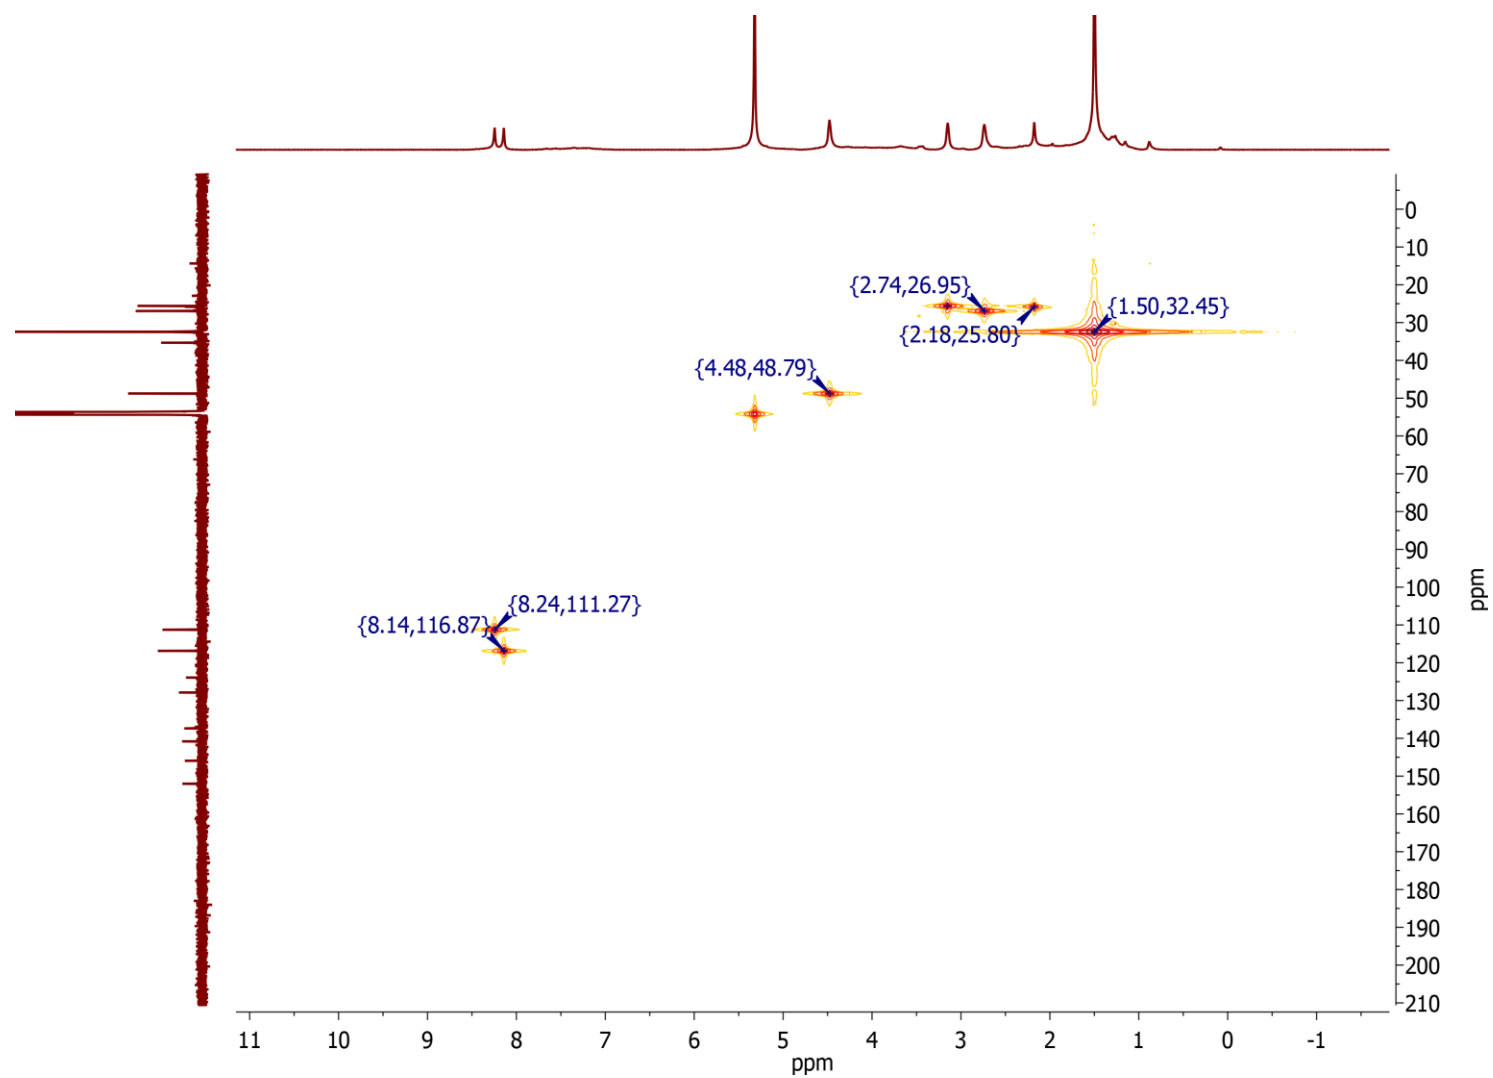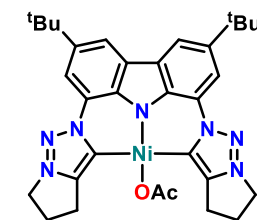

Figure S 14:  $^1\text{H} - ^{13}\text{C}$  HSQC of **4a** in  $\text{CD}_2\text{Cl}_2$  at 298 K.

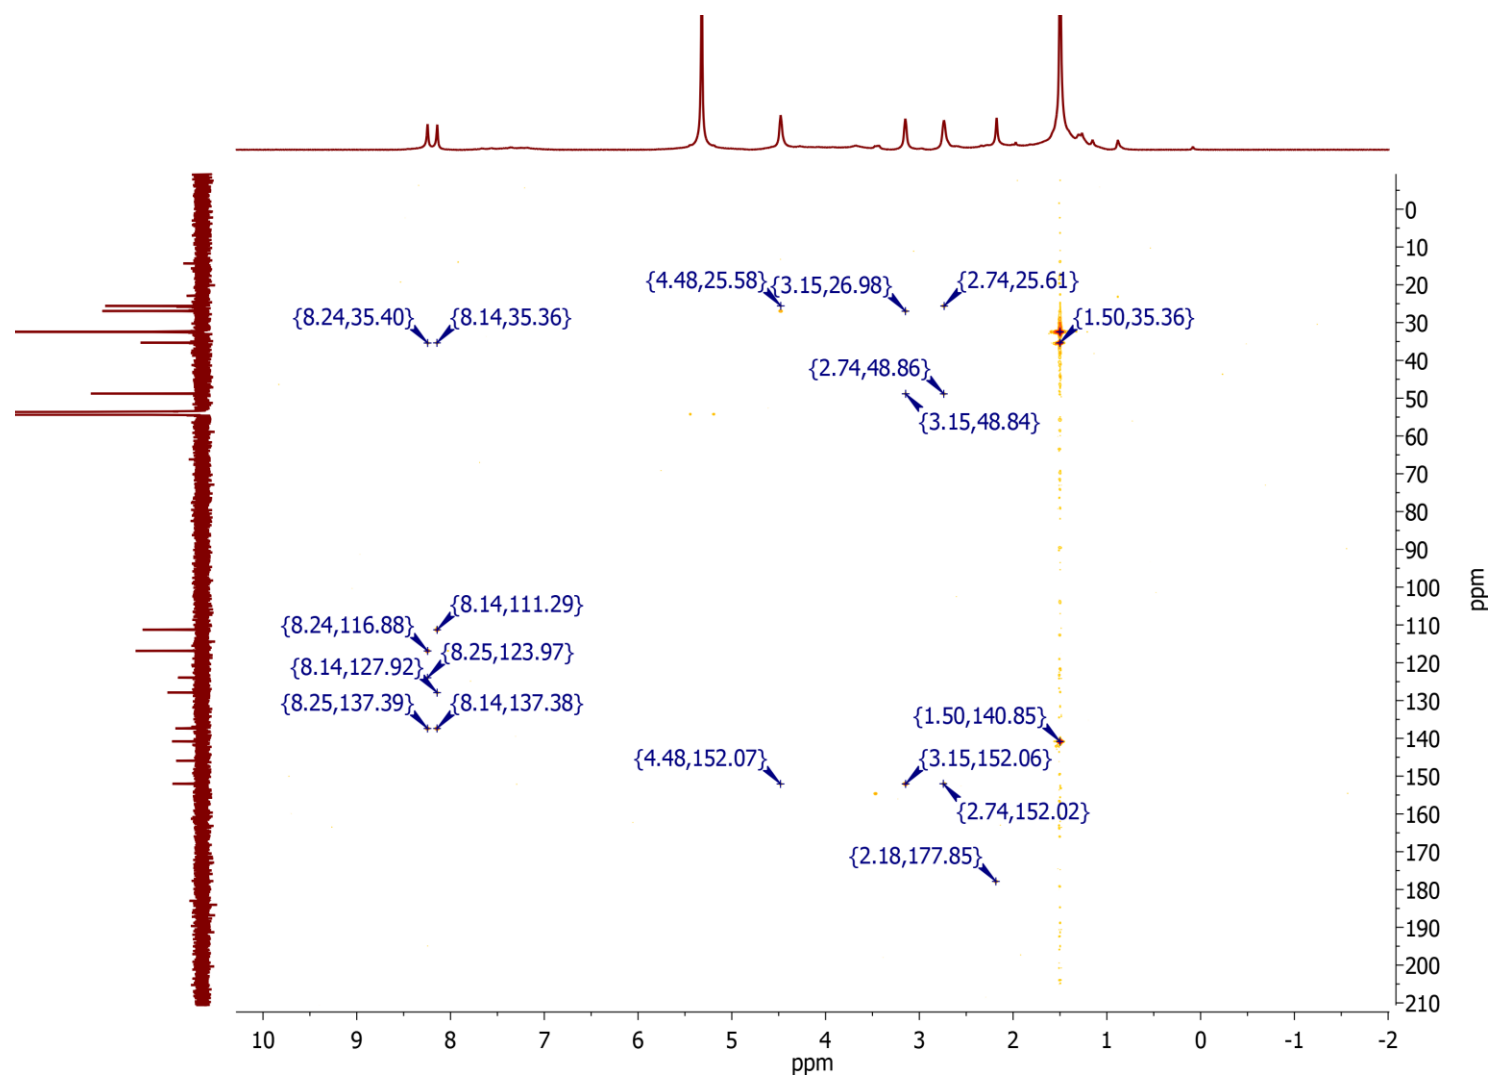

Figure S 15:  $^1\text{H} - ^{13}\text{C}$  HMBC of **4a** in  $\text{CD}_2\text{Cl}_2$  at 298 K



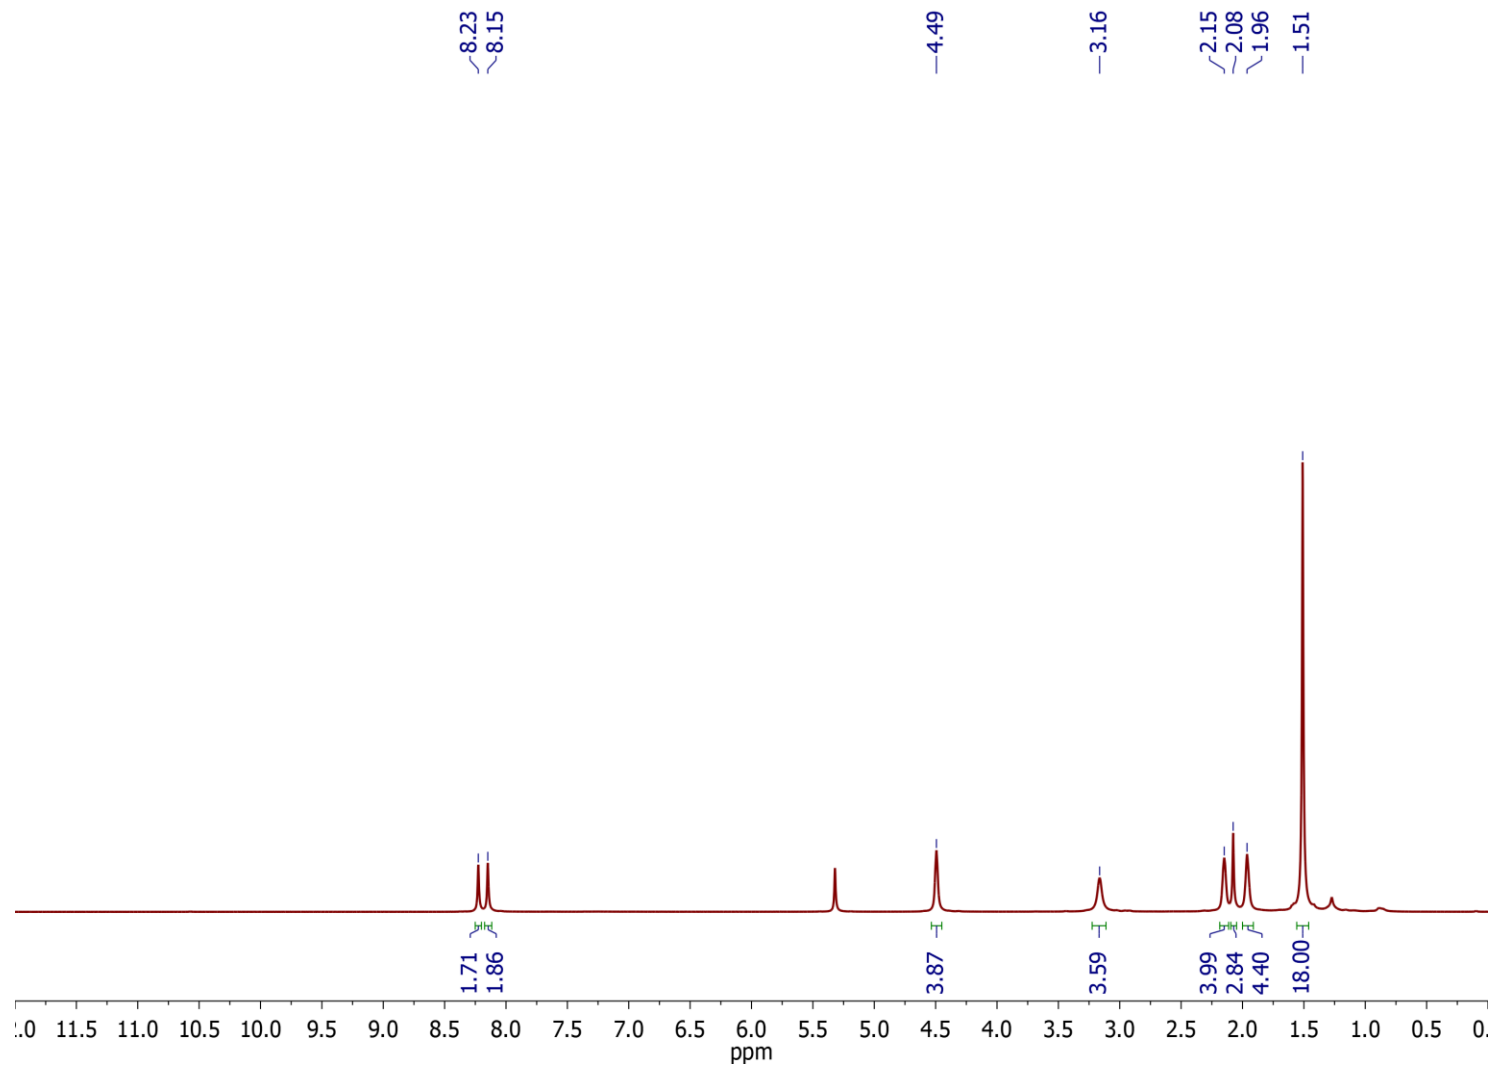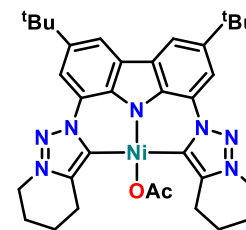

Figure S 16: <sup>1</sup>H NMR of **4b** in CD<sub>2</sub>Cl<sub>2</sub> at 298 K.

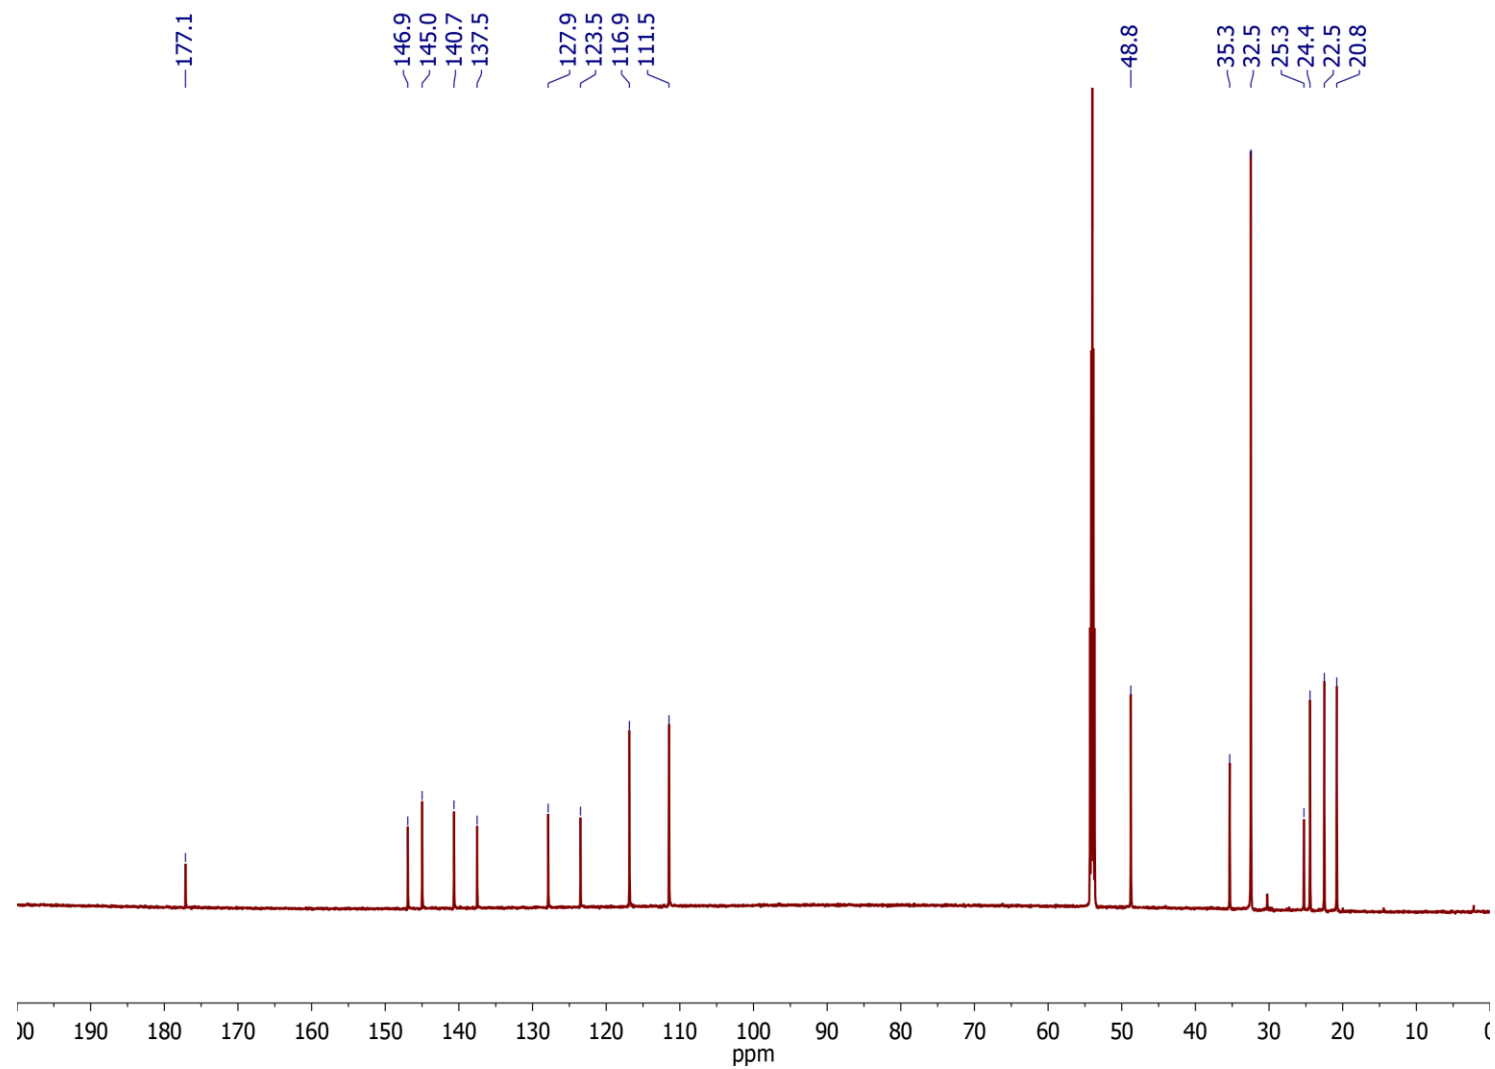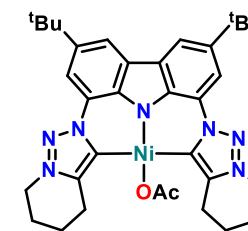

Figure S 17:  $^{13}\text{C}$  NMR of **4b** in  $\text{CD}_2\text{Cl}_2$  at 298 K.

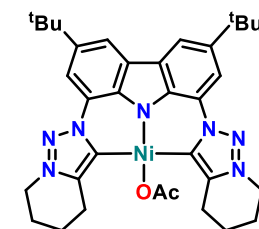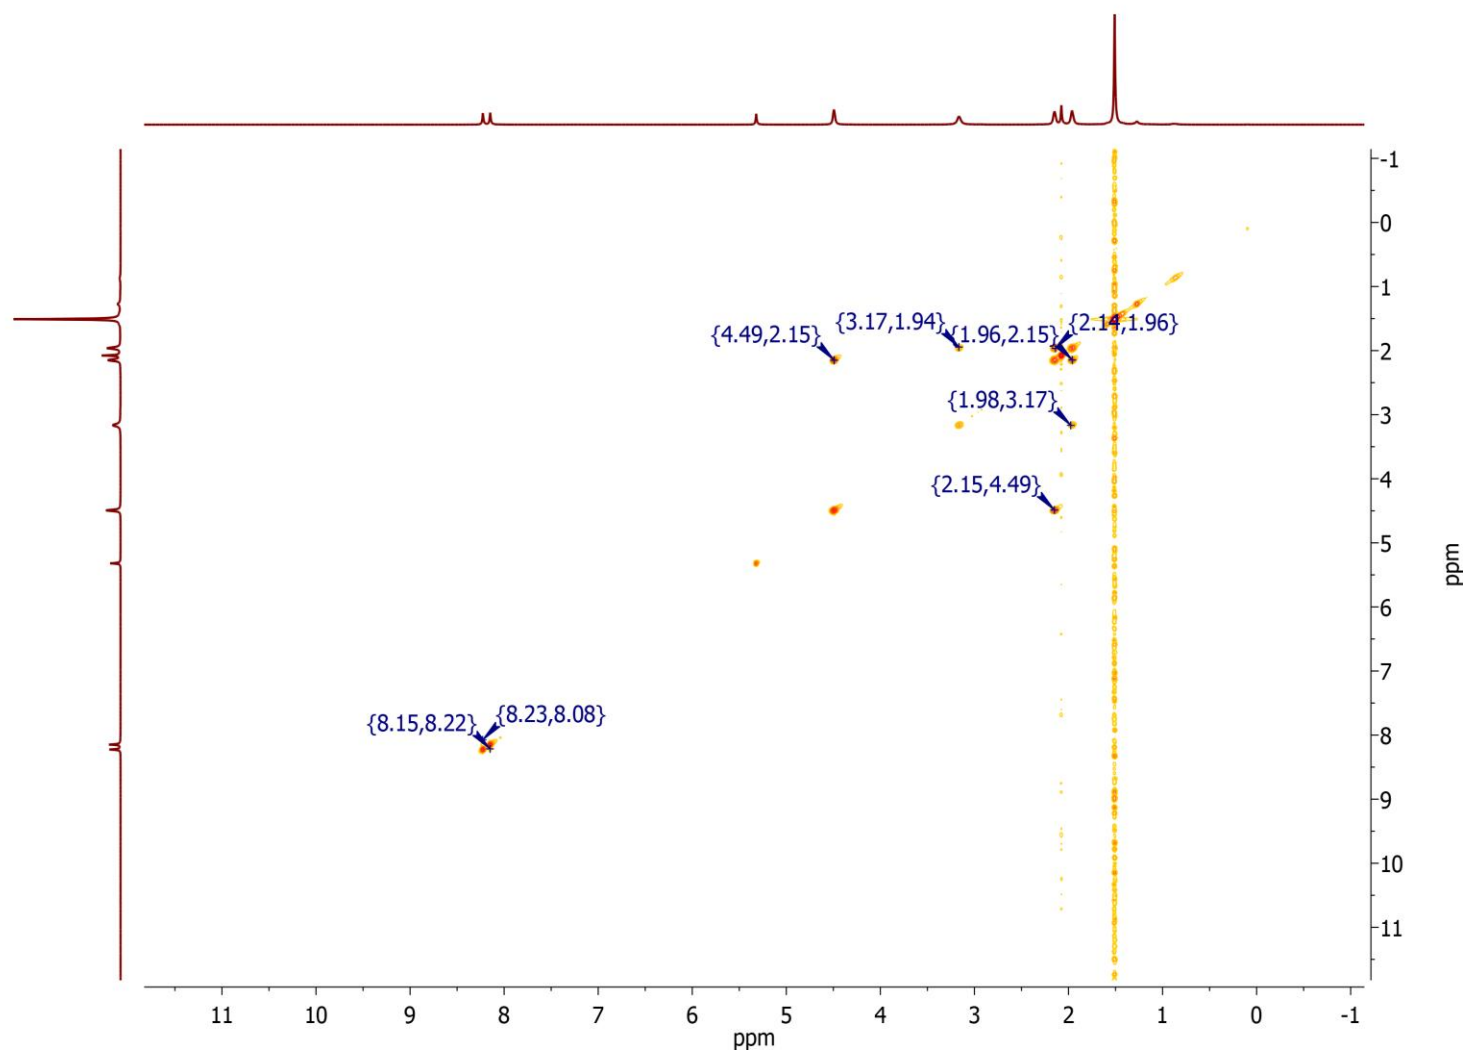

Figure S 18:  $^1\text{H} - ^1\text{H}$  COSY of **4b** in  $\text{CD}_2\text{Cl}_2$  at 298 K.

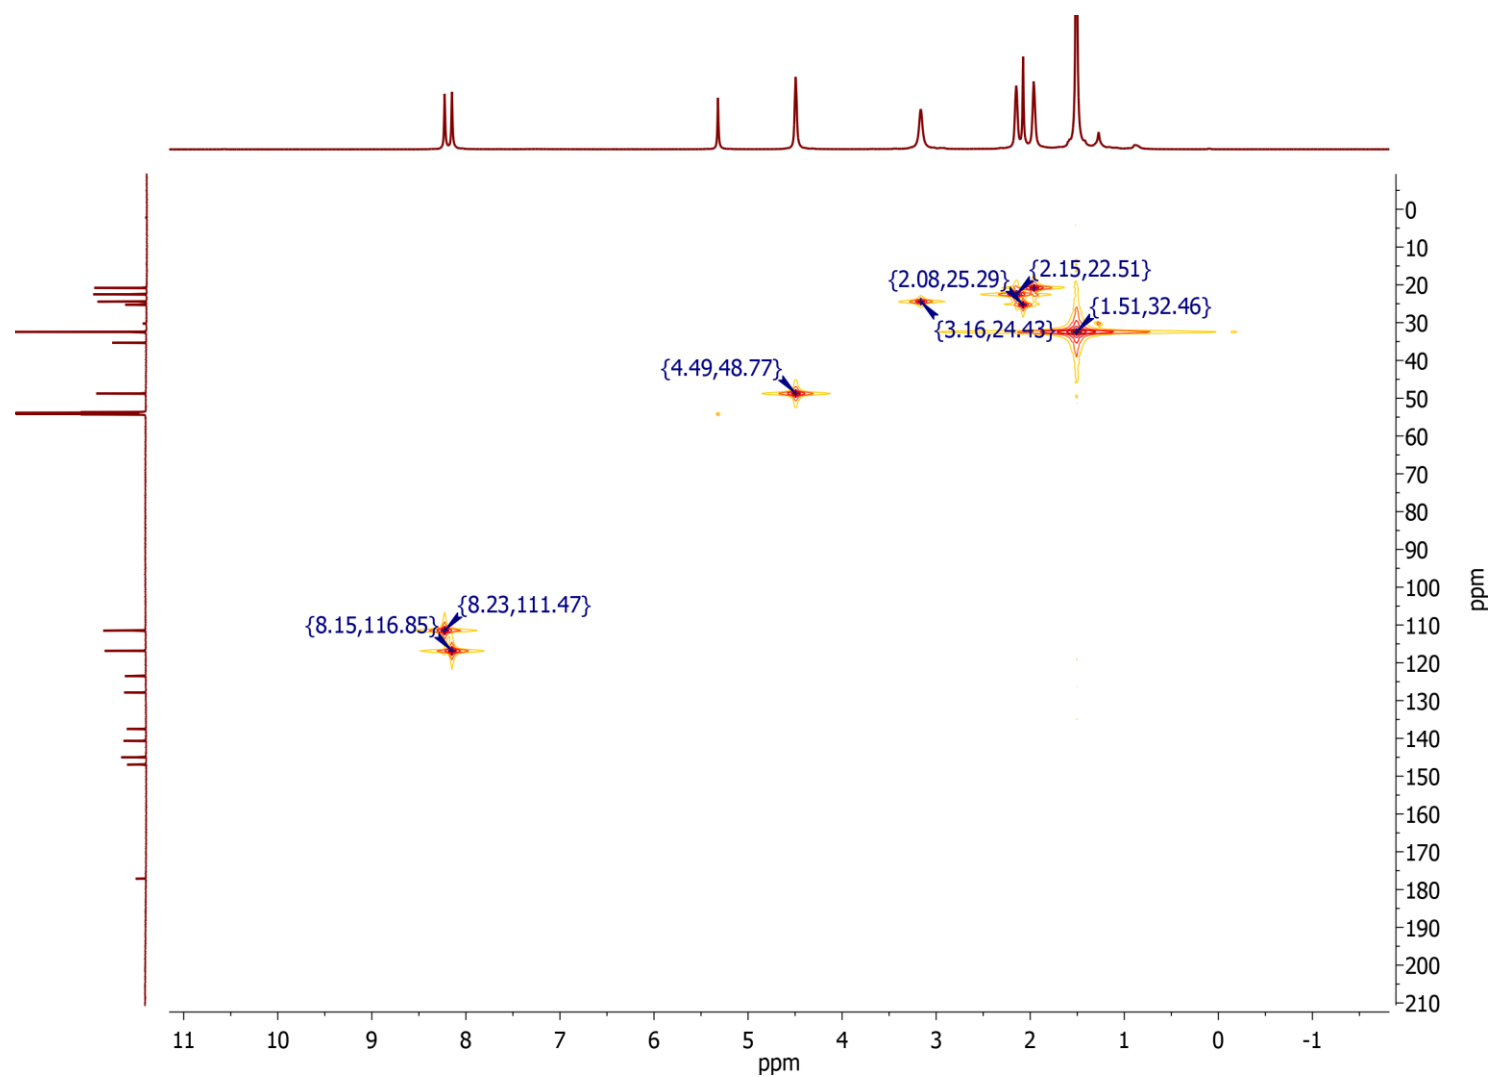

Figure S 19:  $^1\text{H} - ^{13}\text{C}$  HSQC of **4b** in  $\text{CD}_2\text{Cl}_2$  at 298 K.

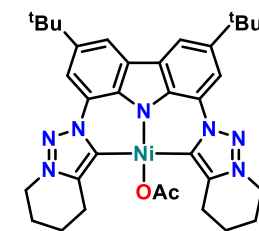

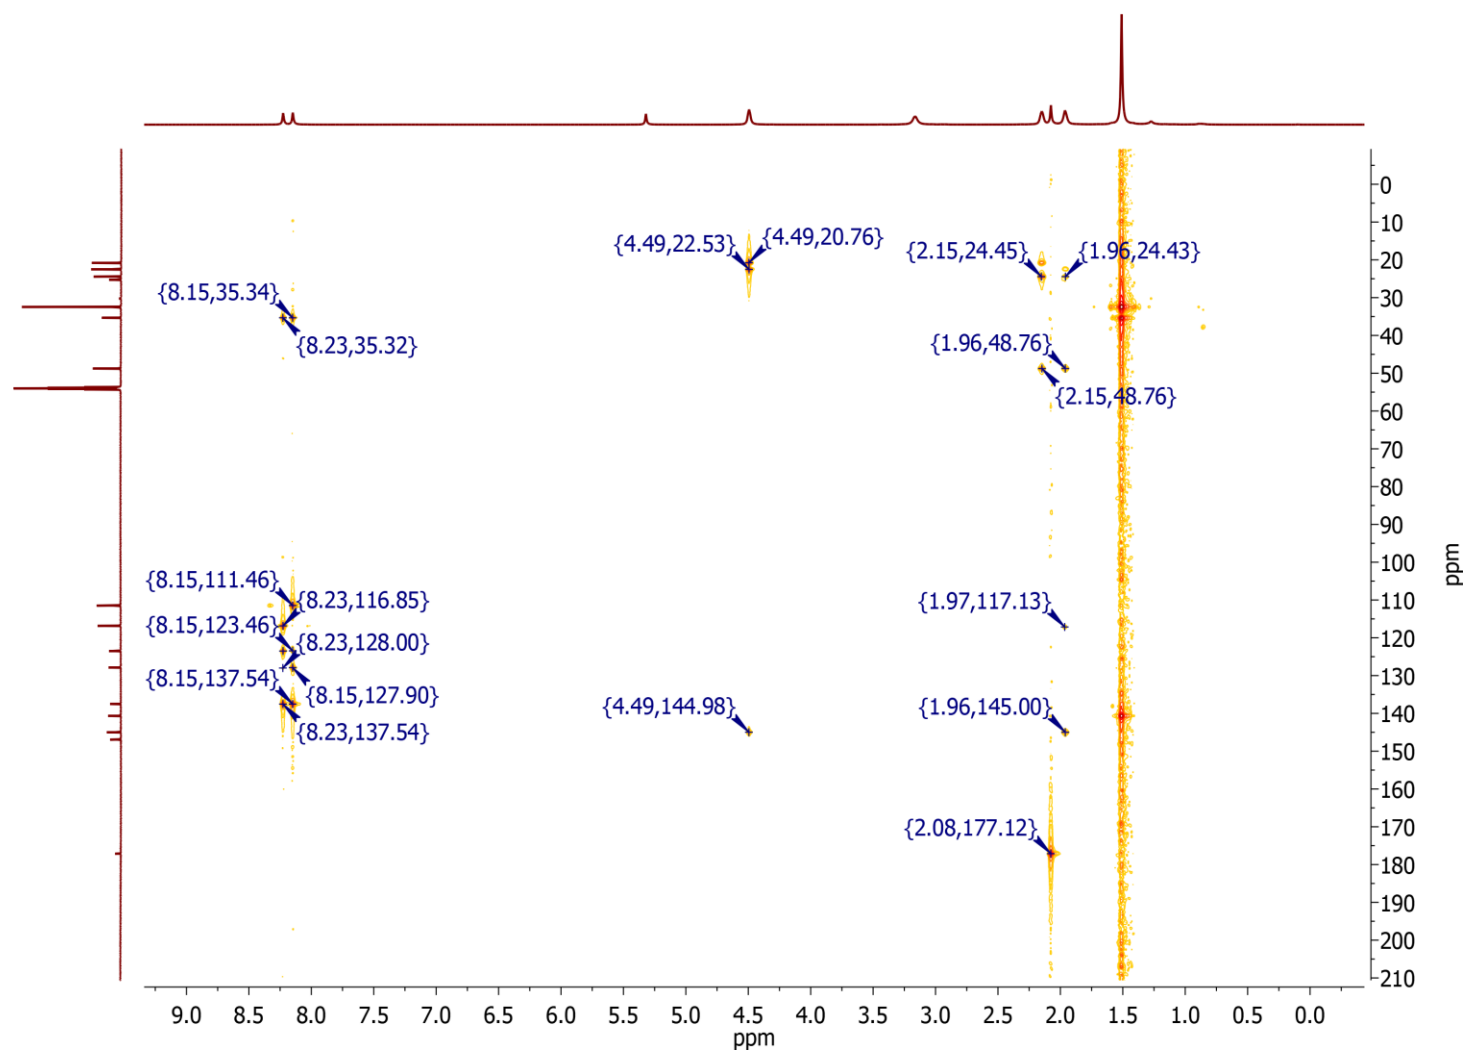

Figure S 20:  $^1\text{H} - ^{13}\text{C}$  HMBC of **4b** in  $\text{CD}_2\text{Cl}_2$  at 298 K

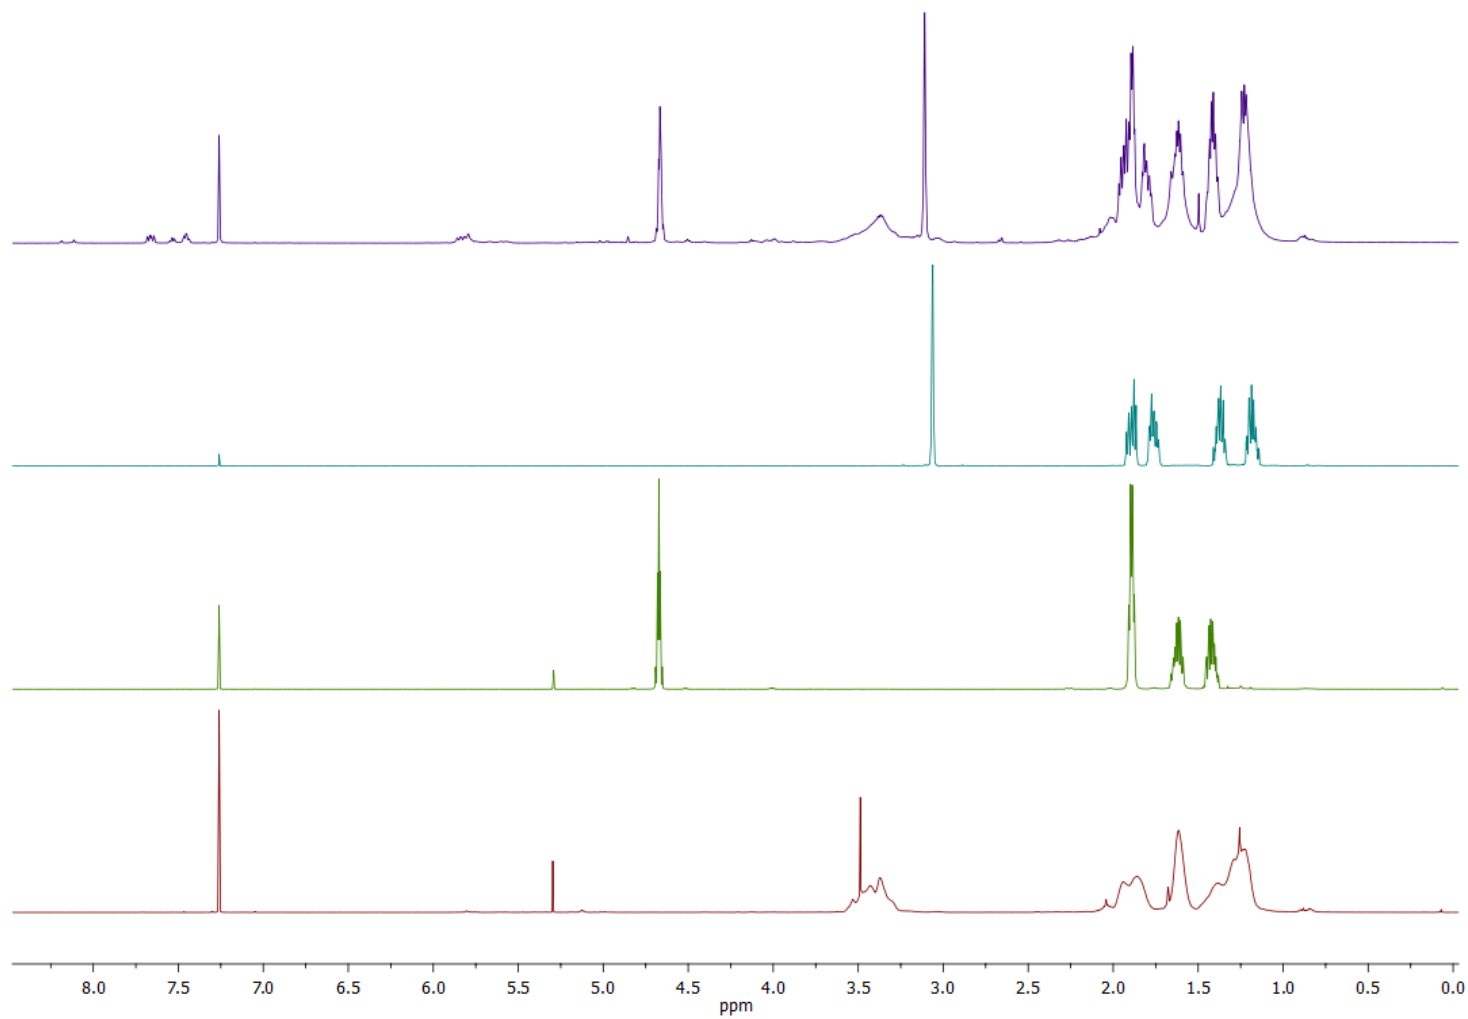

Figure S 21: Stacked  $^1\text{H}$ -NMR spectra of crude sample from table 1 entry 8 (violet, top), CHO (blue, 2<sup>nd</sup> from top), cyclic carbonate from CHO (green, 3<sup>rd</sup> from top) and isolated polyether from CHO (red, bottom) in  $\text{CDCl}_3$  at 298 K.

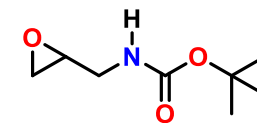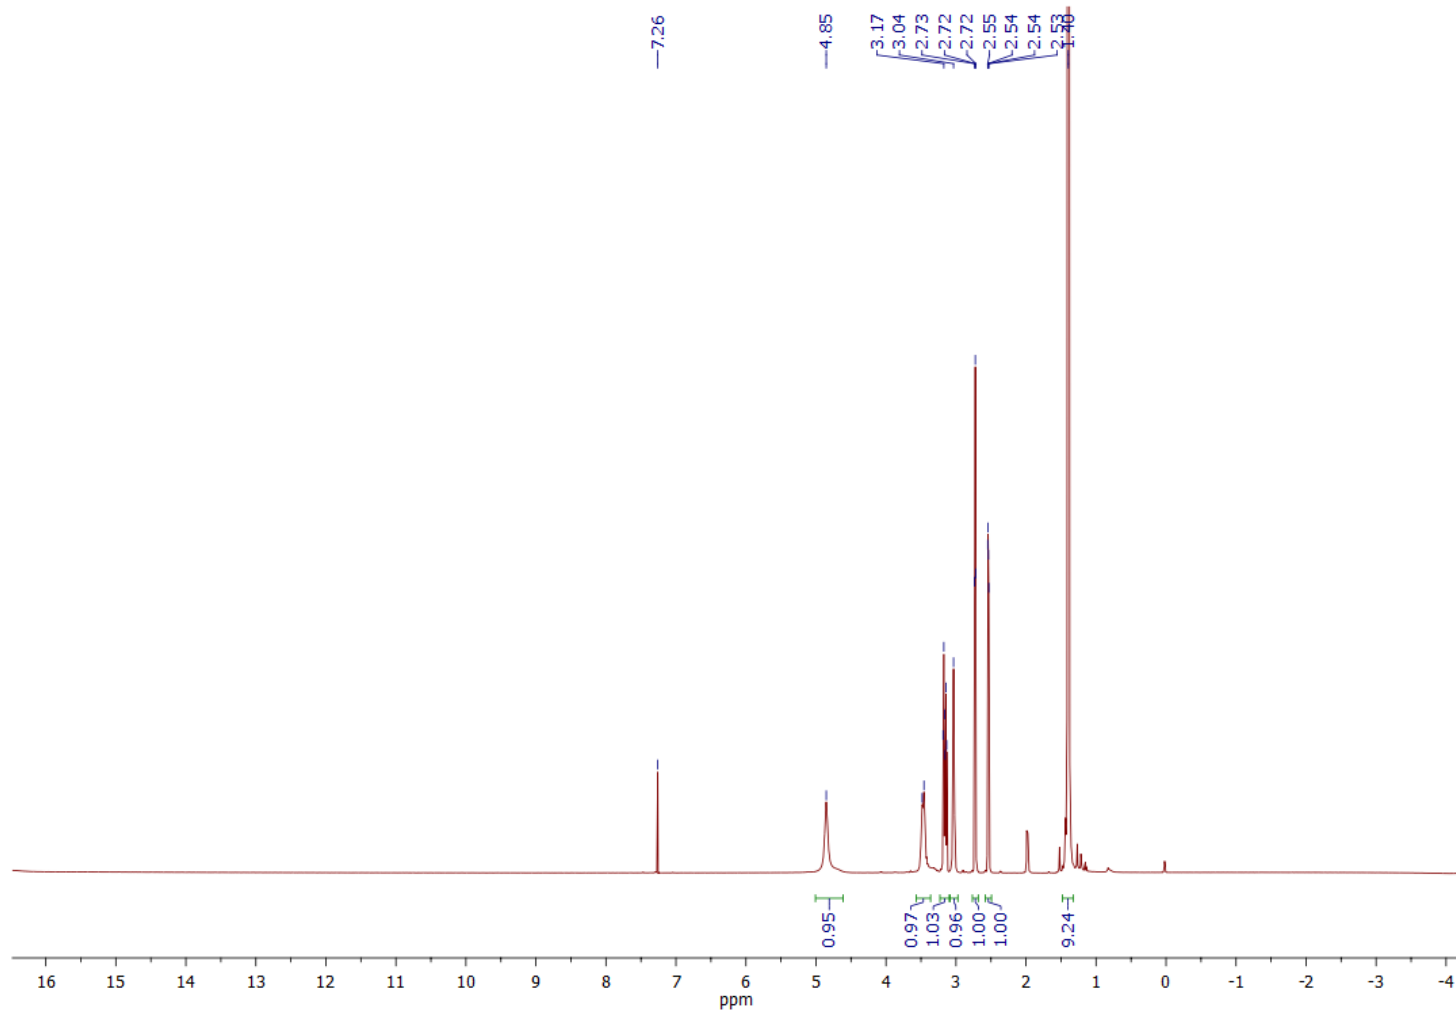

Figure S 22:  $^1\text{H}$ -NMR of **tBOMC** in  $\text{CDCl}_3$  at 303 K. Impurities of ethyl acetate and a small amount unknown byproduct are present.

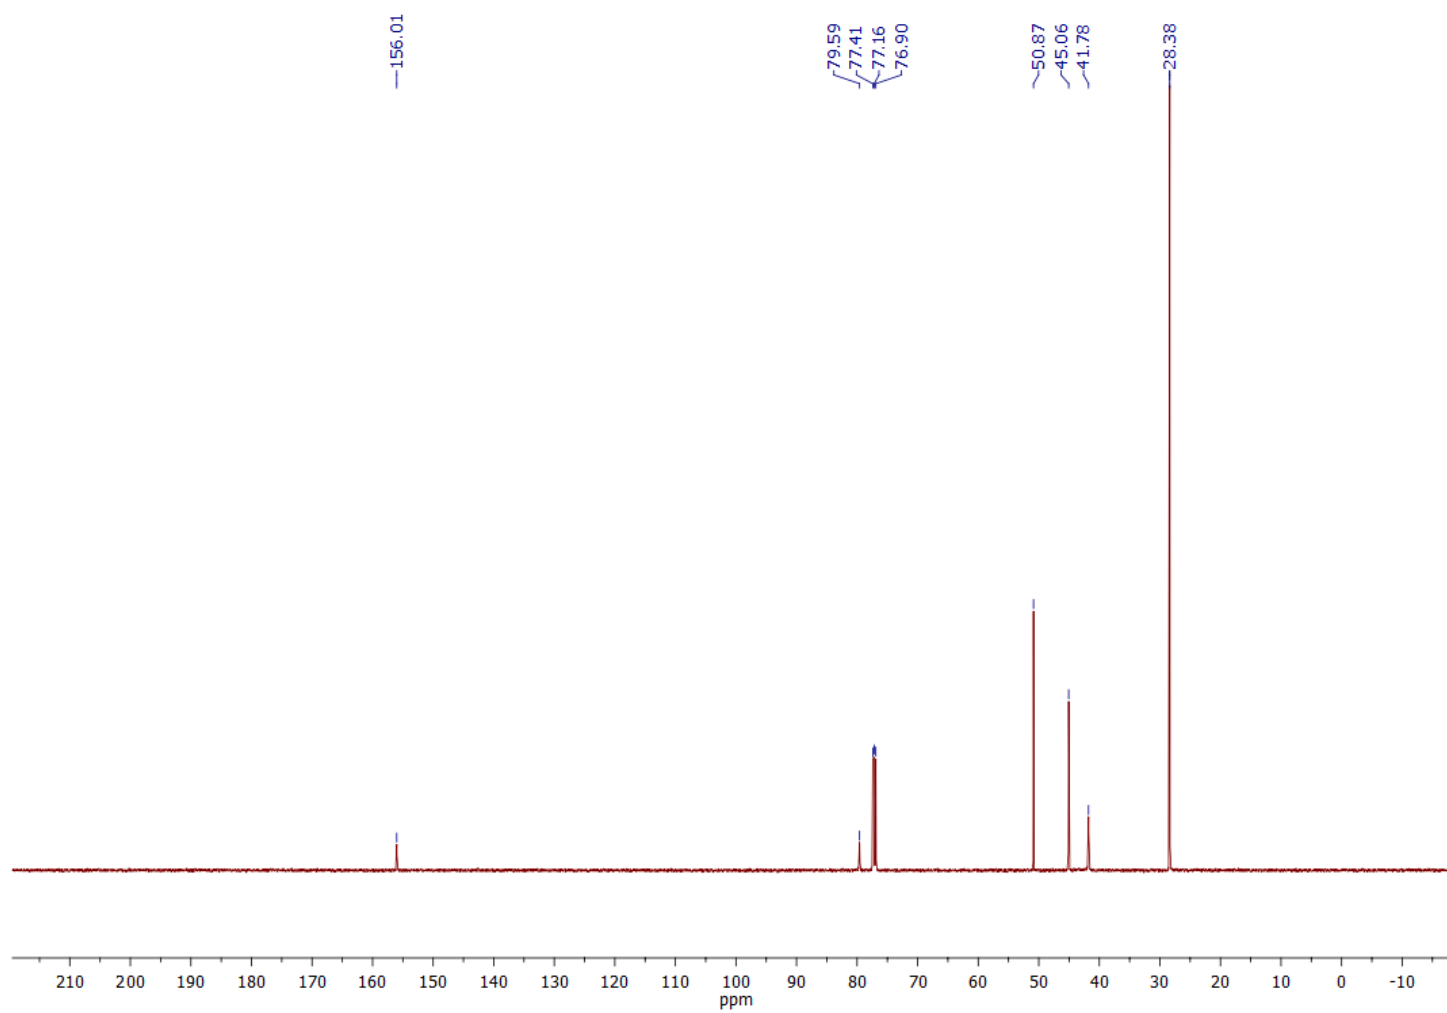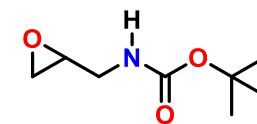

Figure S 23:  $^{13}\text{C}$ -NMR of *t*BOMC in  $\text{CDCl}_3$  at 303 K.



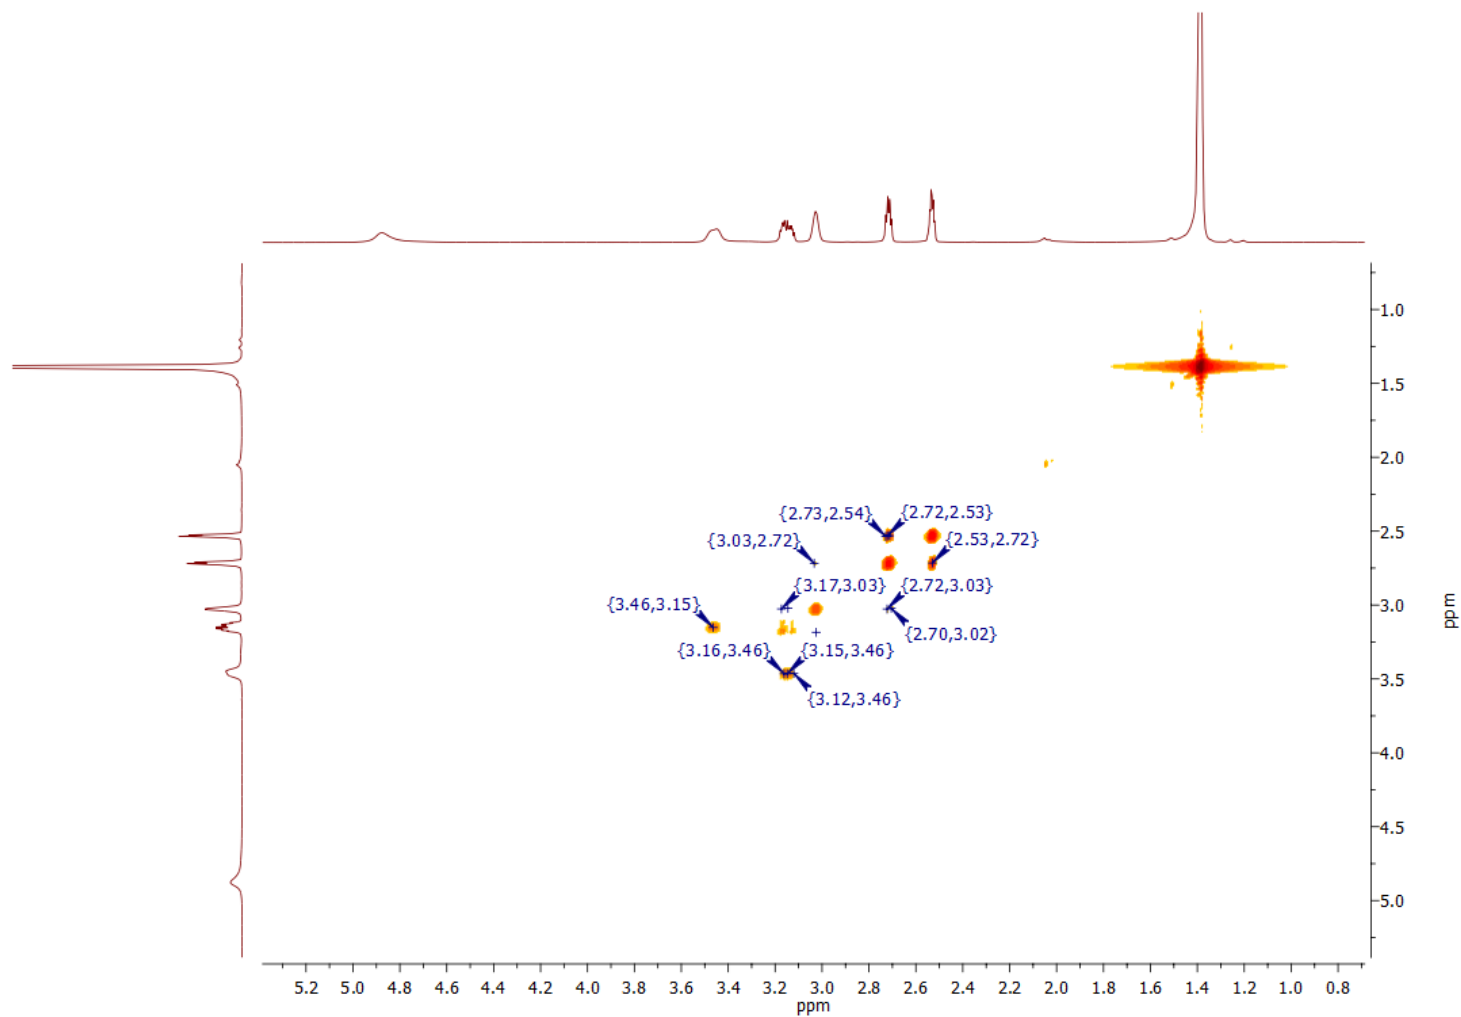

Figure S 24:  $^1\text{H}$ - $^1\text{H}$ -COSY of **tBOMC** in  $\text{CDCl}_3$  at 303 K

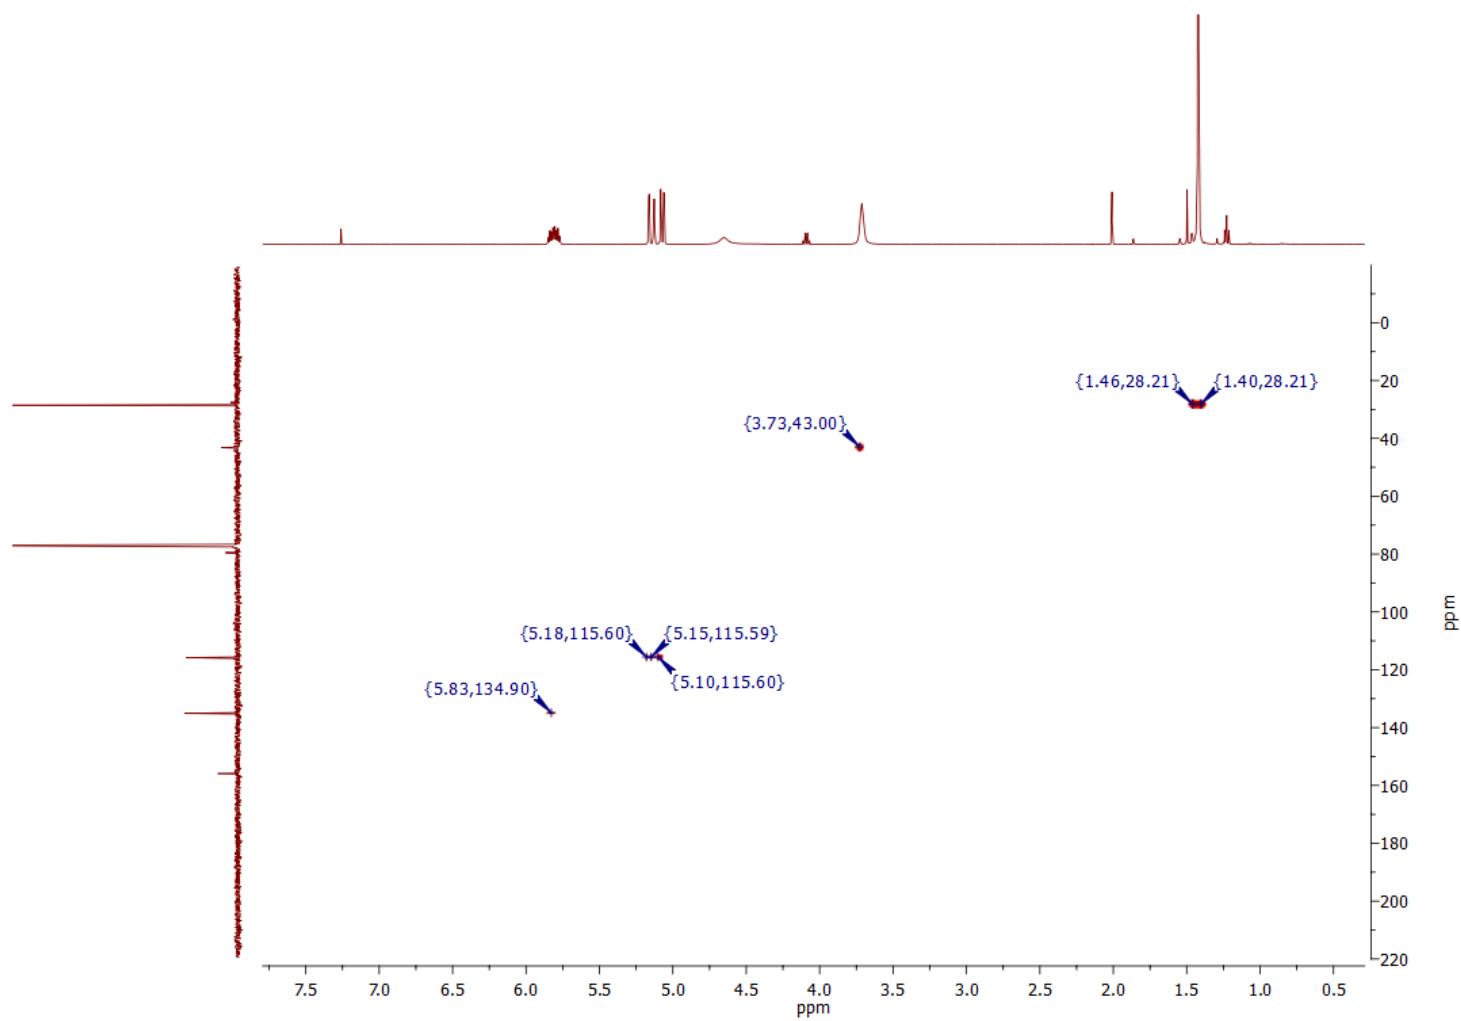

Figure S 25:  $^1\text{H}$ - $^{13}\text{C}$ -HSQC of *t*BOMC in  $\text{CDCl}_3$  at 303 K

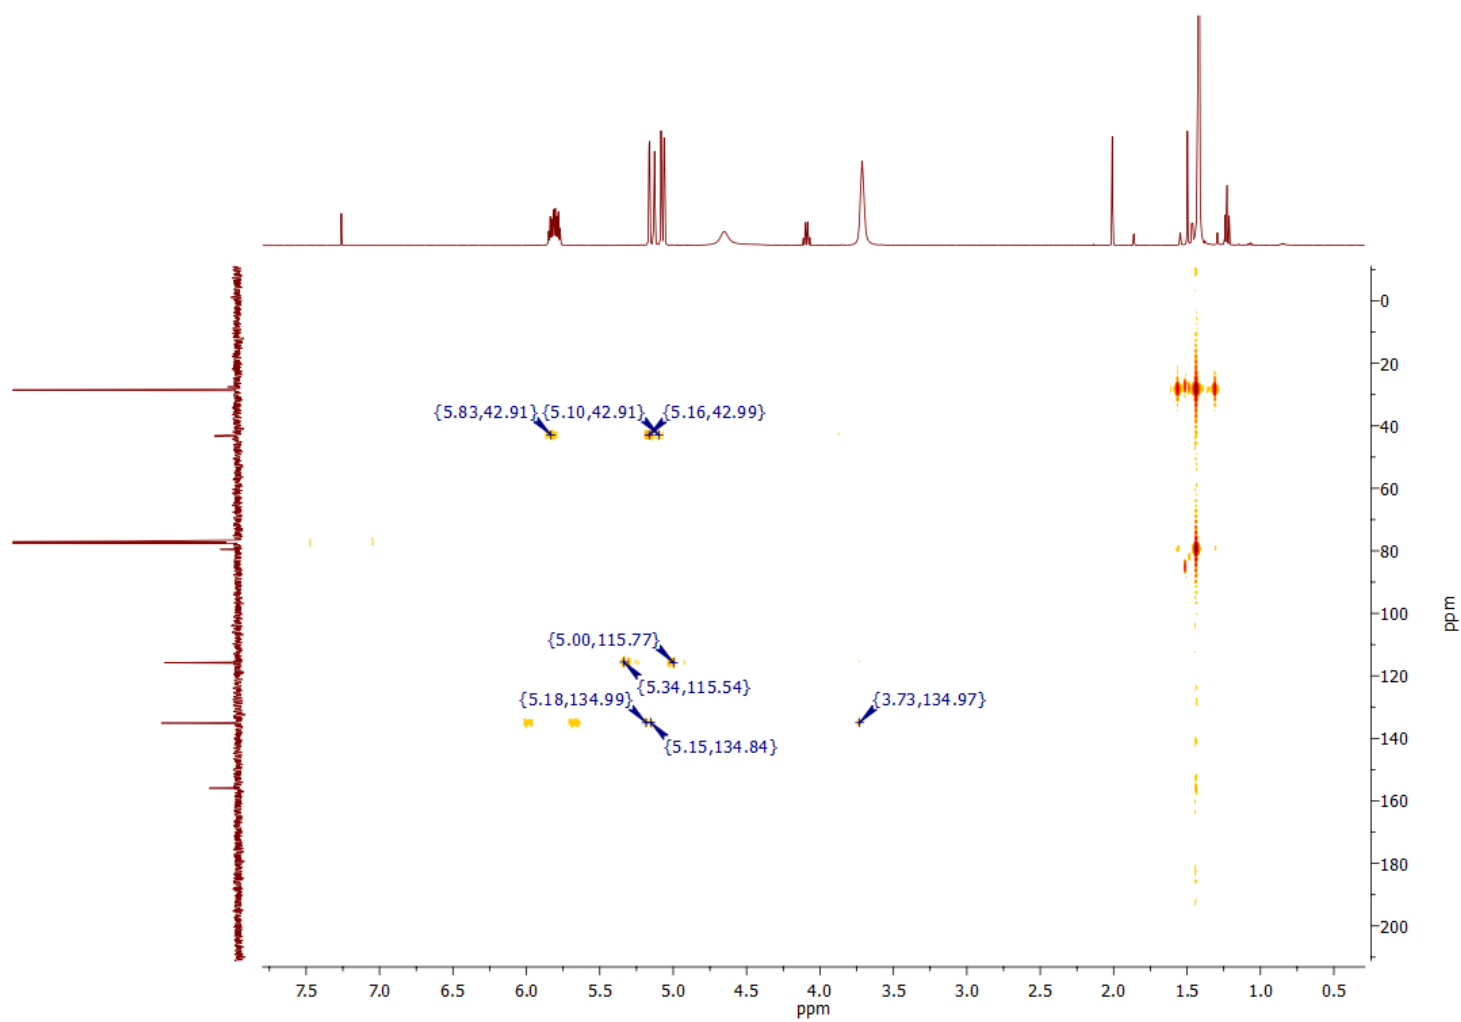

Figure S 26:  $^1\text{H}$ - $^{13}\text{C}$ -HMBC of *tBOMC* in  $\text{CDCl}_3$  at 303 K

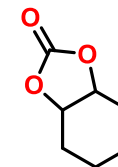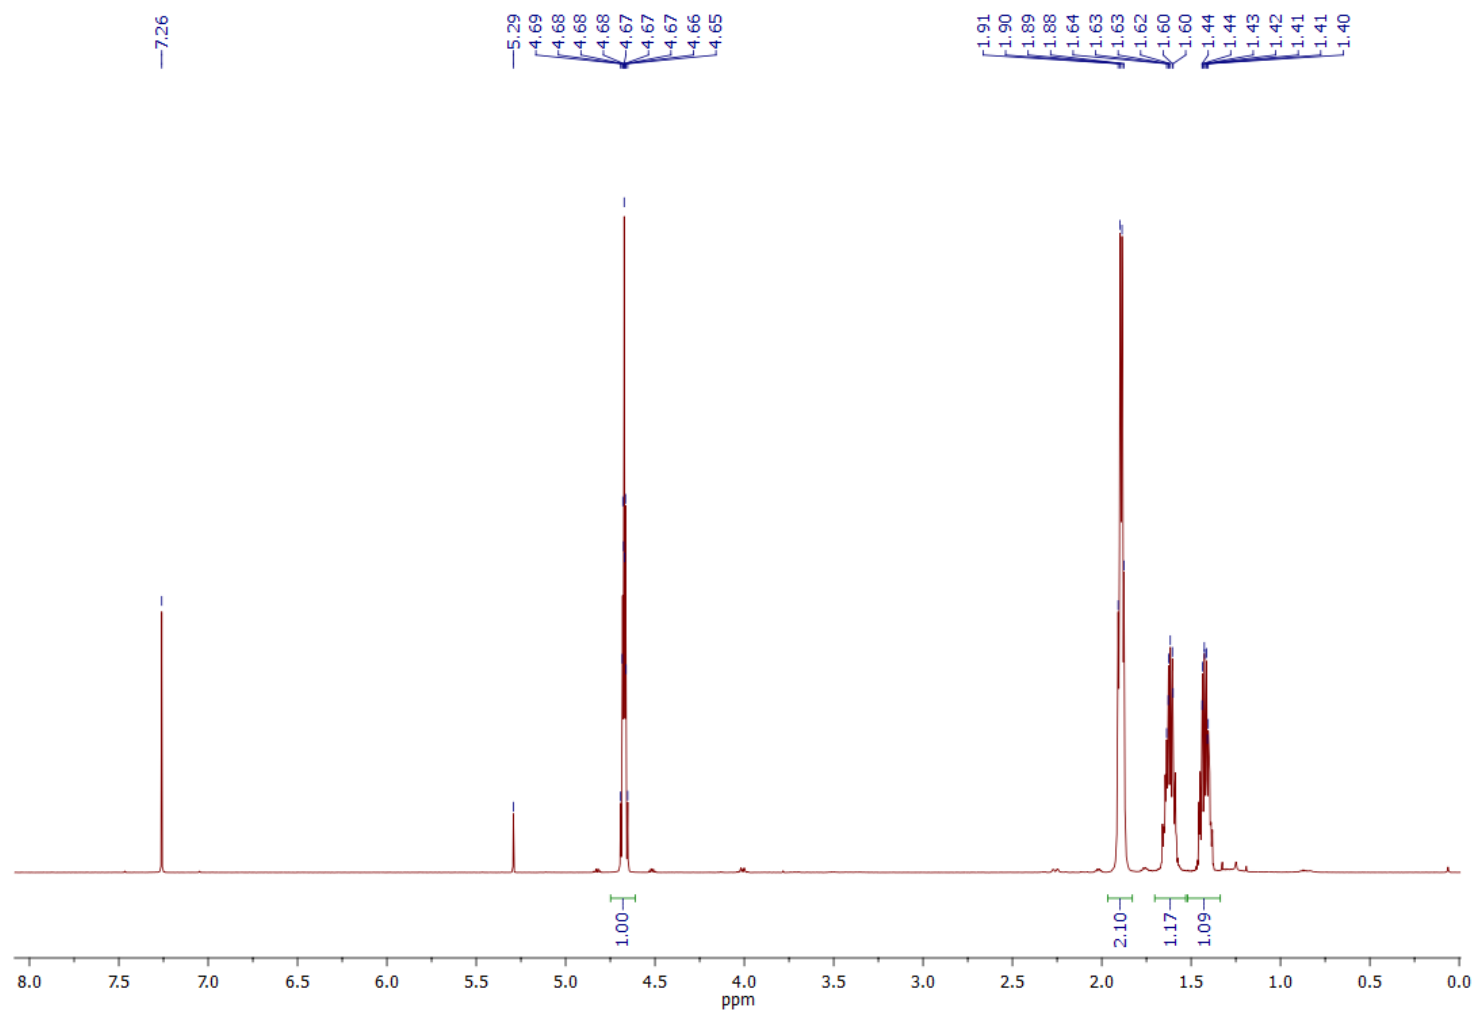

Figure S 27:  $^1\text{H}$ -NMR of **5a** in  $\text{CDCl}_3$  at 303K.

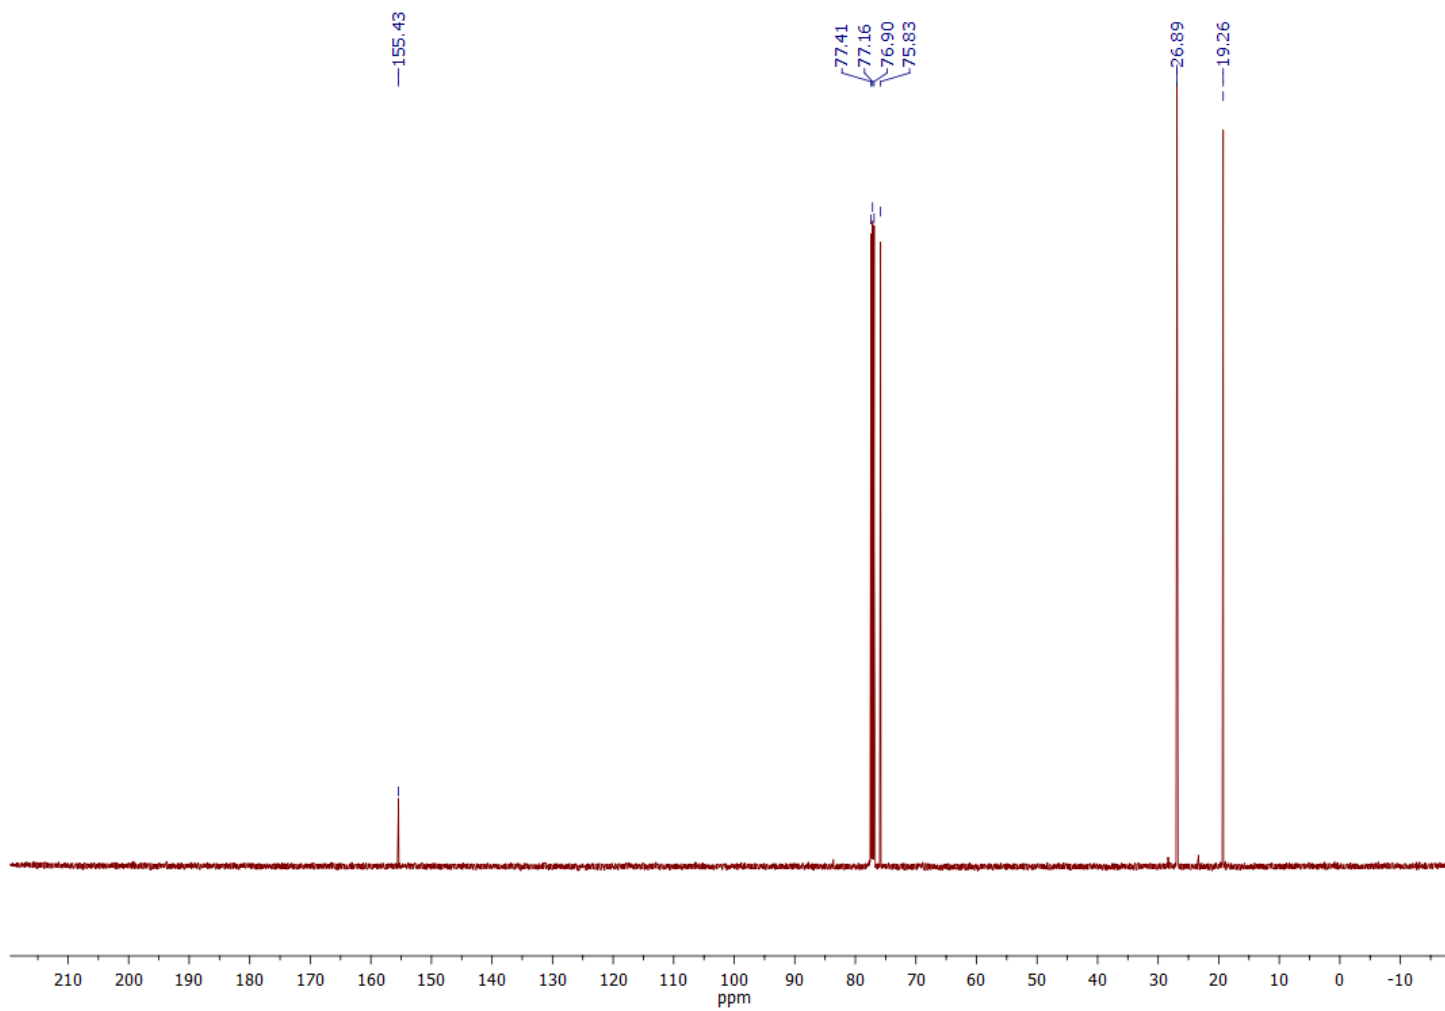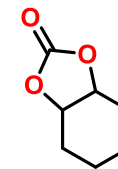

Figure S 28:  $^{13}\text{C}$ -NMR of **5a** in  $\text{CDCl}_3$  at 303K.

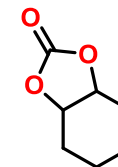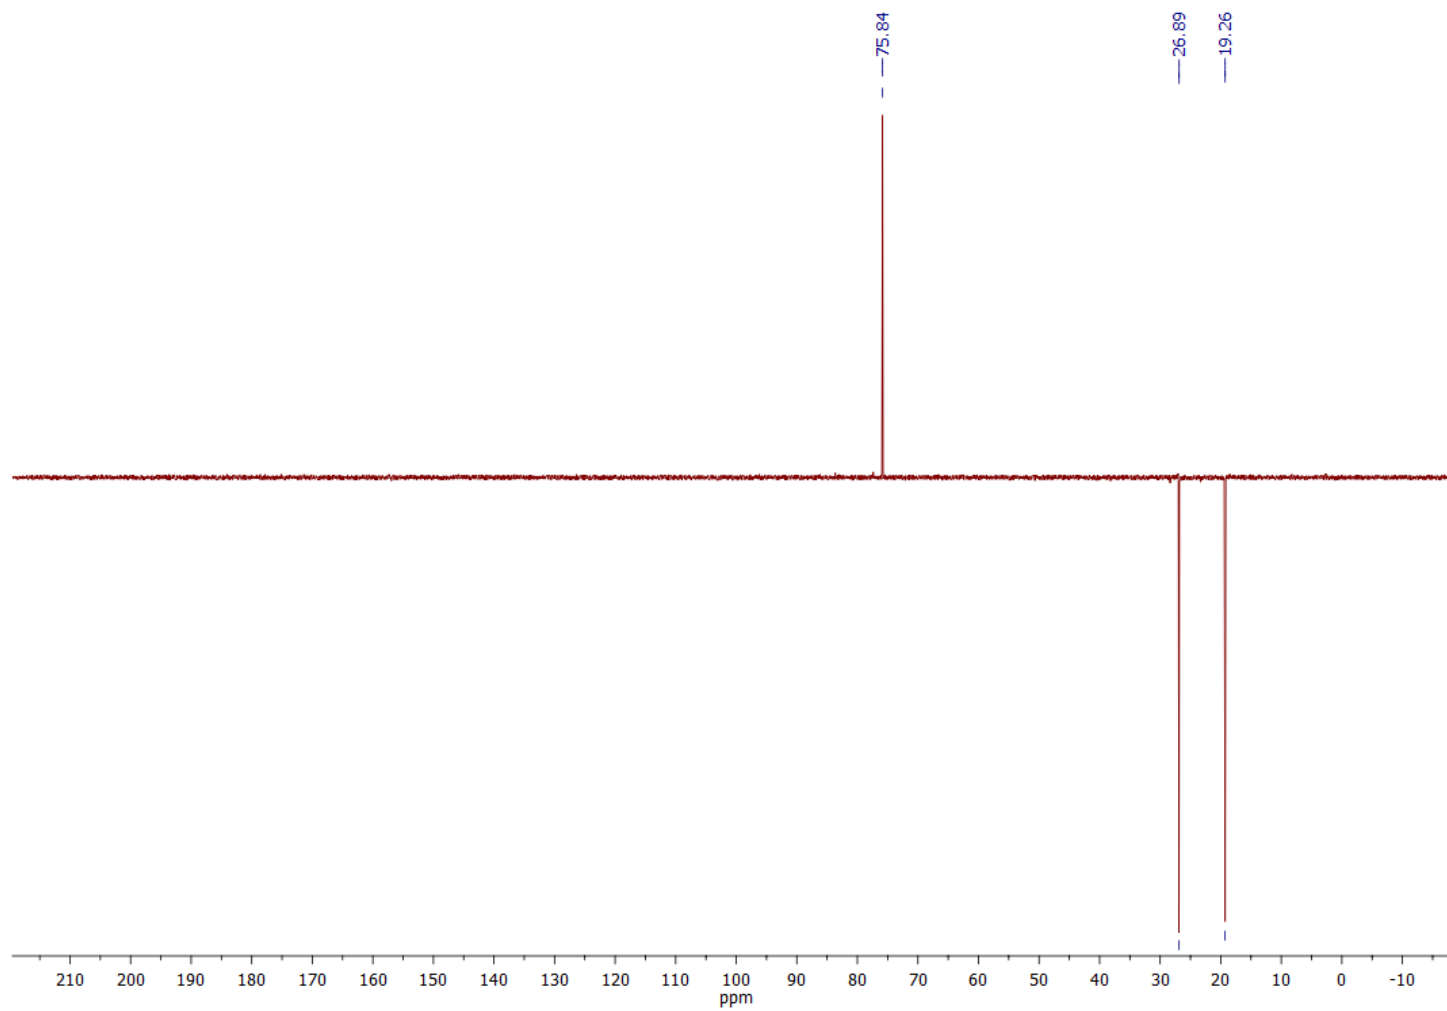

Figure S 29: DEPT135-NMR of **5a** in  $\text{CDCl}_3$  at 303K.

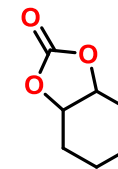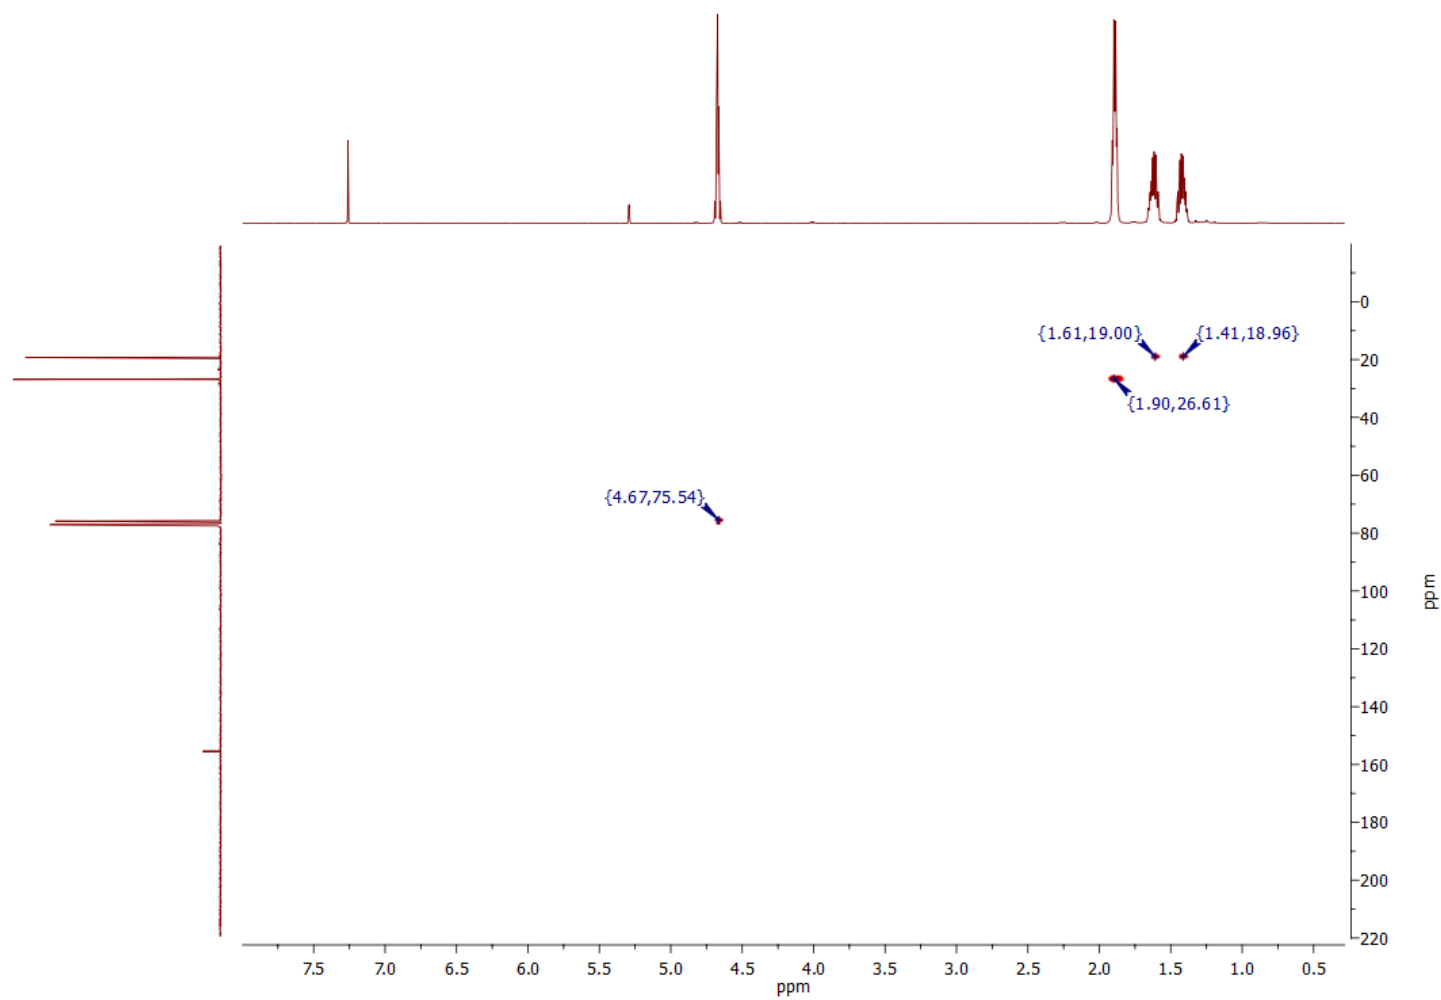

Figure S 30: <sup>1</sup>H-<sup>13</sup>C-HSQC-NMR of **5a** in CDCl<sub>3</sub> at 303K.

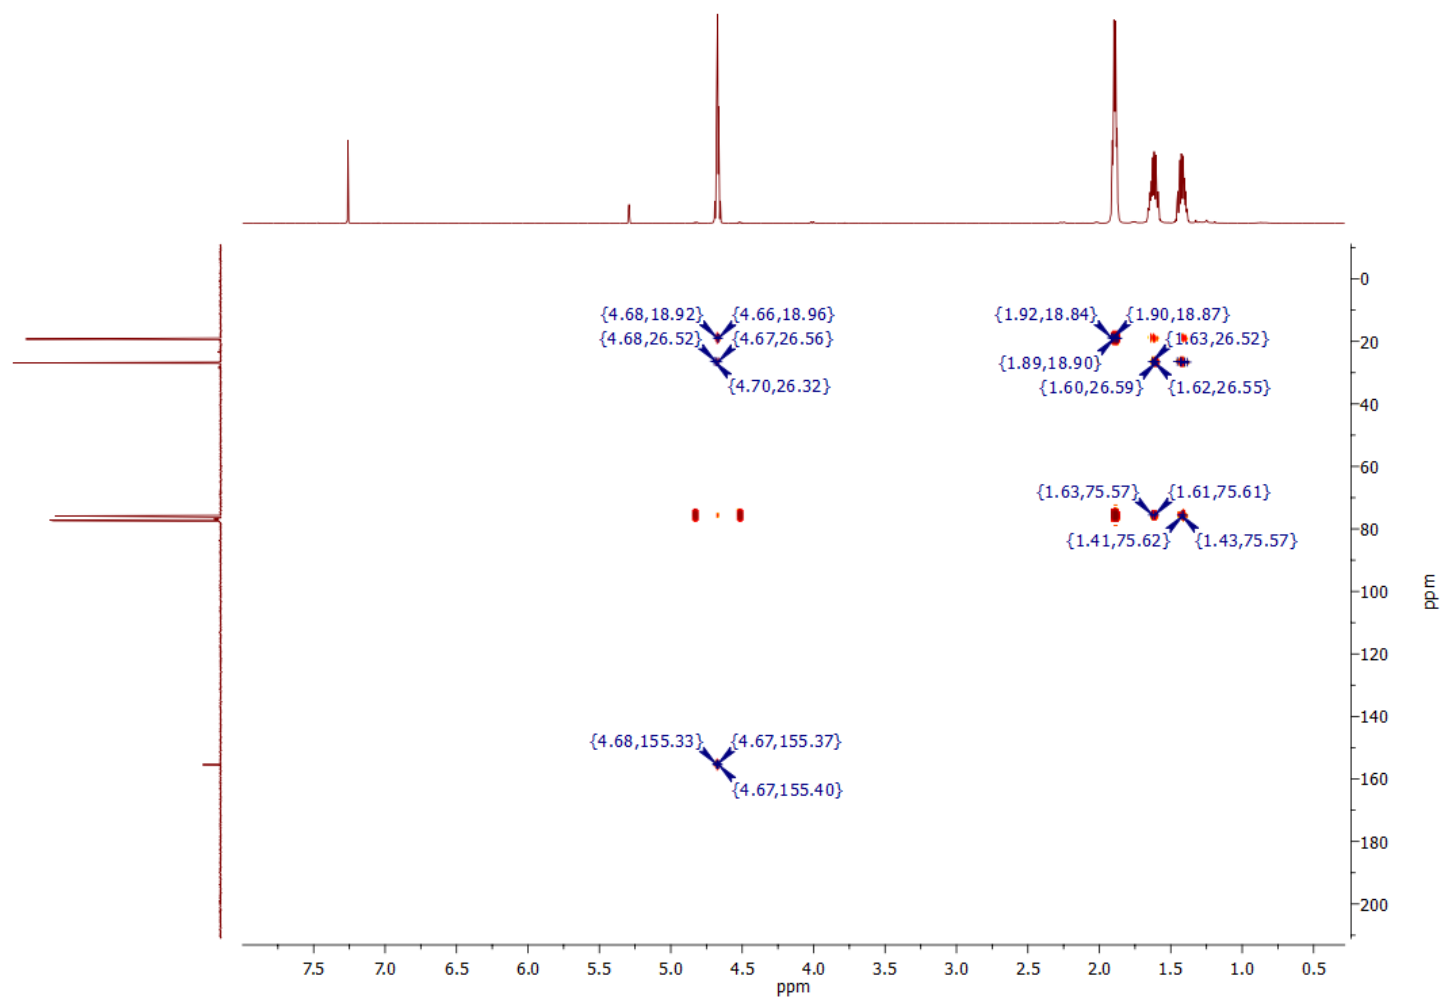

Figure S 31:  $^1\text{H}$ - $^{13}\text{C}$ -HMBC-NMR of **5a** in  $\text{CDCl}_3$  at 303K.



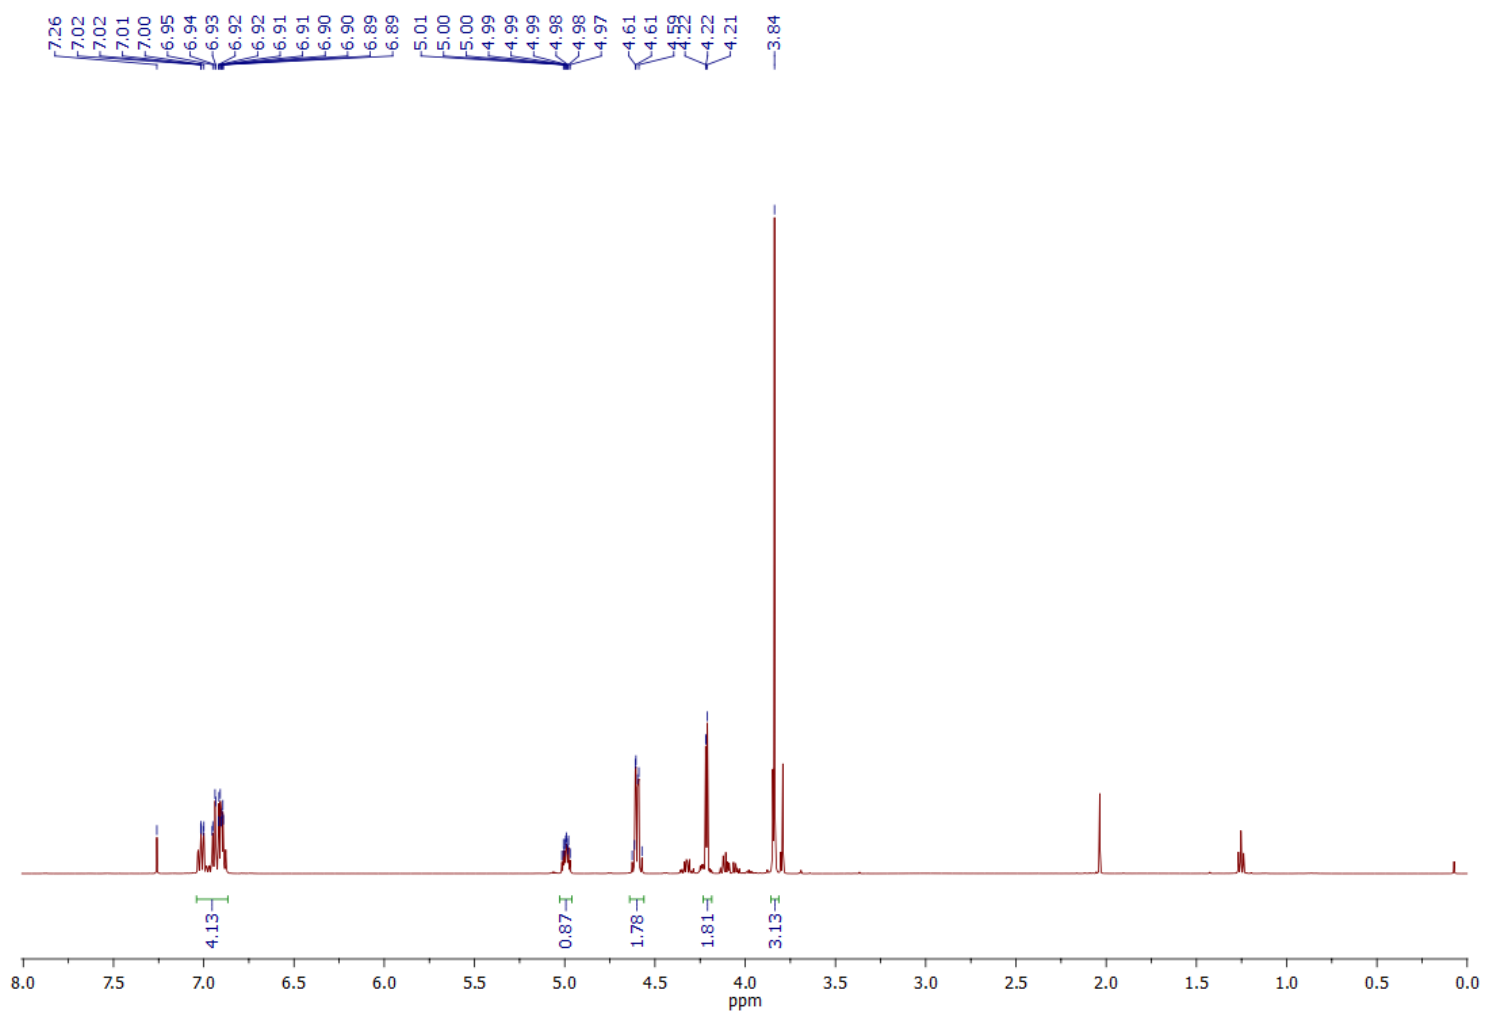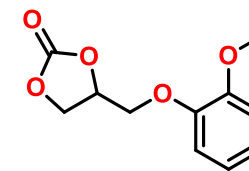

Figure S 32:  $^1\text{H}$ -NMR of **5b** in  $\text{CDCl}_3$  at 303 K. Impurities of ethyl acetate and a small amount unknown byproduct are present.

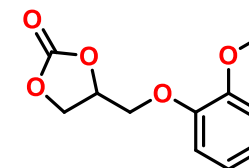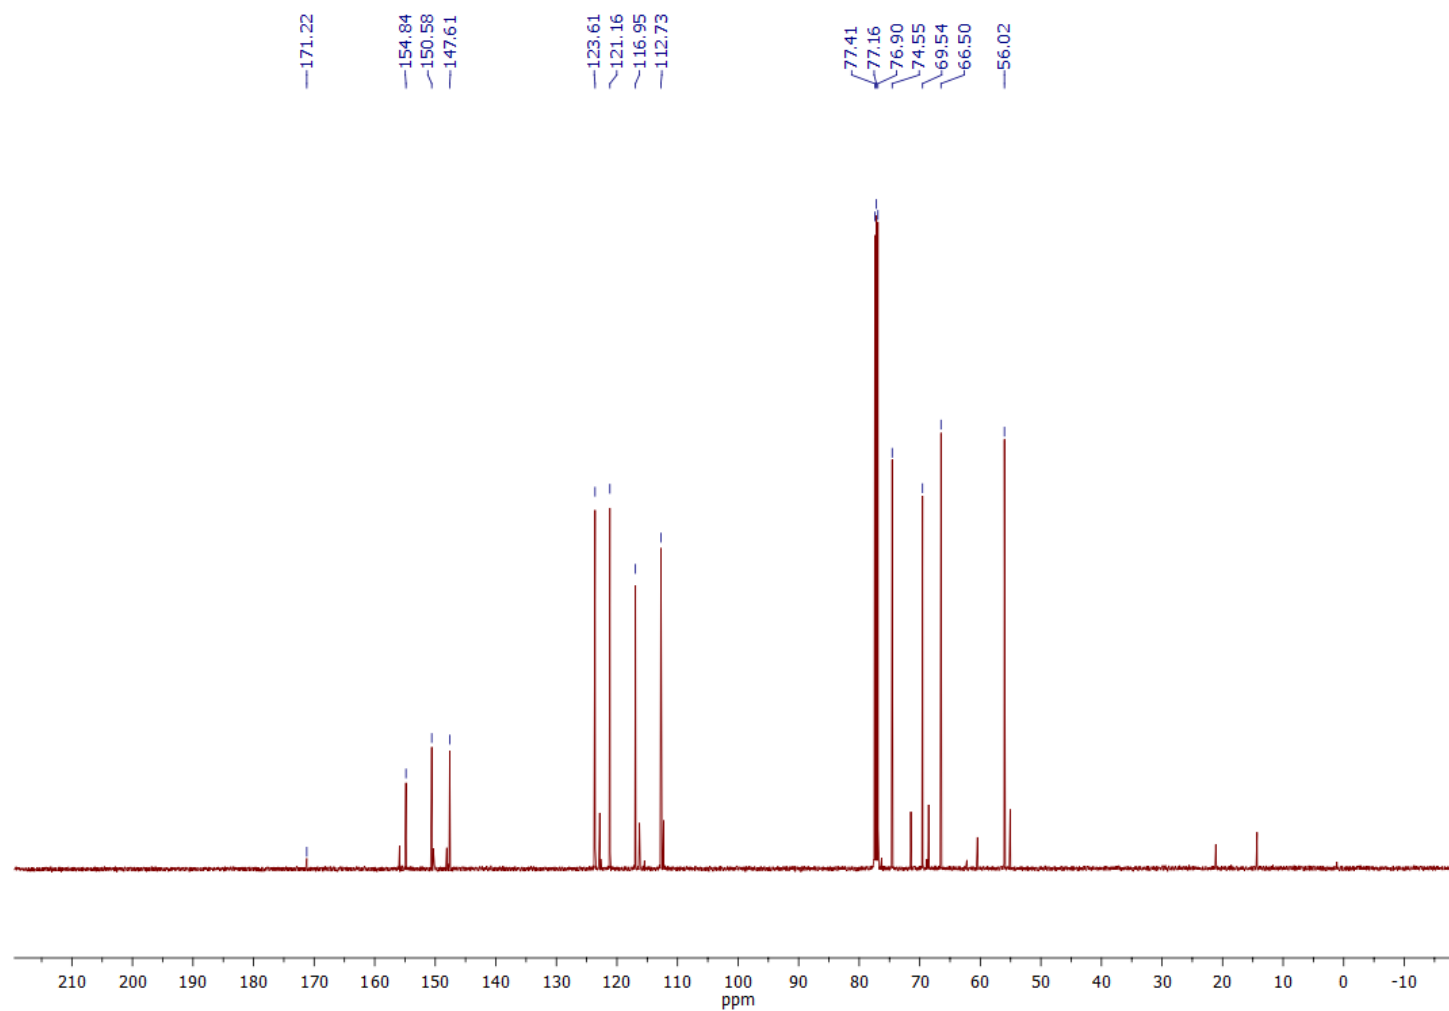

Figure S 33:  $^{13}\text{C}$ -NMR of **5b** in  $\text{CDCl}_3$  at 303 K. Impurities of ethyl acetate and a small amount unknown byproduct are present.

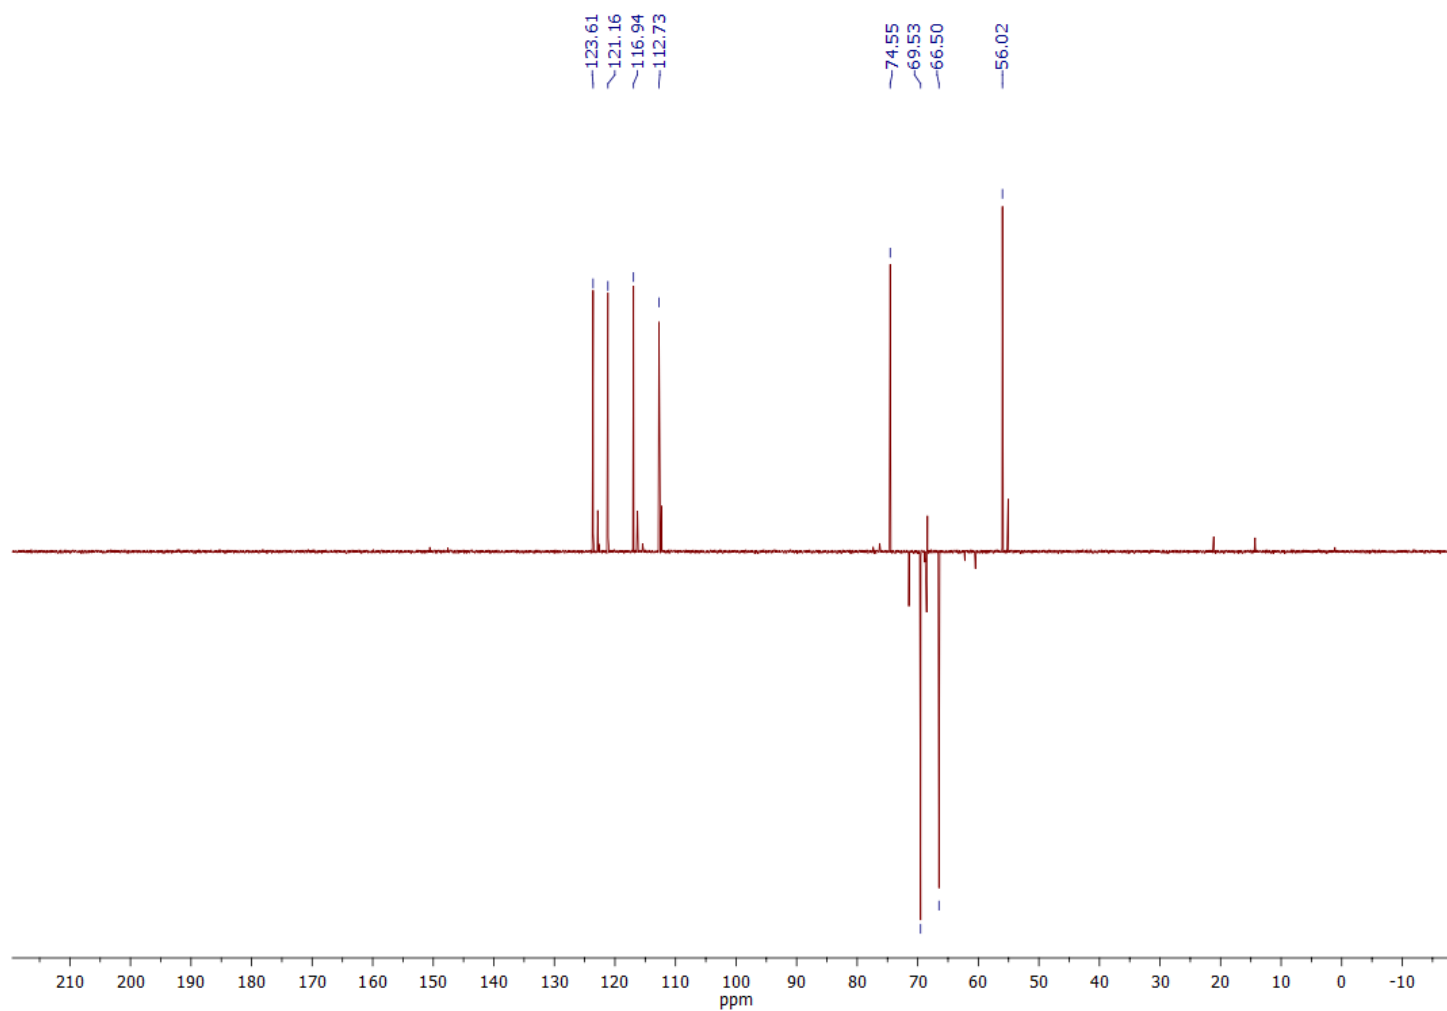

Figure S 34: DEPT135-NMR of **5b** in  $\text{CDCl}_3$  at 303 K. Impurities of ethyl acetate and a small amount unknown byproduct are present.

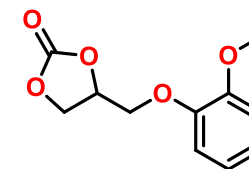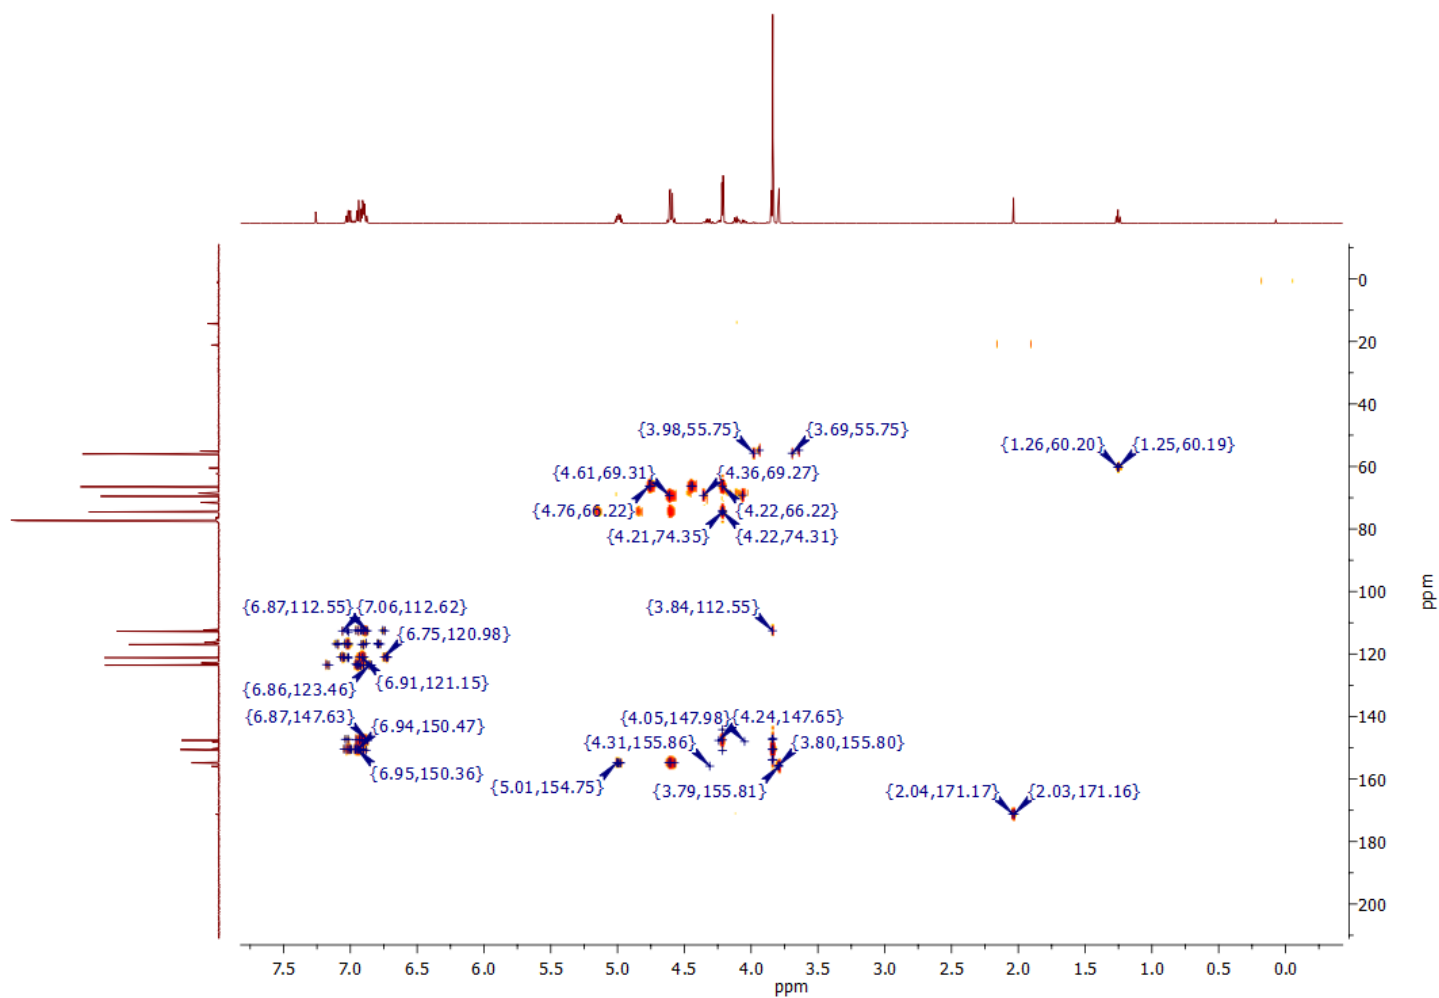

Figure S 35: <sup>1</sup>H-<sup>13</sup>C-HMBC-NMR of **5b** in CDCl<sub>3</sub> at 303 K. Impurities of ethyl acetate and a small amount unknown byproduct are present.

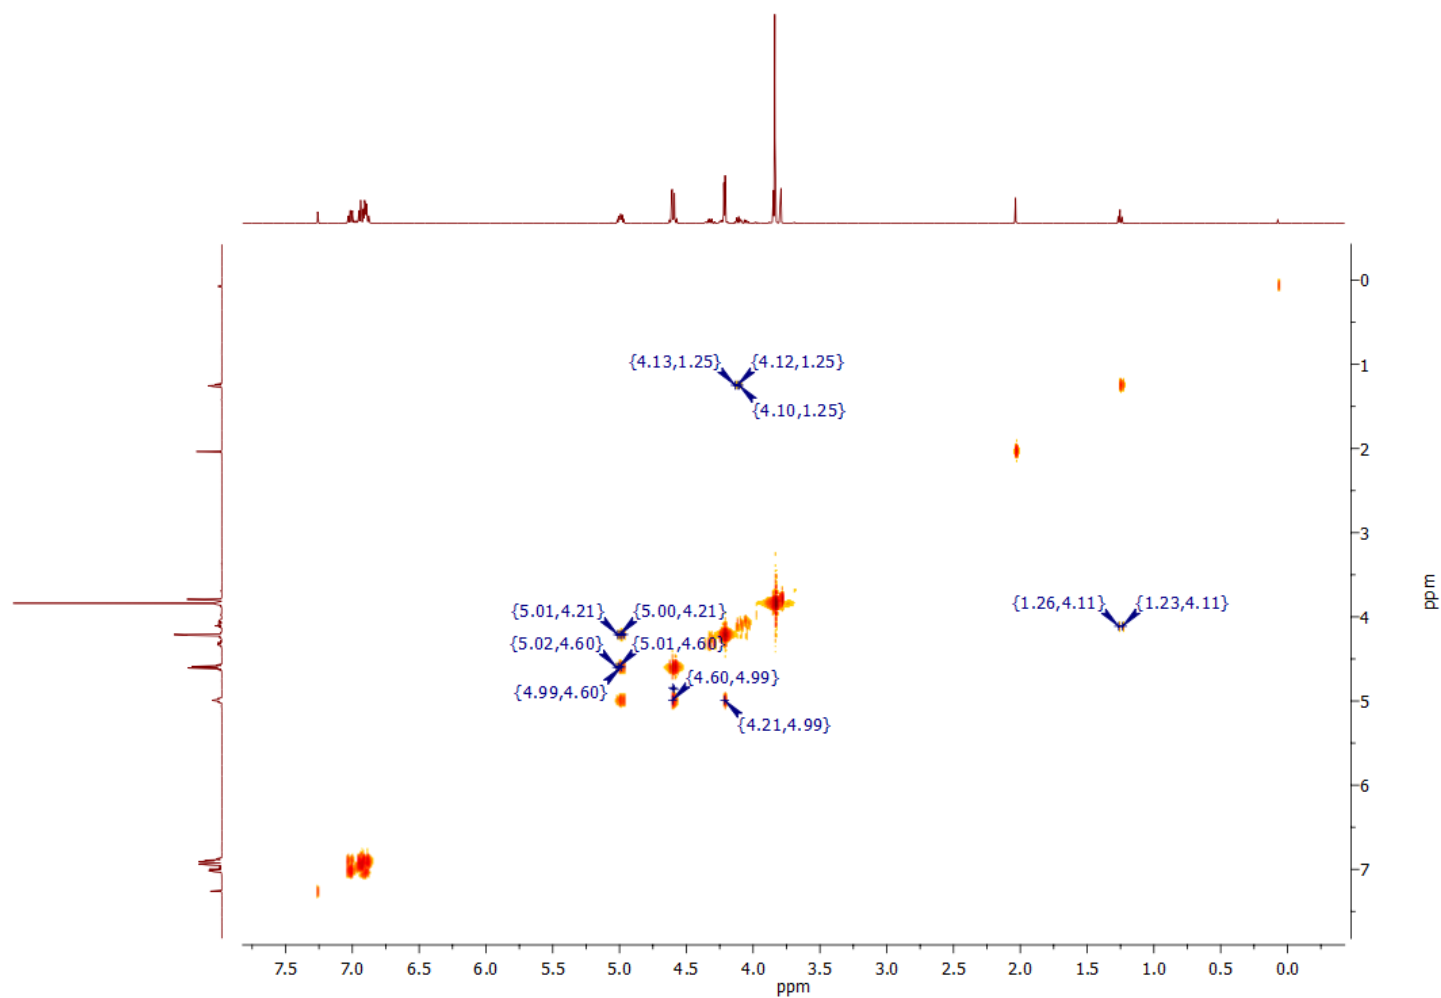

Figure S 36:  $^1\text{H}$ - $^1\text{H}$ -COSY-NMR of **5b** in  $\text{CDCl}_3$  at 303 K. Impurities of ethyl acetate and a small amount unknown byproduct are present.

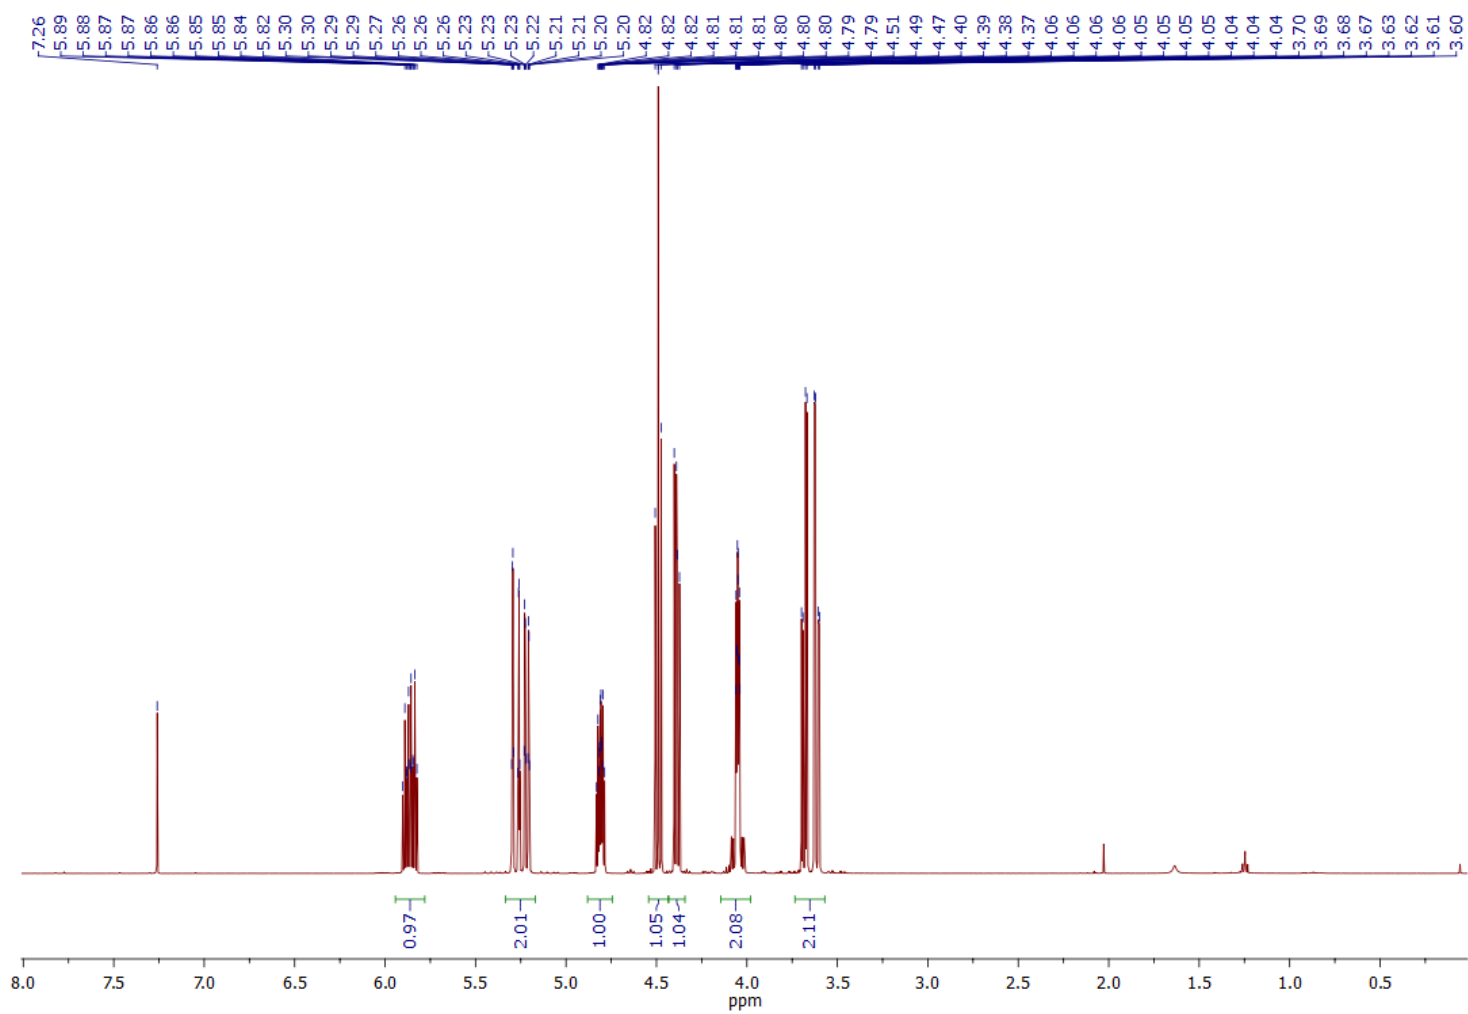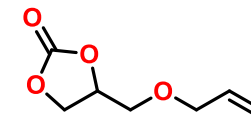

Figure S 37: <sup>1</sup>H-NMR of **5c** in CDCl<sub>3</sub> at 303 K. Impurities of cyclohexane and ethyl acetate are present.

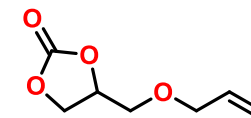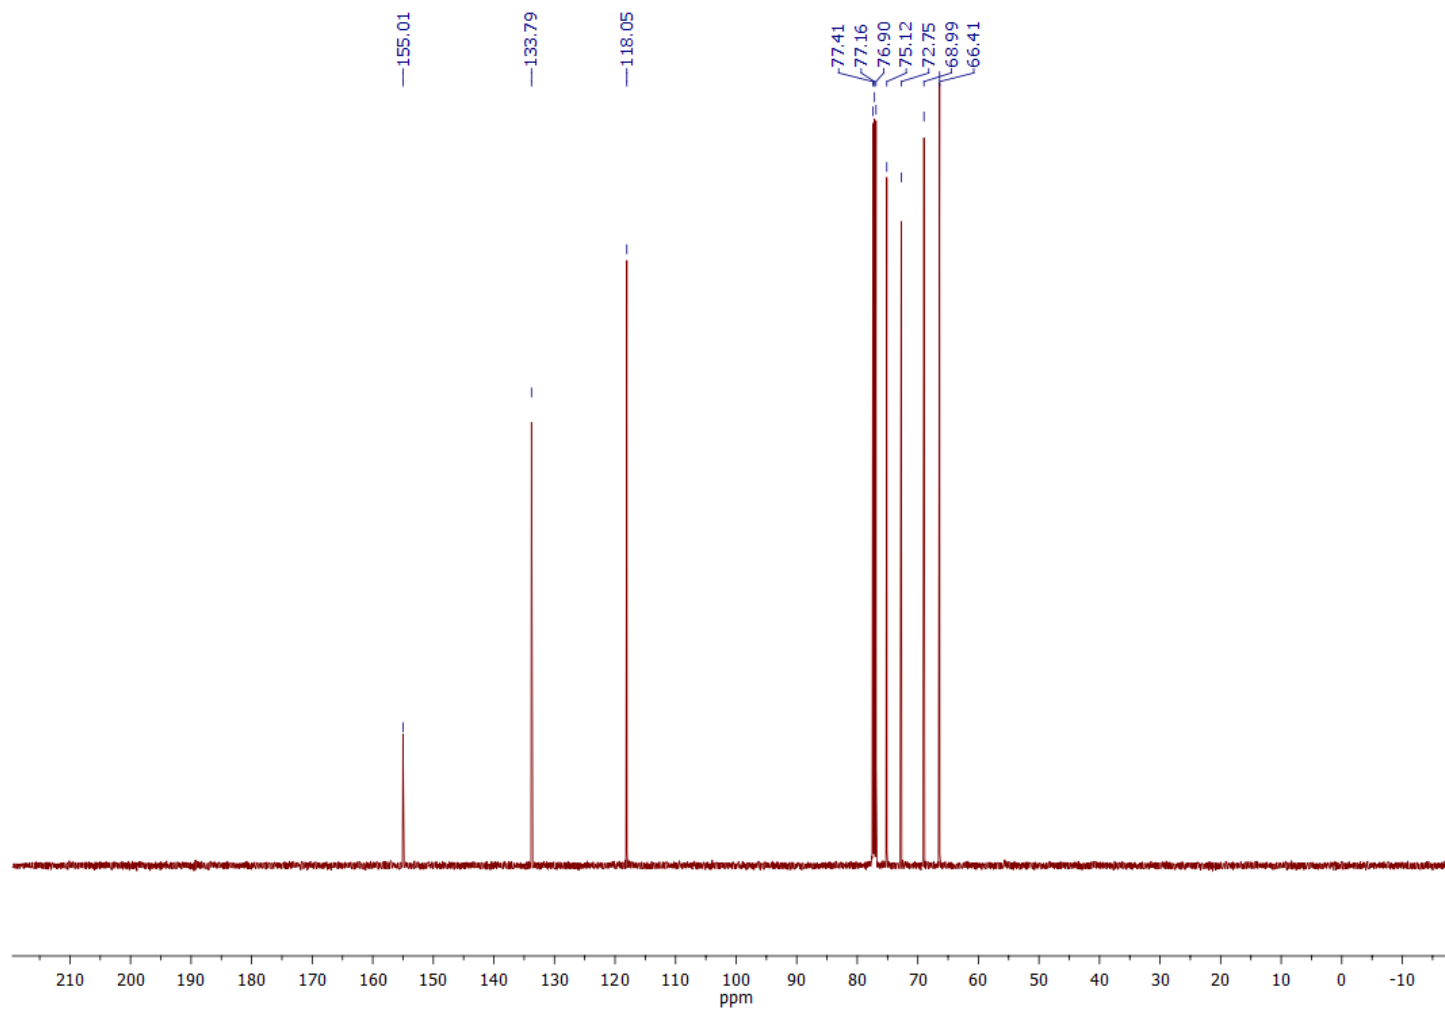

Figure S 38: <sup>13</sup>C-NMR of 5c in CDCl<sub>3</sub> at 303 K.

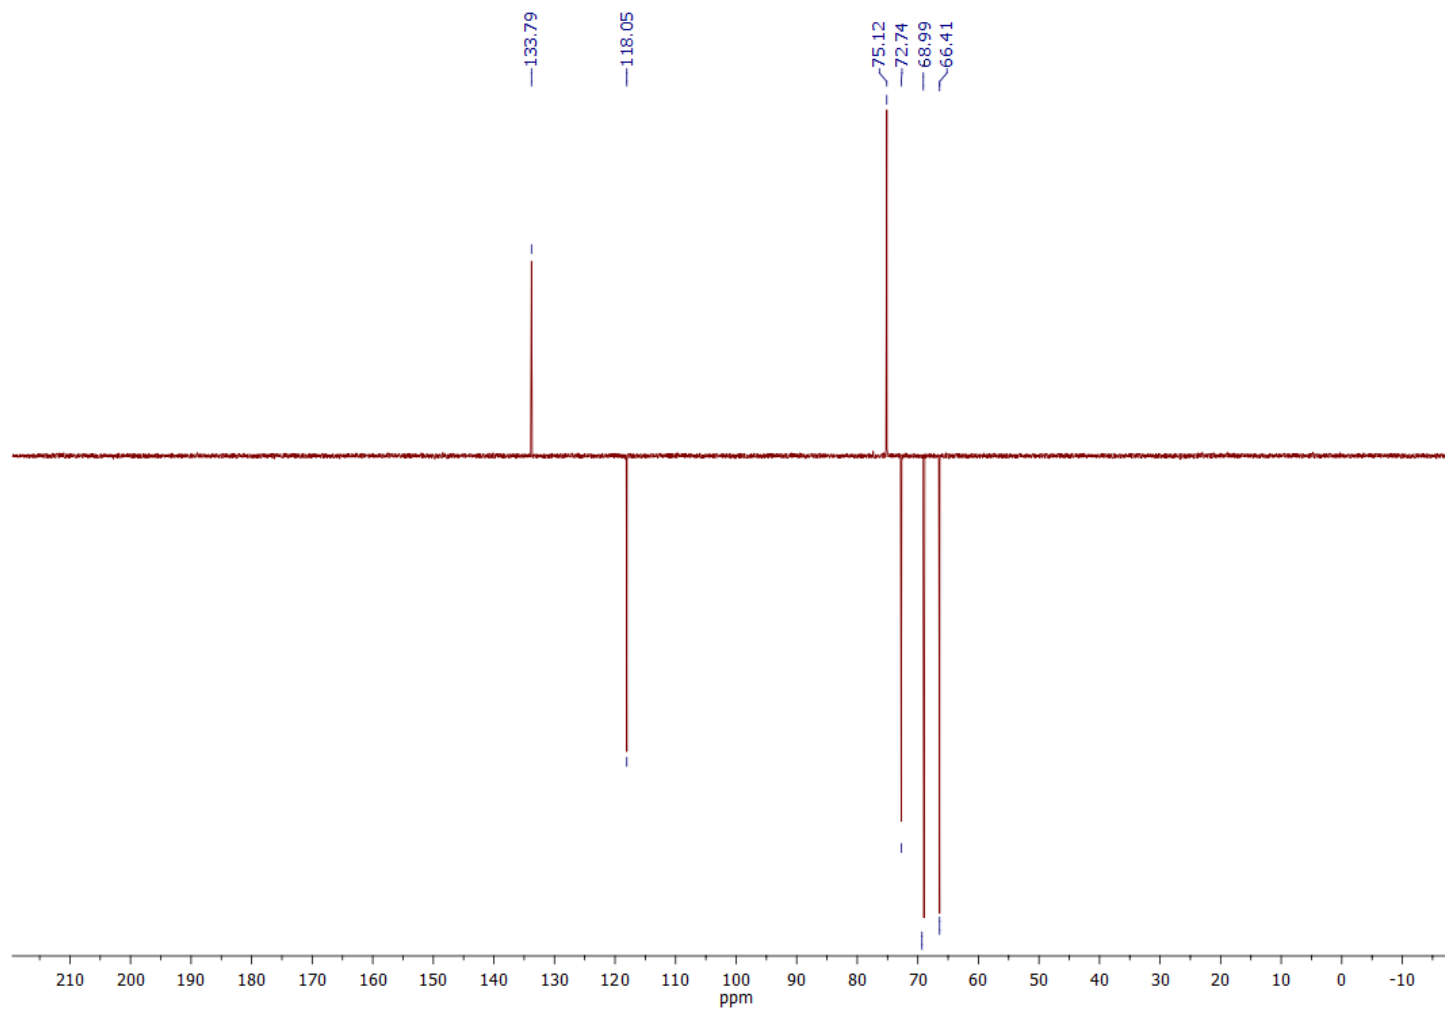

Figure S 39: DEPT135-NMR of **5c** in  $\text{CDCl}_3$  at 303 K.



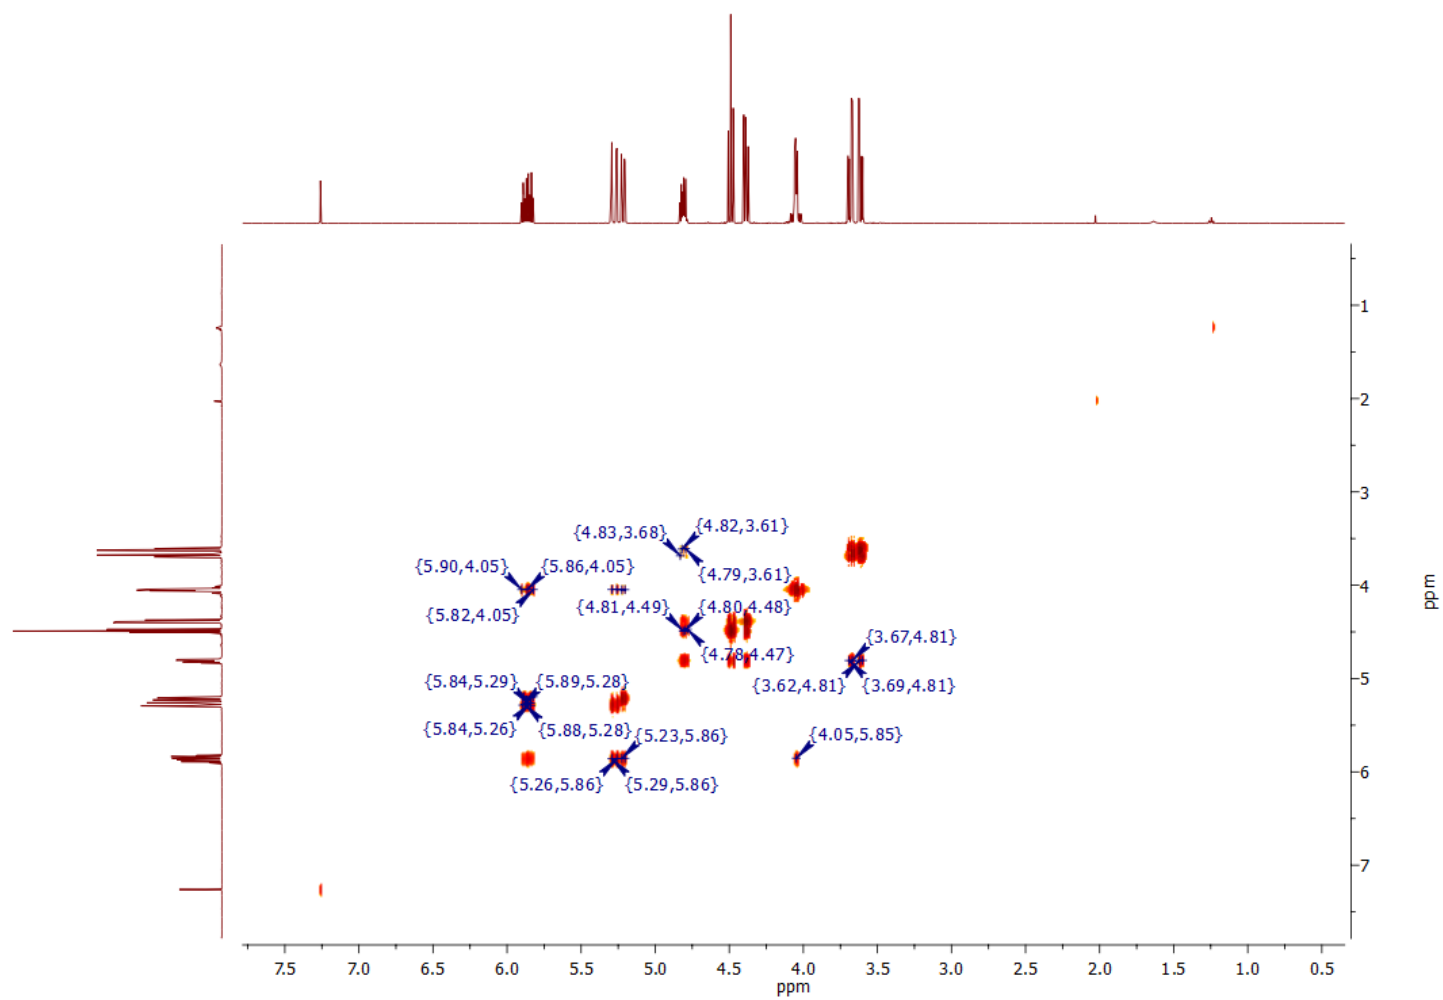

Figure S 40:  $^1\text{H}$ - $^1\text{H}$ -COSY-NMR of **5c** in  $\text{CDCl}_3$  at 303 K.

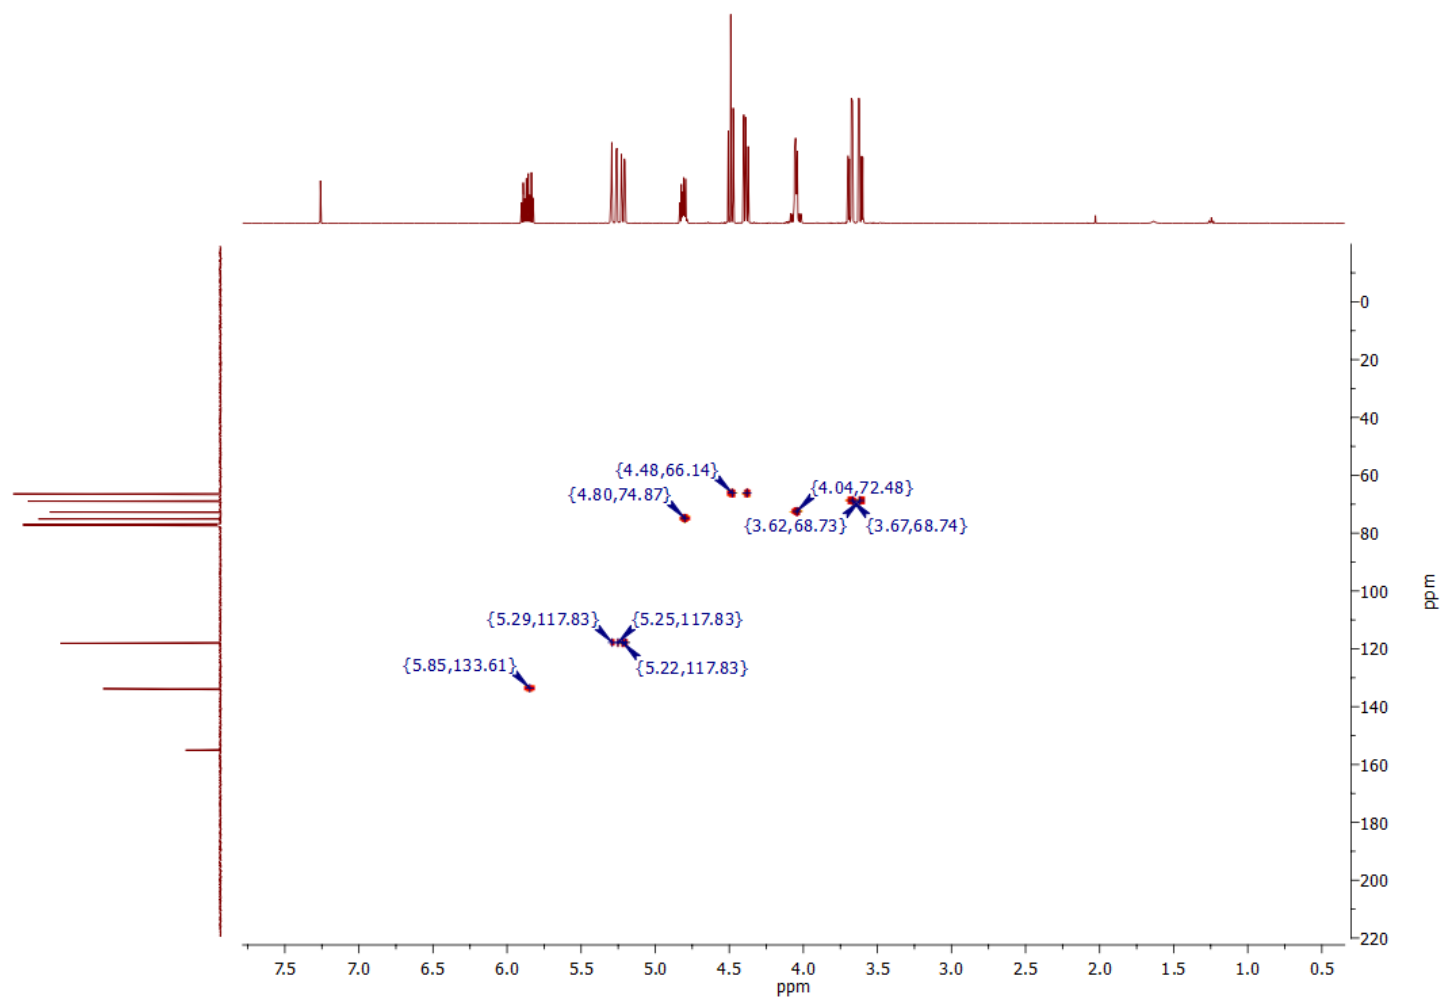

Figure S 41:  $^1\text{H}$ - $^{13}\text{C}$ -HSQC-NMR of **5c** in  $\text{CDCl}_3$  at 303 K.

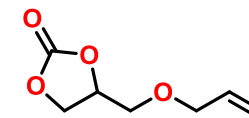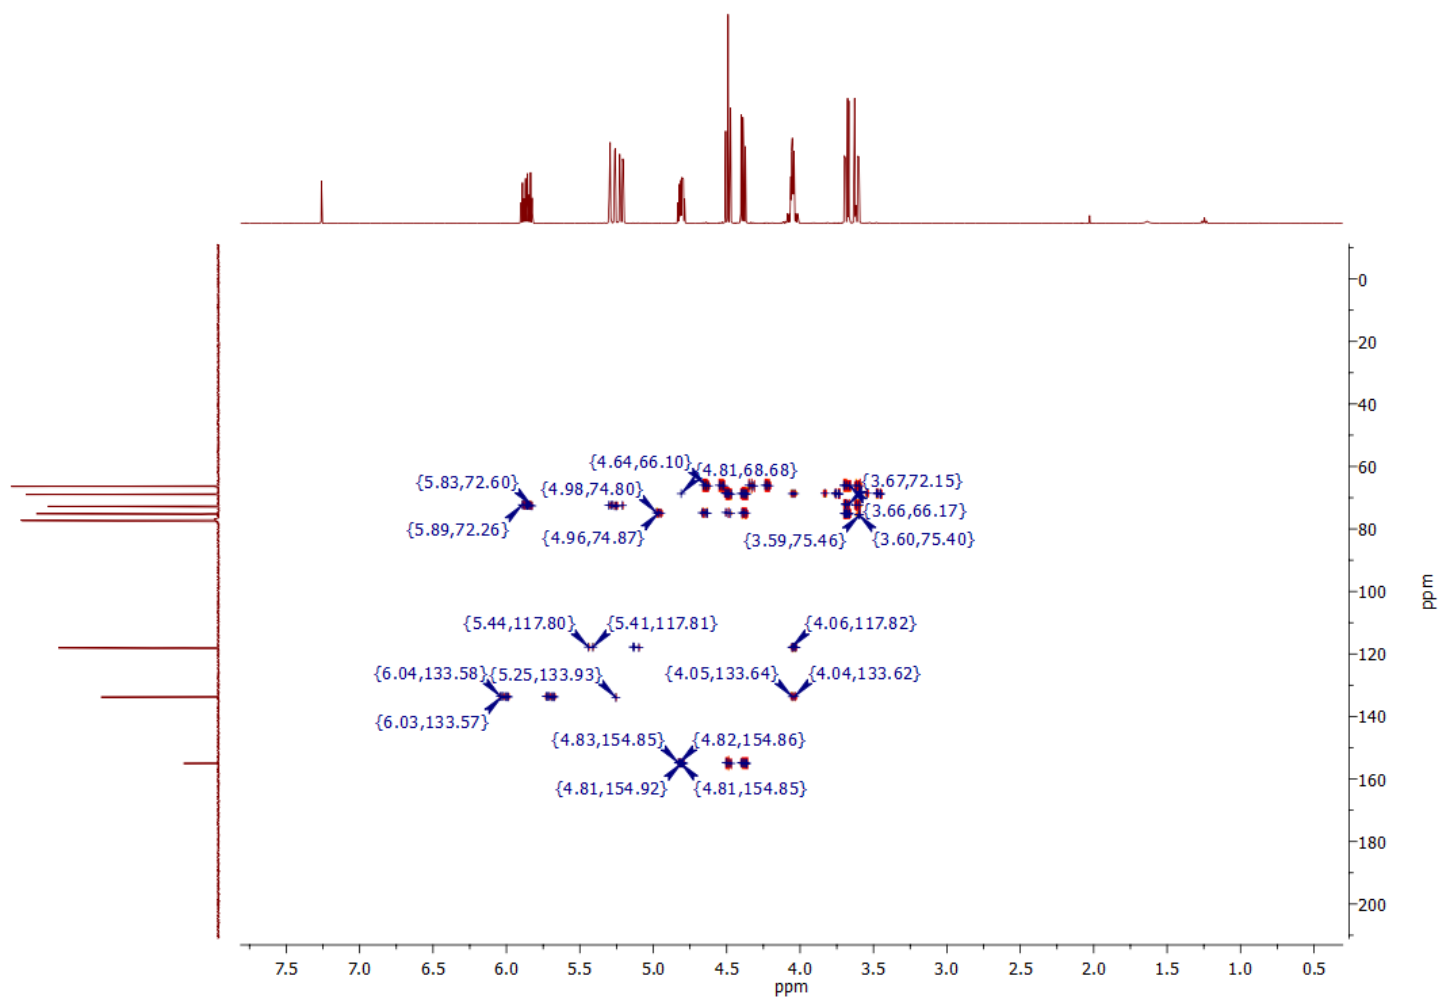

Figure S 42:  $^1\text{H}$ - $^{13}\text{C}$ -HMBC-NMR of **5c** in  $\text{CDCl}_3$  at 303 K.

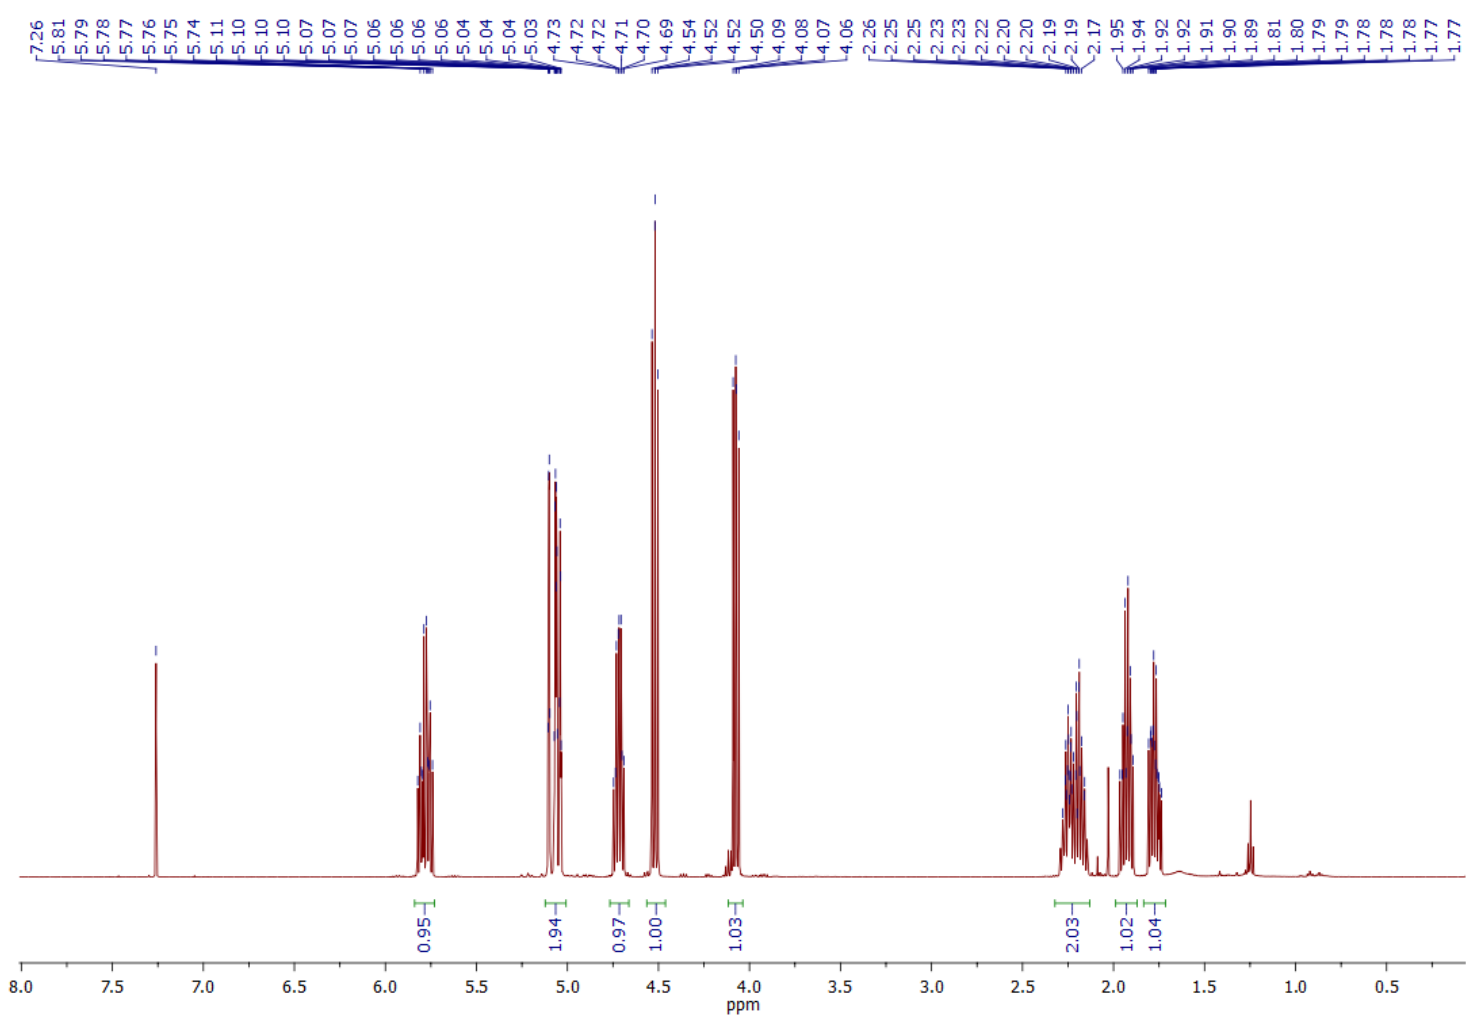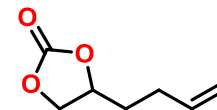

Figure S 43: <sup>1</sup>H-NMR of **5d** in CDCl<sub>3</sub> at 303 K. Impurities of cyclohexane and ethyl acetate are present.

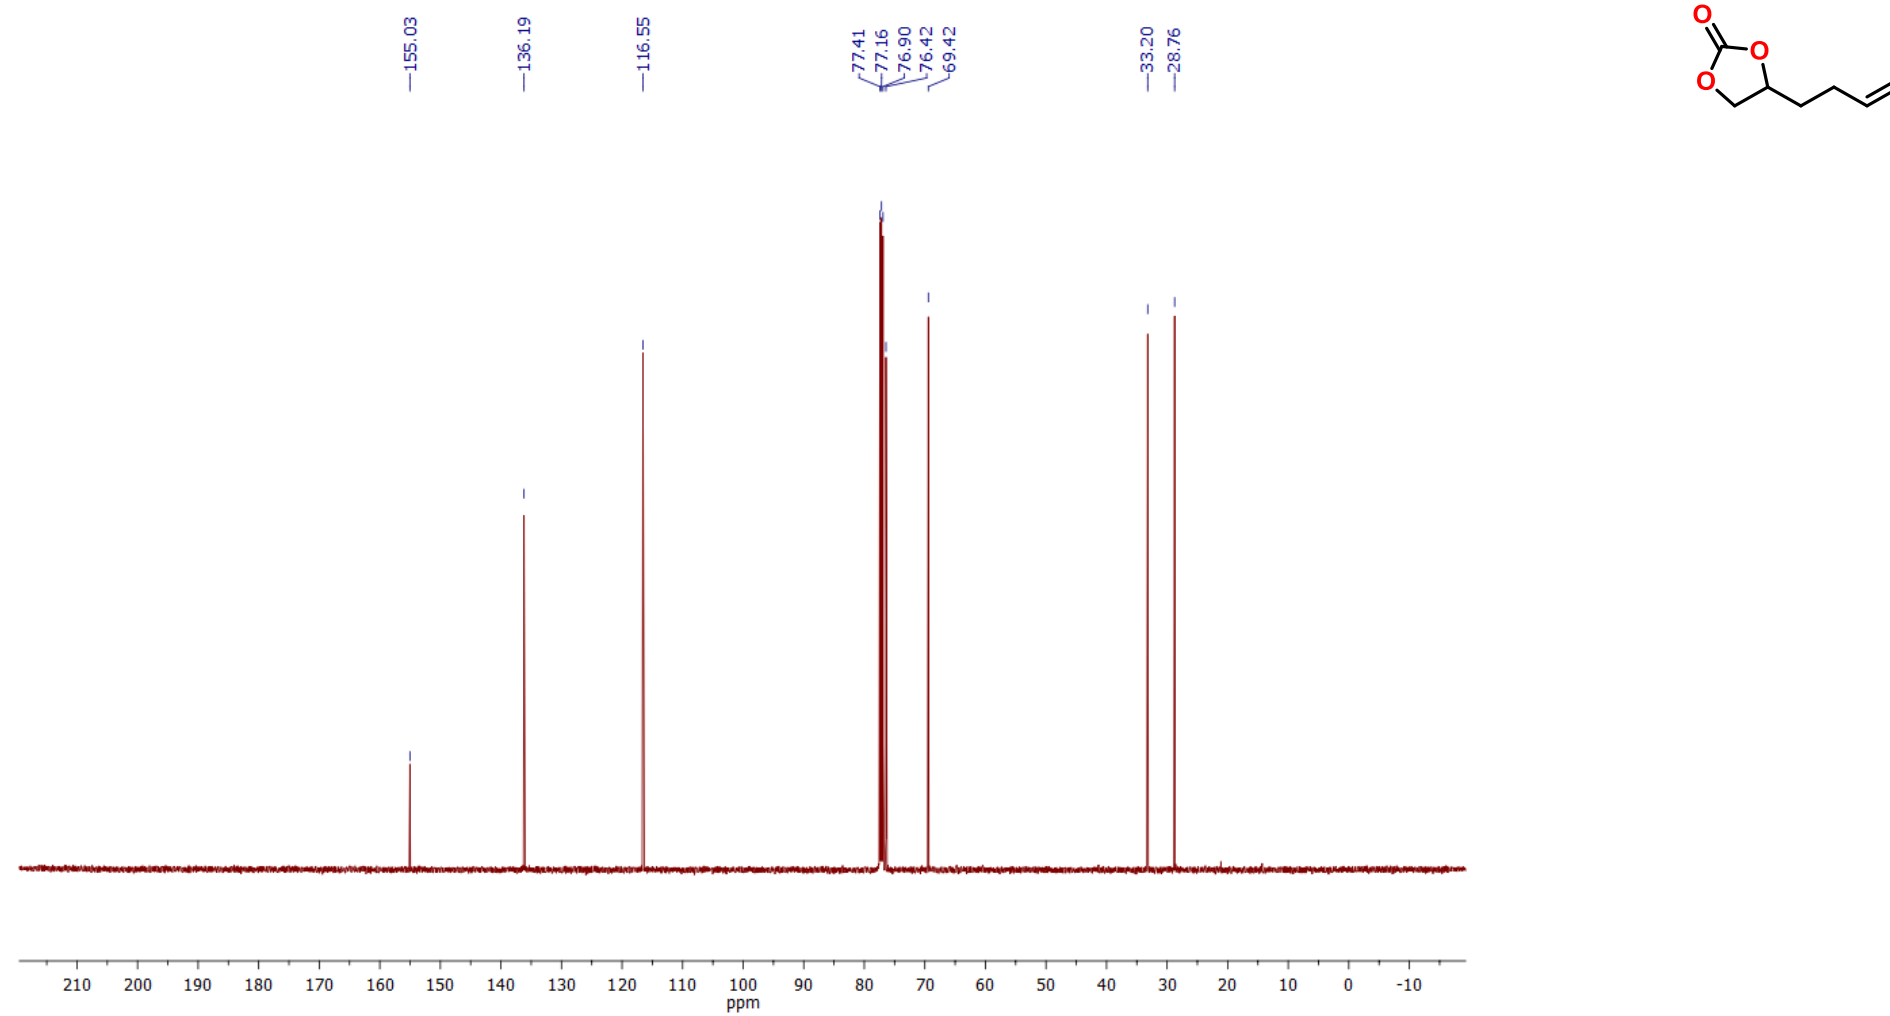

Figure S 44:  $^{13}\text{C}$ -NMR of **5d** in  $\text{CDCl}_3$  at 303 K.

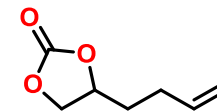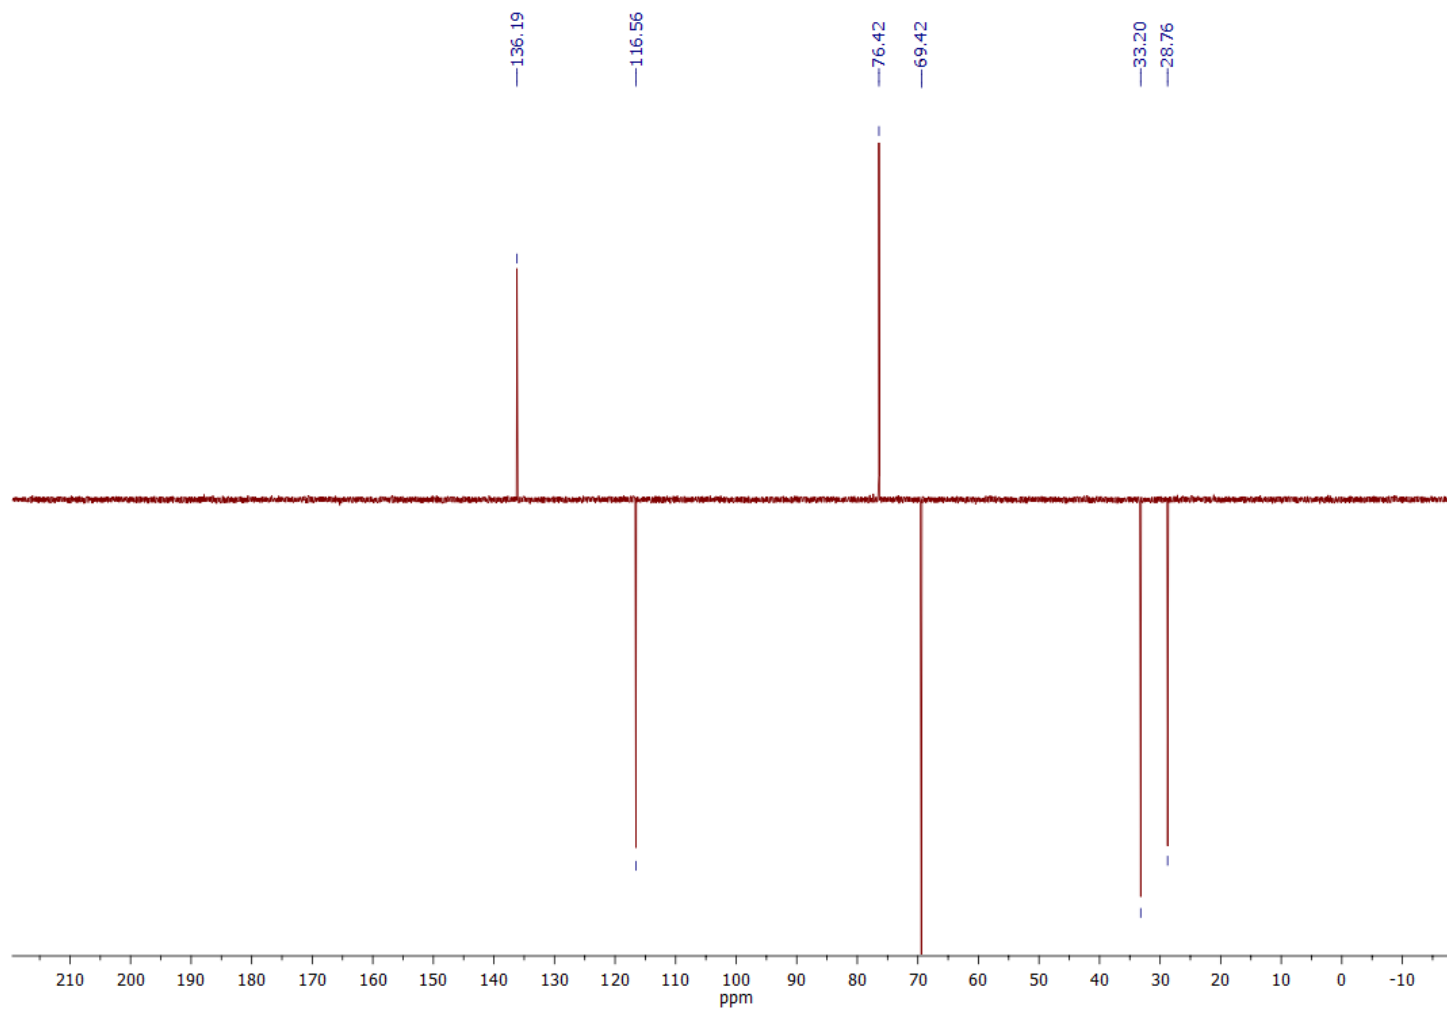

Figure S 45: DEPT135-NMR of **5d** in  $\text{CDCl}_3$  at 303 K.

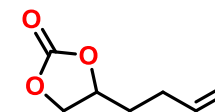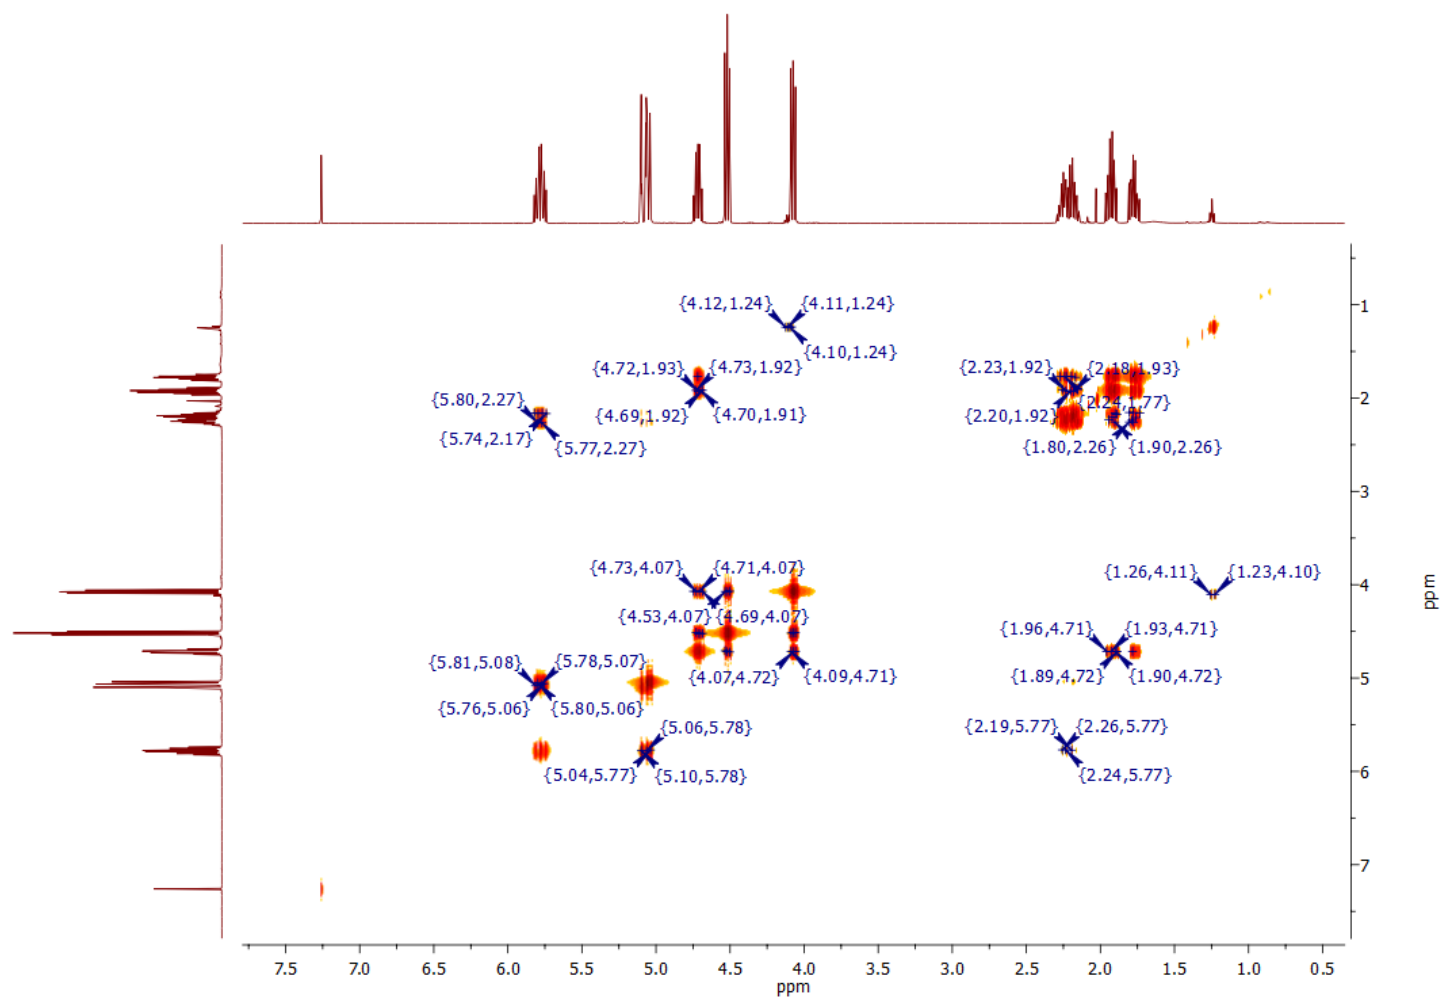

Figure S 46:  $^1\text{H}$ - $^1\text{H}$ -COSY-NMR of **5d** in  $\text{CDCl}_3$  at 303 K.

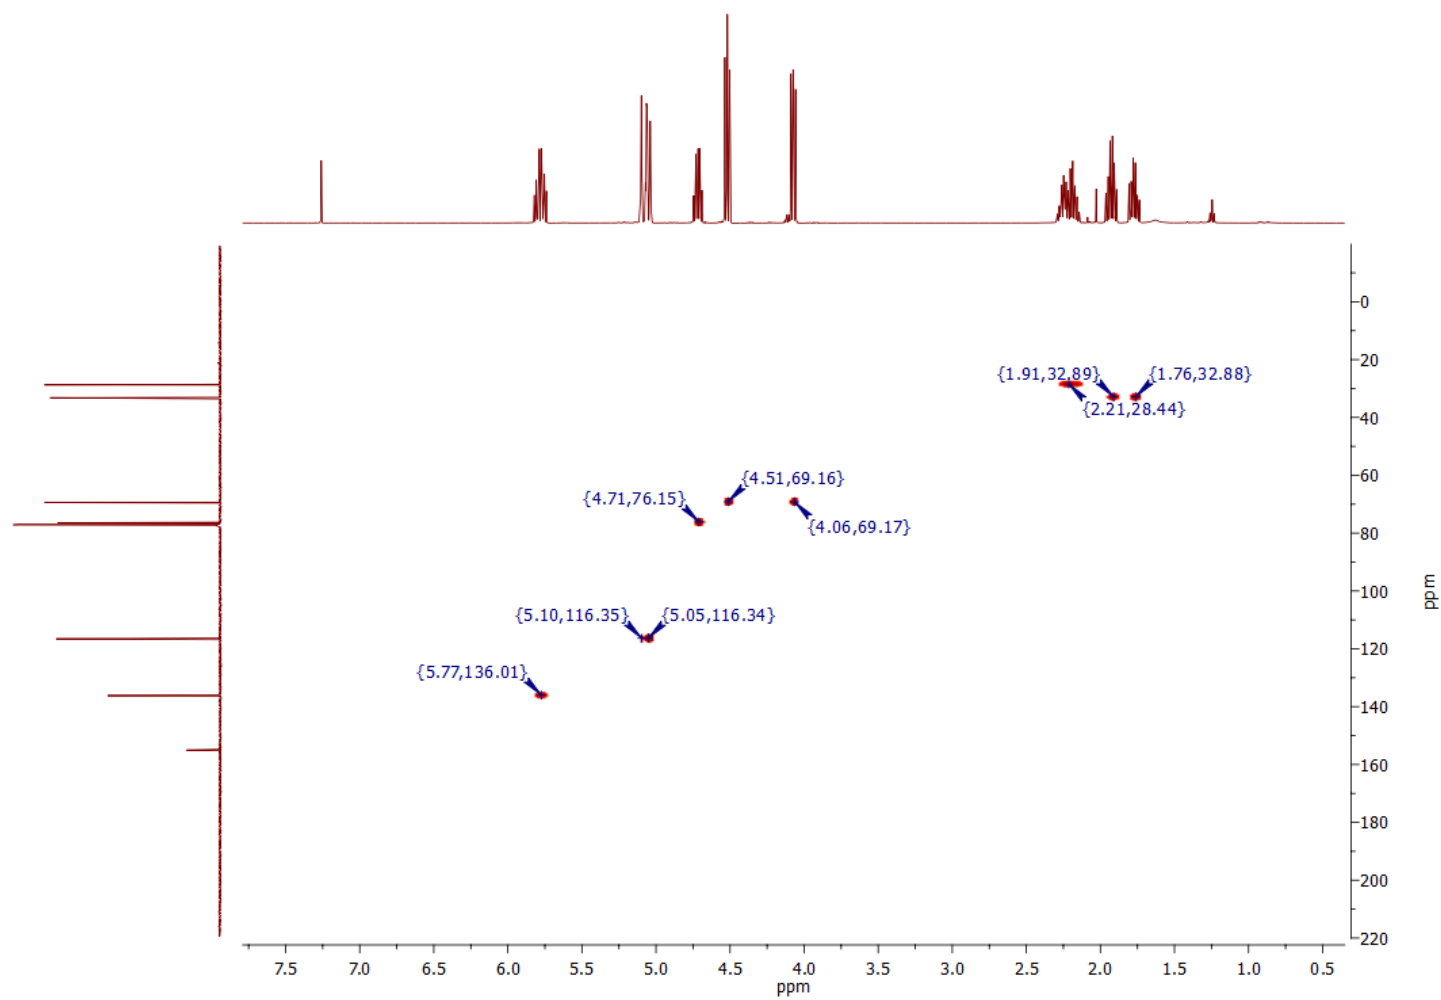

Figure S 47:  $^1\text{H}$ - $^{13}\text{C}$ -HSQC-NMR of **5d** in  $\text{CDCl}_3$  at 303 K.



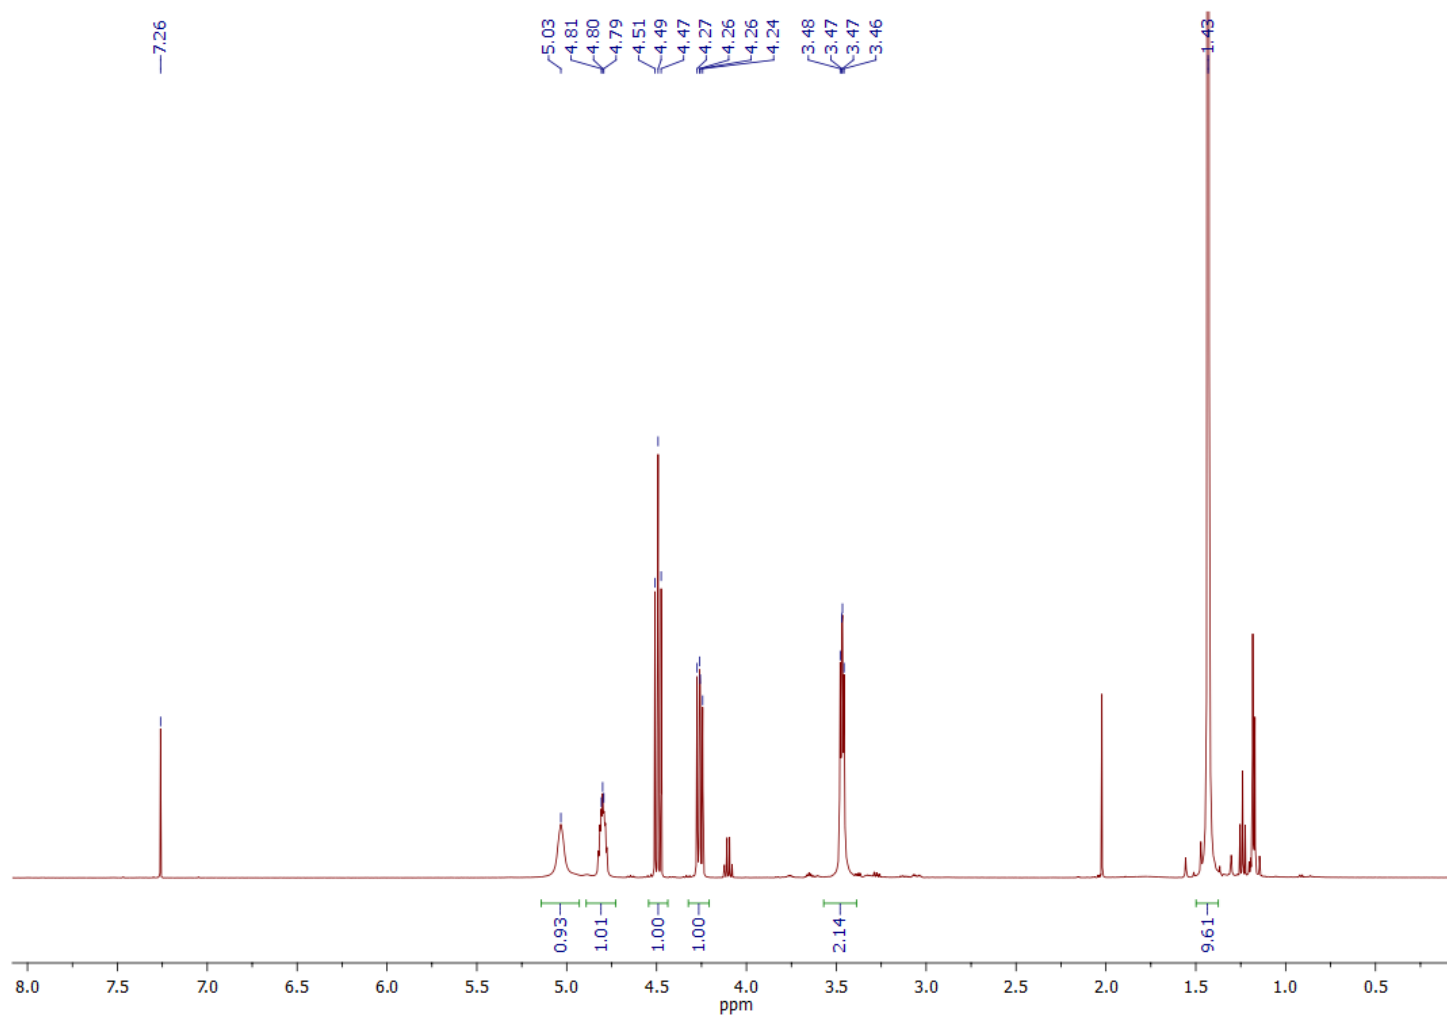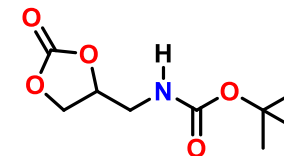

Figure S 48:  $^1\text{H}$ -NMR of **5e** in  $\text{CDCl}_3$  at 303 K. Impurities of cyclohexane and ethyl acetate are present.

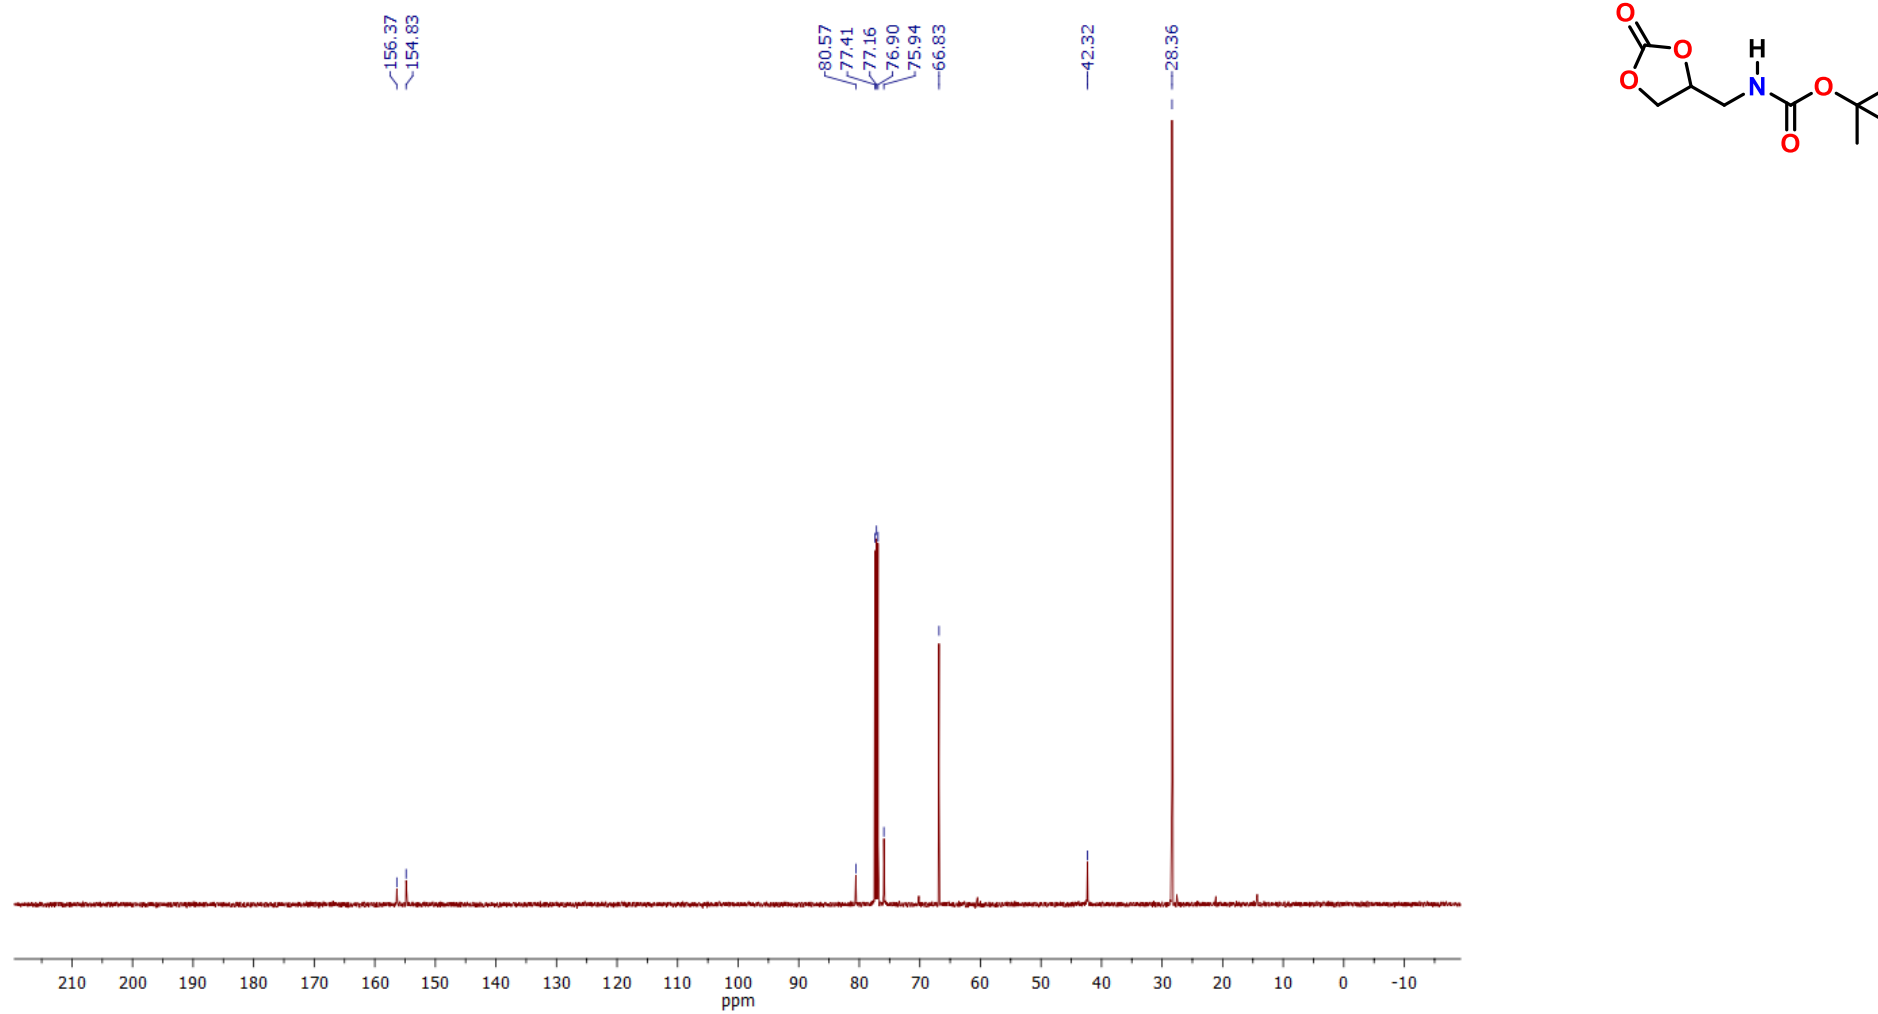

Figure S 49:  $^{13}\text{C}$ -NMR of **5e** in  $\text{CDCl}_3$  at 303 K. Impurities of cyclohexane and ethyl acetate are present.

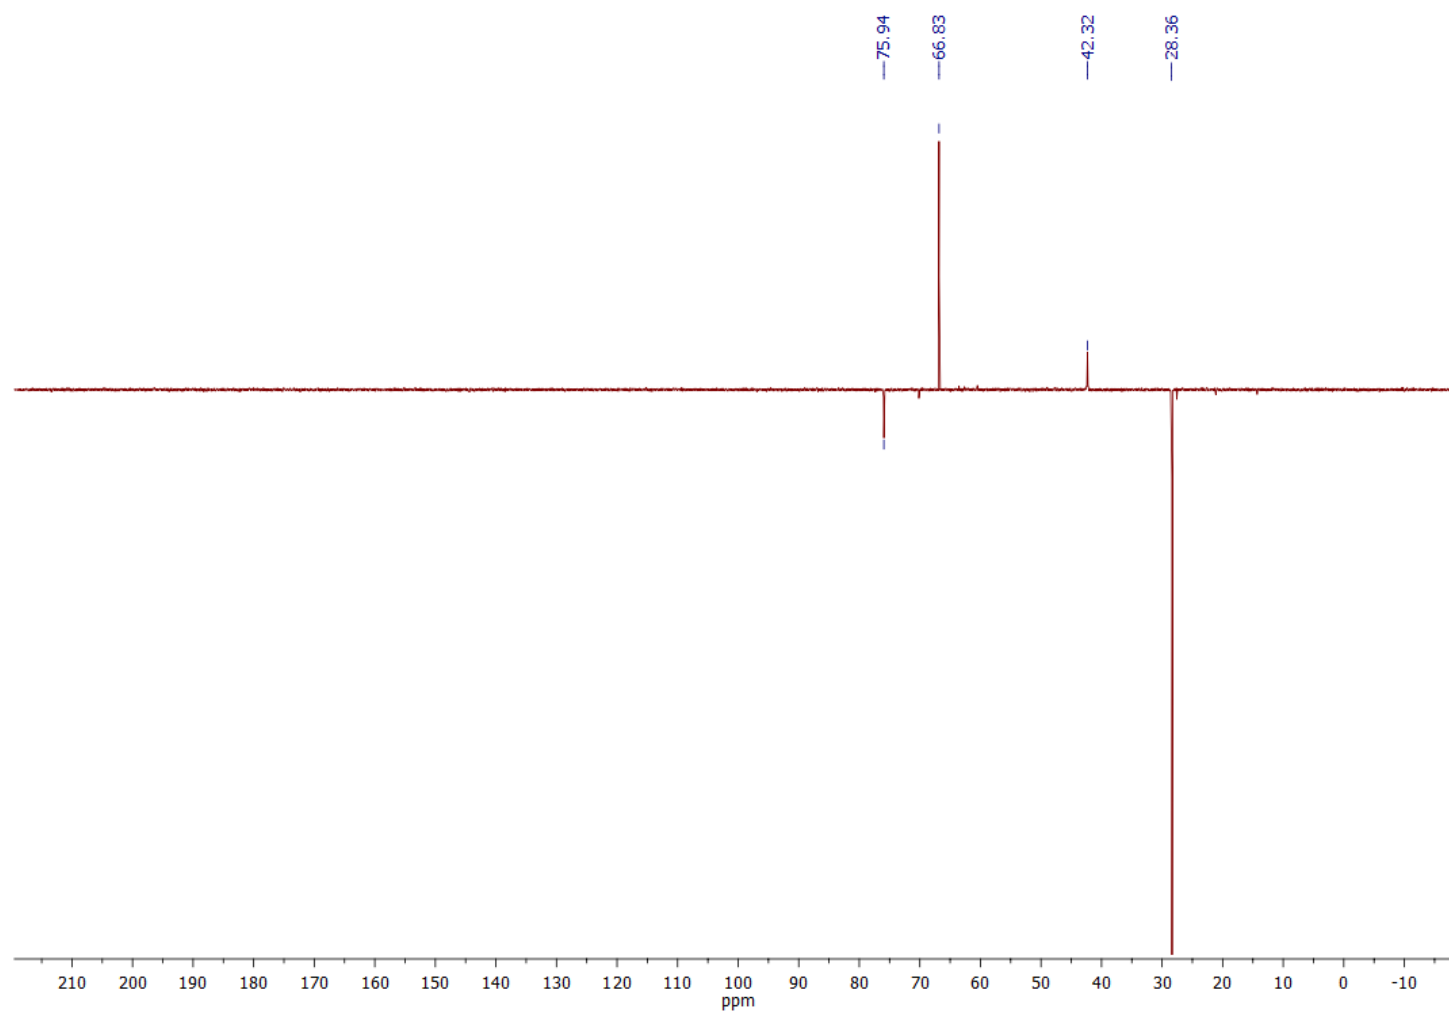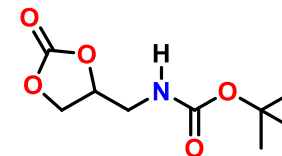

Figure S 50: DEPT135-NMR of **5e** in  $\text{CDCl}_3$  at 303 K. Impurities of cyclohexane and ethyl acetate are present.

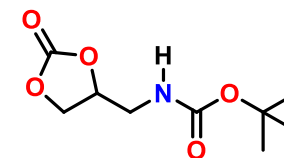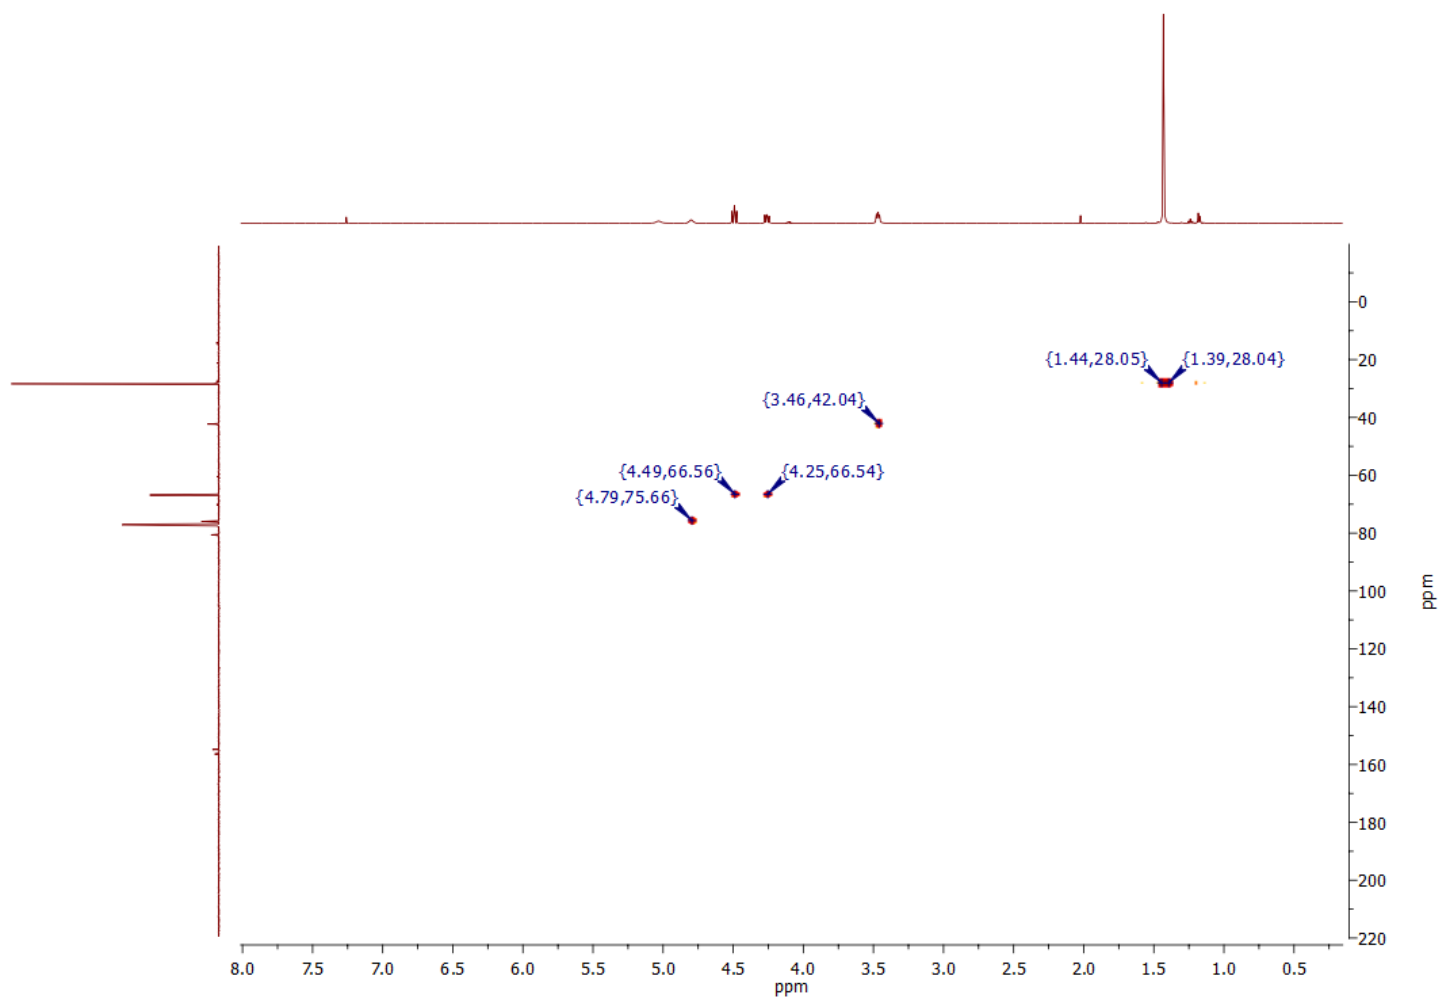

Figure S 51:  $^1\text{H}$ - $^{13}\text{C}$ -HSQC-NMR of **5e** in  $\text{CDCl}_3$  at 303 K.

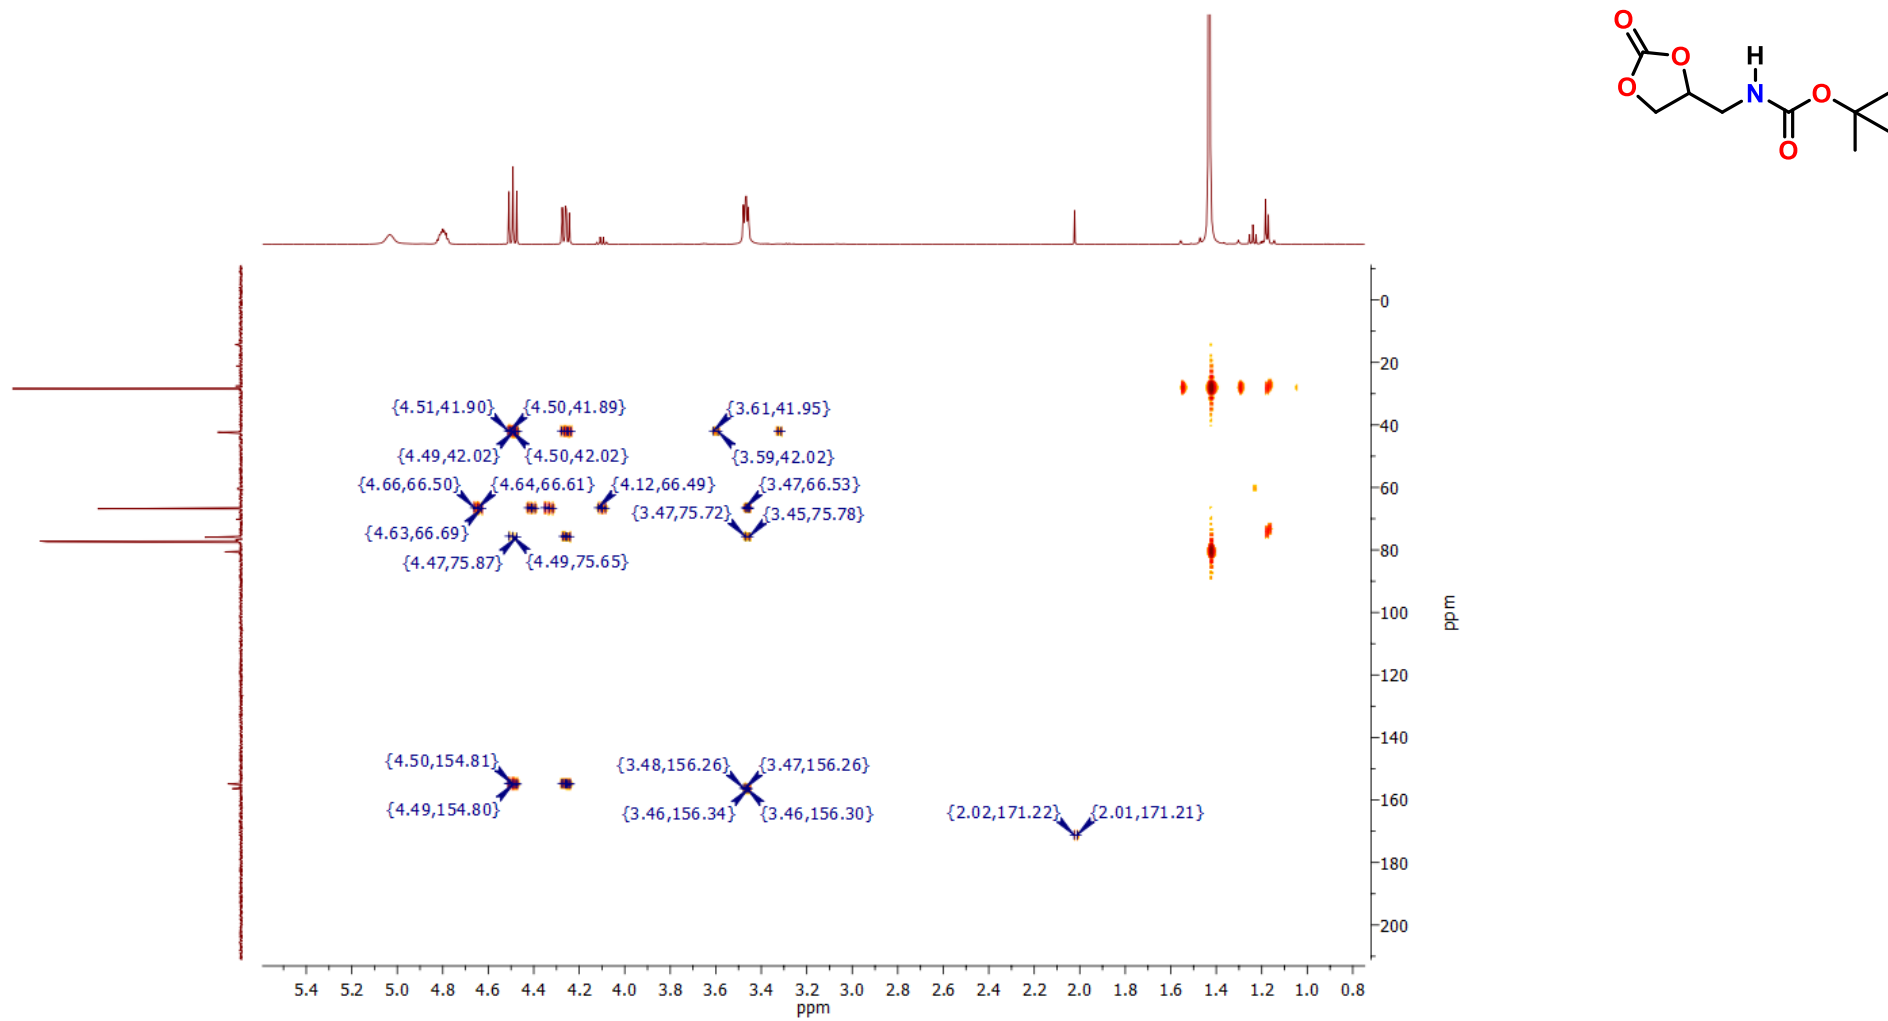

Figure S 52:  $^1\text{H}$ - $^{13}\text{C}$ -HMBC-NMR of 5e in  $\text{CDCl}_3$  at 303 K.

## 2. IR Spectra

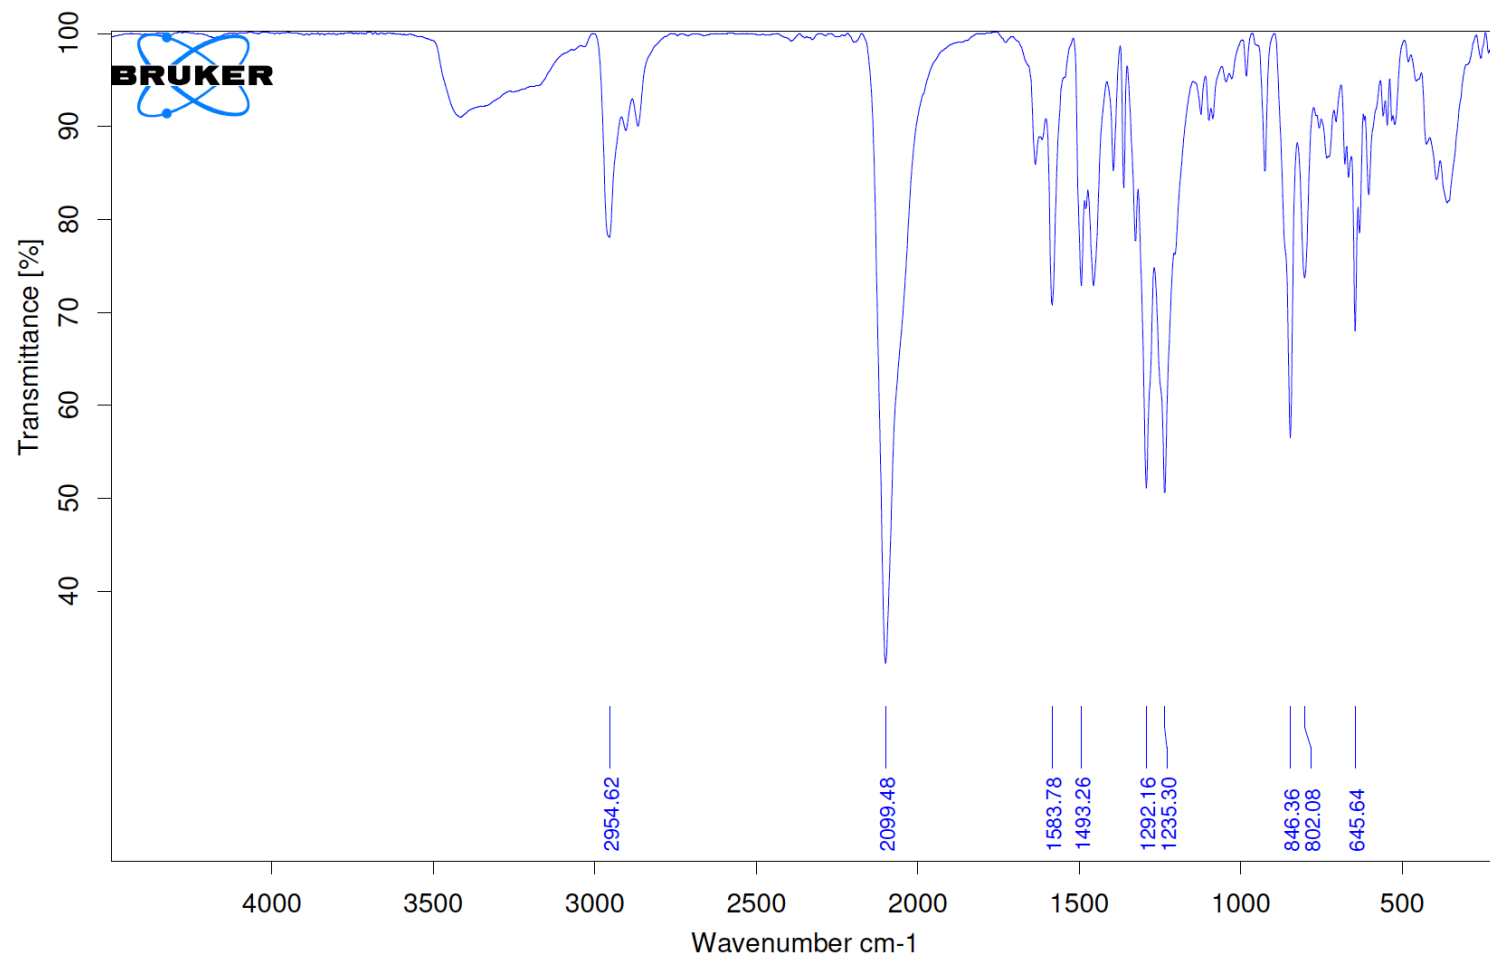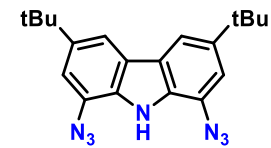

Figure S 53: FT-IR (ATR) of solid 1 at 298 K.

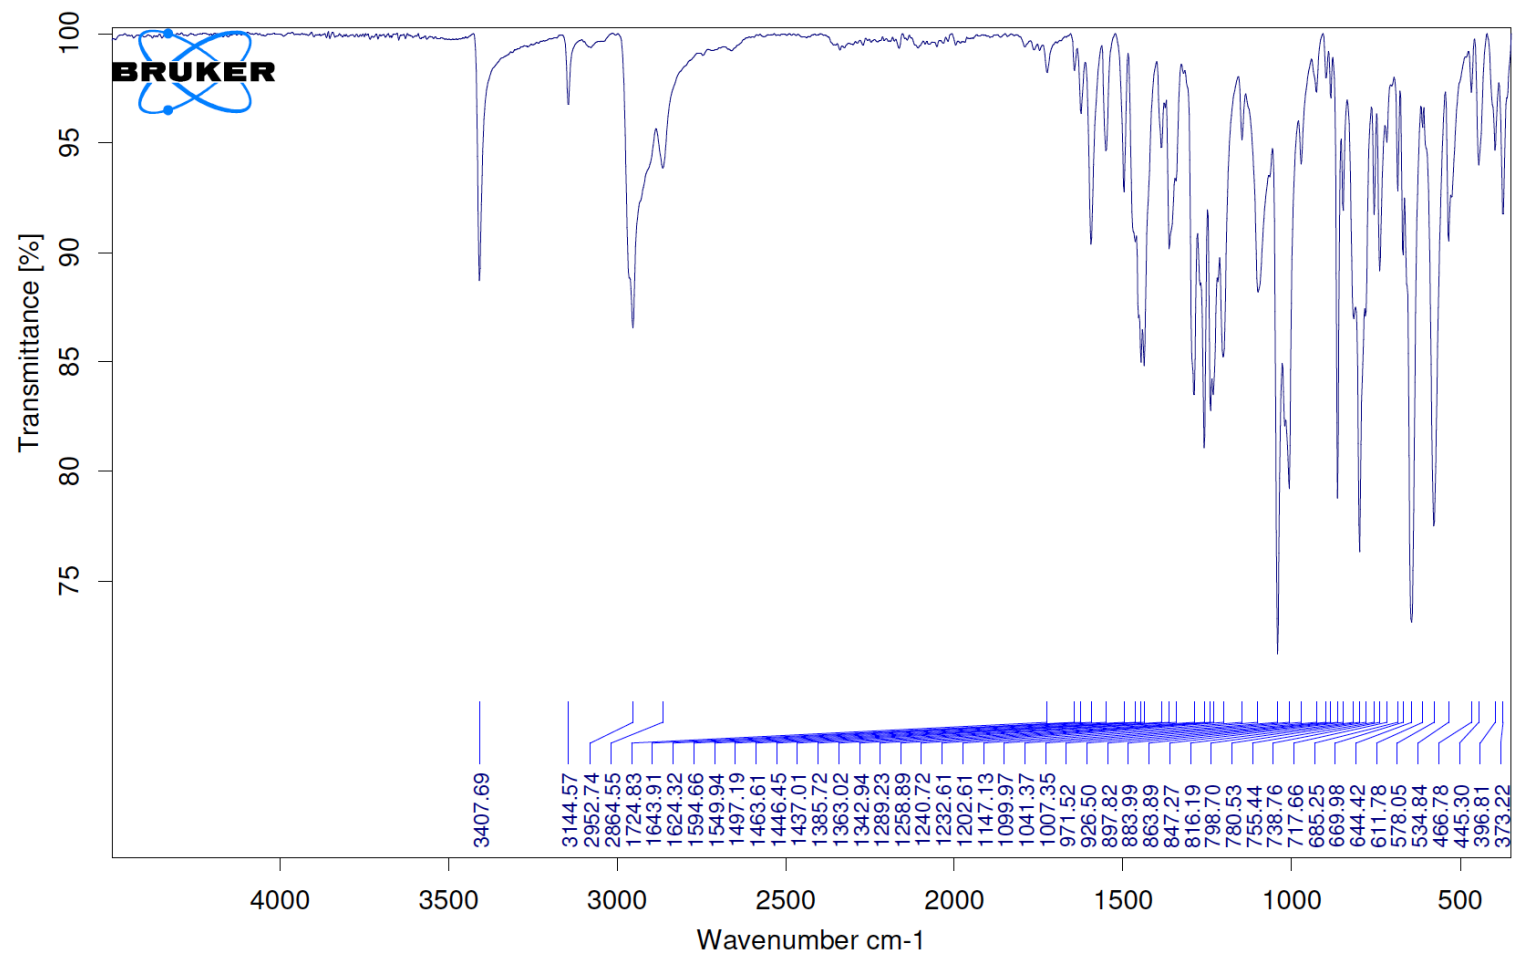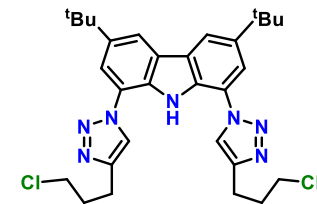

Figure S 54: FT-IR (ATR) of solid **2a** at 298 K.

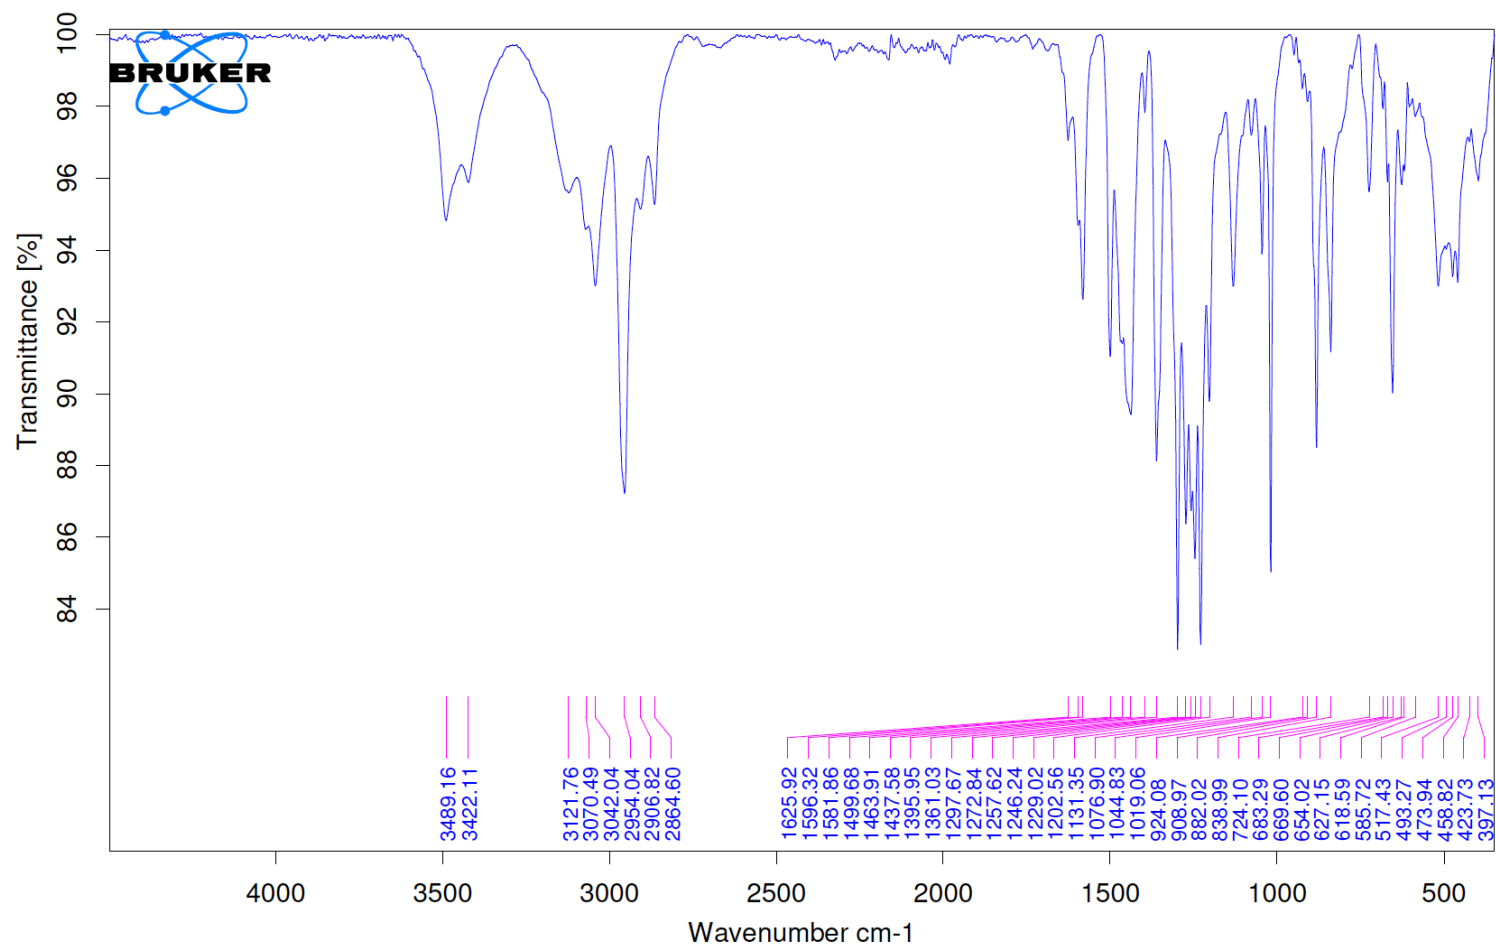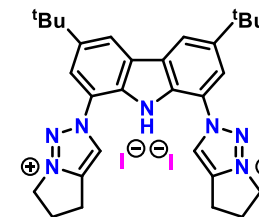

Figure S 55: FT-IR (ATR) of solid **3a** at 298 K.





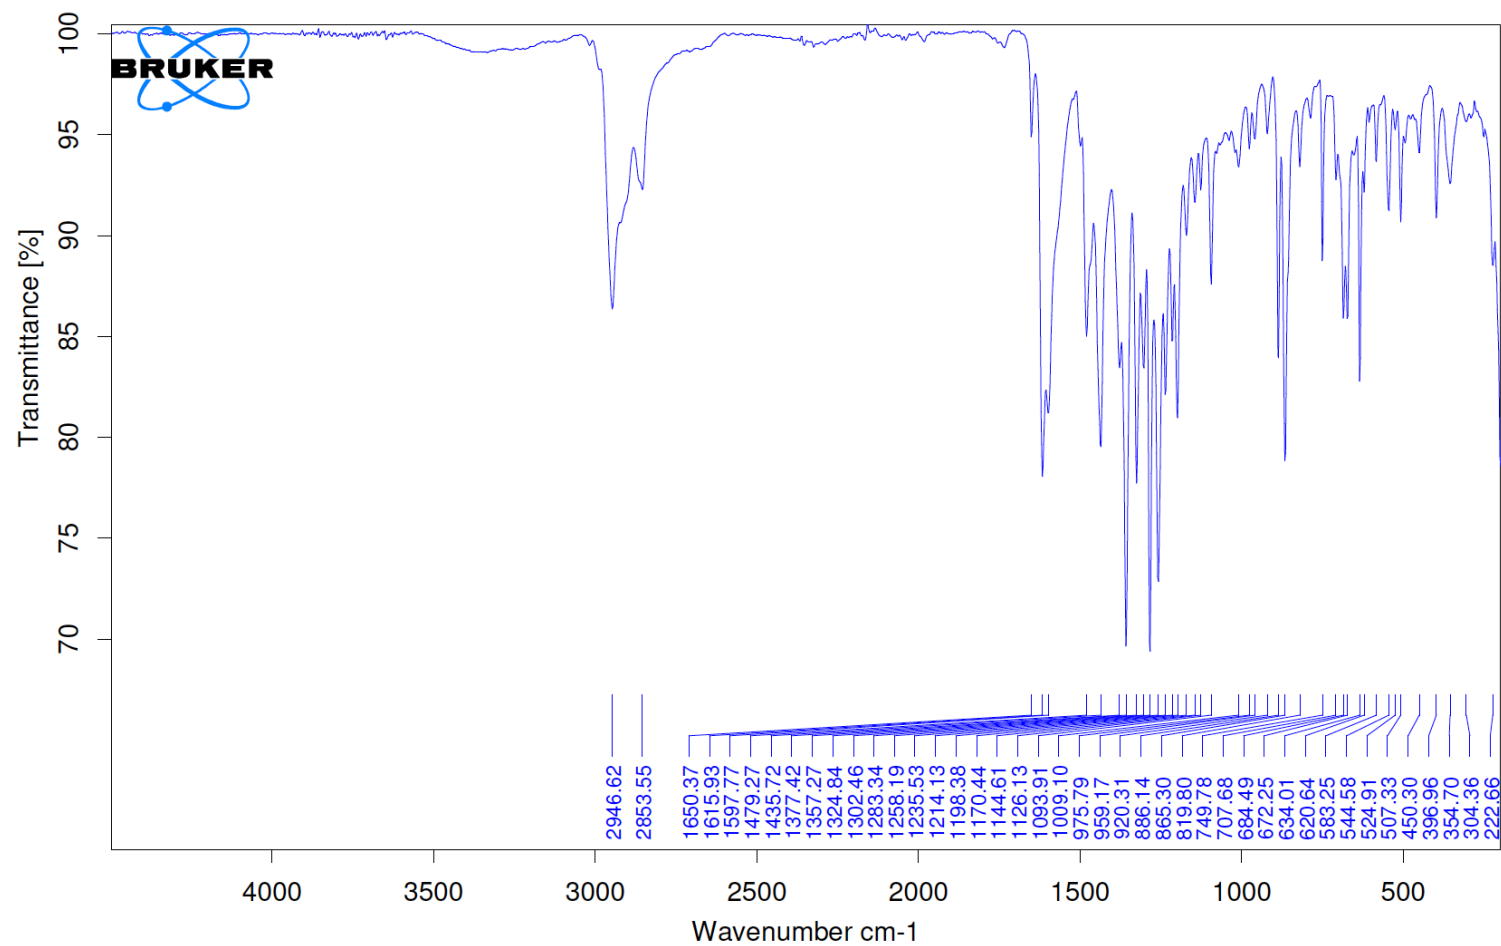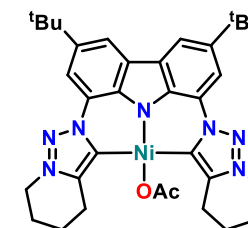

Figure S 57: FT-IR (ATR) of solid **4b** at 298 K.

### 3. Crystallographic details

Table S1: Crystallographic details

|                                     | <b>3a (5 CH<sub>2</sub>Cl<sub>2</sub>)*</b>                                                             | <b>4a (H<sub>2</sub>O)</b>                                                                        | <b>4b (CH<sub>2</sub>Cl<sub>2</sub>)</b>                                                                         |
|-------------------------------------|---------------------------------------------------------------------------------------------------------|---------------------------------------------------------------------------------------------------|------------------------------------------------------------------------------------------------------------------|
| Chemical formula                    | 2 (C <sub>30</sub> H <sub>37</sub> N <sub>7</sub> I <sub>2</sub> )<br>5 CH <sub>2</sub> Cl <sub>2</sub> | C <sub>32</sub> H <sub>37</sub> N <sub>7</sub> O <sub>2</sub> Ni <sub>1</sub><br>H <sub>2</sub> O | C <sub>34</sub> H <sub>41</sub> N <sub>7</sub> O <sub>2</sub> Ni <sub>1</sub><br>CH <sub>2</sub> Cl <sub>2</sub> |
| <i>M<sub>r</sub></i>                | 1923.56                                                                                                 | 628.41                                                                                            | 723.37                                                                                                           |
| Crystal system                      | Triclinic                                                                                               | Triclinic                                                                                         | Triclinic                                                                                                        |
| Space group                         | P-1                                                                                                     | P-1                                                                                               | P-1                                                                                                              |
| a (Å)                               | 11.504(2)                                                                                               | 7.126(2)                                                                                          | 7.5365(4)                                                                                                        |
| b (Å)                               | 17.383(3)                                                                                               | 14.133(3)                                                                                         | 13.8963(7)                                                                                                       |
| c (Å)                               | 22.798(4)                                                                                               | 15.931(3)                                                                                         | 16.4272(9)                                                                                                       |
| α (°)                               | 69.113(3)                                                                                               | 104.37(3)                                                                                         | 86.456(2)                                                                                                        |
| β (°)                               | 85.019(3)                                                                                               | 98.75(2)                                                                                          | 83.953(2)                                                                                                        |
| γ (°)                               | 88.293(3)                                                                                               | 92.59(2)                                                                                          | 78.005(2)                                                                                                        |
| V (Å <sup>3</sup> )                 | 4226.6(1)                                                                                               | 1530.4(6)                                                                                         | 1672.1(2)                                                                                                        |
| Z                                   | 2                                                                                                       | 2                                                                                                 | 2                                                                                                                |
| Density (g cm <sup>-3</sup> )       | 1.511                                                                                                   | 1.364                                                                                             | 1.437                                                                                                            |
| F(000)                              | 1908                                                                                                    | 664                                                                                               | 760                                                                                                              |
| Radiation Type                      | MoK <sub>α</sub>                                                                                        | MoK <sub>α</sub>                                                                                  | MoK <sub>α</sub>                                                                                                 |
| μ (mm)                              | 1.835                                                                                                   | 0.679                                                                                             | 0.784                                                                                                            |
| Crystal size                        | 0.2x0.15x0.13                                                                                           | 0.14x0.13x0.09                                                                                    | 0.20x0.19x0.09                                                                                                   |
| Meas. Refl.                         | 35126                                                                                                   | 25007                                                                                             | 23936                                                                                                            |
| Indep. Refl.                        | 15512                                                                                                   | 6766                                                                                              | 6784                                                                                                             |
| Obsvd. [ <i>I</i> > 2σ( <i>I</i> )] | 11549                                                                                                   | 5338                                                                                              | 6519                                                                                                             |
| R <sub>int</sub>                    | 0.0407                                                                                                  | 0.0460                                                                                            | 0.0351                                                                                                           |
| R [all data]                        | 0.0722                                                                                                  | 0.0405                                                                                            | 0.0282                                                                                                           |
| wR(F <sup>2</sup> )                 | 0.2154                                                                                                  | 0.1017                                                                                            | 0.0722                                                                                                           |
| S                                   | 1.029                                                                                                   | 1.040                                                                                             | 1.031                                                                                                            |
| Δρ <sub>max</sub>                   | 3.022                                                                                                   | 0.761                                                                                             | 0.353                                                                                                            |
| Δρ <sub>min</sub>                   | -2.034                                                                                                  | -0.351                                                                                            | -0.426                                                                                                           |
| CCDC                                | 1996487                                                                                                 | 1996486                                                                                           | 1996485                                                                                                          |

\*The DCM molecules were partly heavily disordered wherefore we applied the SQUEEZE algorithm. <sup>1</sup>

Table S2: Selected bond lengths and angles

|            | <b>3a (5 CH<sub>2</sub>Cl<sub>2</sub>)</b> | <b>4a (H<sub>2</sub>O)</b> | <b>4b (CH<sub>2</sub>Cl<sub>2</sub>)</b> |
|------------|--------------------------------------------|----------------------------|------------------------------------------|
| Ni1-N10    | -                                          | 1.854(2)                   | 1.861(2)                                 |
| Ni1-C1     | -                                          | 1.947(2)                   | 1.943(2)                                 |
| Ni1-C2     | -                                          | 1.945(2)                   | 1.931(2)                                 |
| Ni1-O1     | -                                          | 1.880(2)                   | 1.878(1)                                 |
| N10-C11    | 1.38(1)                                    | 1.391(3)                   | -                                        |
| N10-C13    | -                                          | -                          | 1.376(2)                                 |
| C11-C16    | 1.38(1)                                    | 1.394(3)                   | -                                        |
| C13-C18    | -                                          | -                          | 1.392(2)                                 |
| C16-N1     | 1.45(1)                                    | 1.425(3)                   | -                                        |
| C18-N1     | -                                          | -                          | 1.424(2)                                 |
| N1-N3      | 1.33(1)                                    | 1.348(2)                   | 1.338(2)                                 |
| N3-N5      | 1.30(1)                                    | 1.312(2)                   | 1.318(2)                                 |
| N5-C3      | 1.33(2)                                    | 1.351(3)                   | 1.360(2)                                 |
| C3-C1      | 1.36(1)                                    | 1.396(3)                   | 1.409(3)                                 |
| C1-N1      | 1.34(1)                                    | 1.391(3)                   | 1.384(1)                                 |
| N10-C17    | 1.37(1)                                    | 1.384(3)                   | -                                        |
| N10-C19    | -                                          | -                          | 1.379(2)                                 |
| C17-C22    | 1.39(1)                                    | 1.396(2)                   | -                                        |
| C19-C24    | -                                          | -                          | 1.394(3)                                 |
| C22-N2     | 1.43(1)                                    | 1.420(3)                   | -                                        |
| C24-N2     | -                                          | -                          | 1.425(2)                                 |
| N2-N4      | 1.33(1)                                    | 1.354(2)                   | 1.340(2)                                 |
| N4-N6      | 1.32(1)                                    | 1.311(2)                   | 1.325(2)                                 |
| N6-C4      | 1.34(1)                                    | 1.344(3)                   | 1.359(2)                                 |
| C4-C2      | 1.36(1)                                    | 1.403(3)                   | 1.394(3)                                 |
| C2-N2      | 1.37(1)                                    | 1.391(3)                   | 1.382(2)                                 |
| C1-Ni1-C2  | -                                          | 176.30(9)                  | 173.39(7)                                |
| N10-Ni1-O1 | -                                          | 175.44(7)                  | 176.11(7)                                |

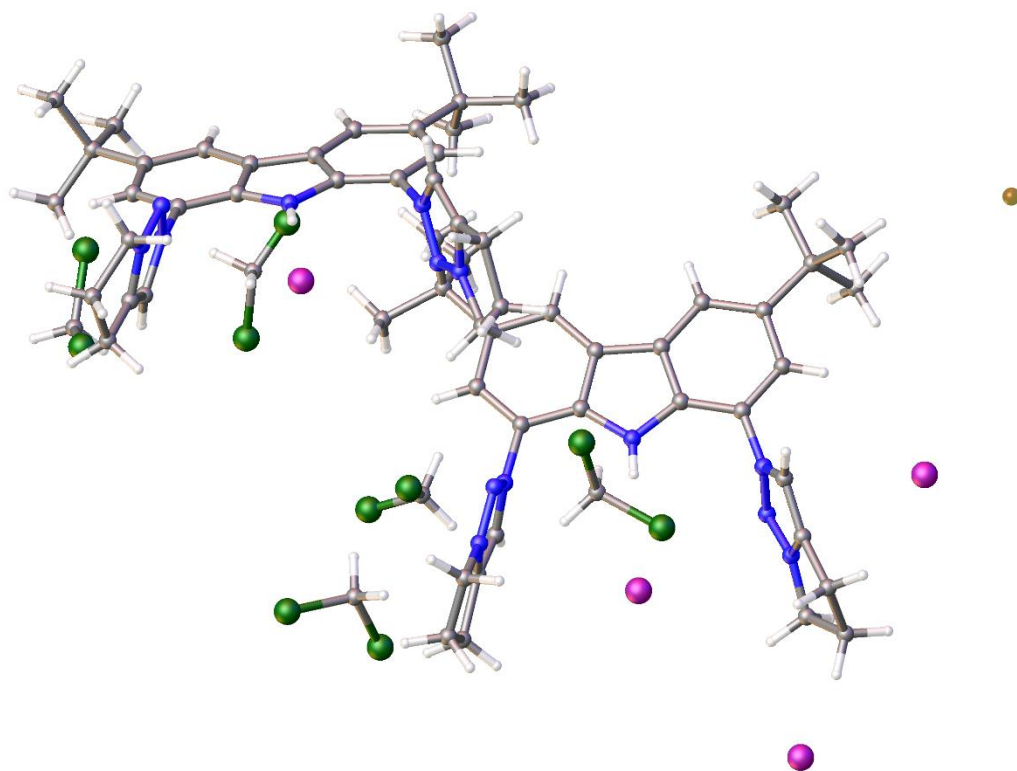

Figure S 58: Solid state structure of **3a** including solvent molecules and counter ions before the SQUEEZE algorithm was applied.

Due to slight unresolvable disorders, three atoms (in a DCM, a 5-membered ring and a <sup>t</sup>Bu group) has to be restrained using ISOR 0.001 instructions.

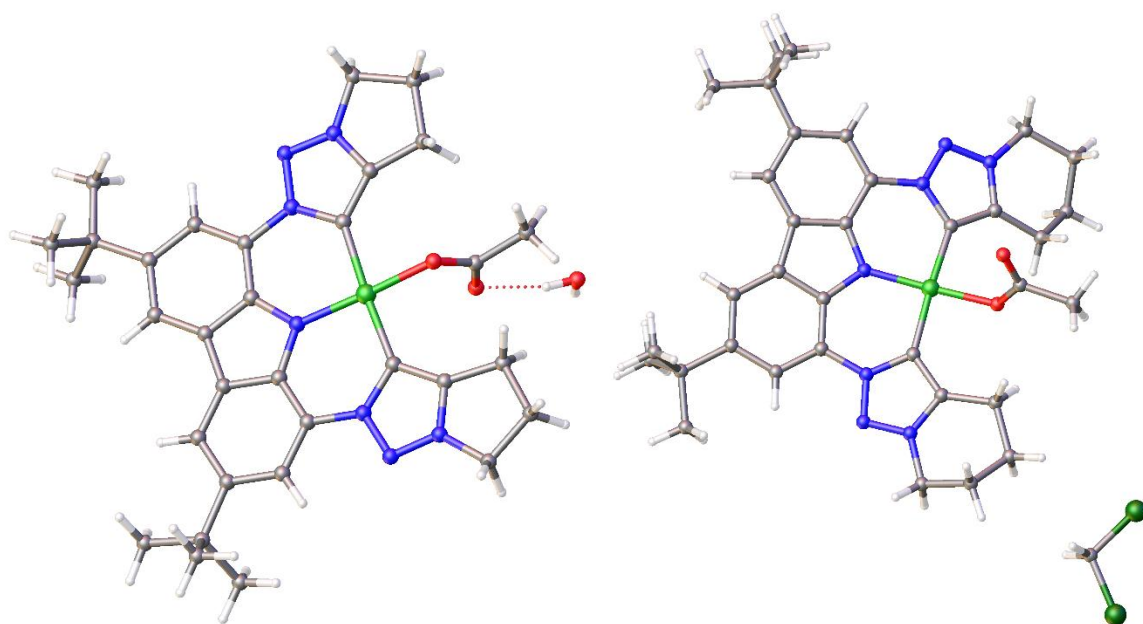

Figure S 59: Solid state structure of **4a** (left) and **4b** (right) including solvent molecules, hydrogen atoms and counter ions. Hydrogen bonding is indicated by dotted red lines.

## 4. Literature

- 1 A. L. Spek, *Acta crystallographica. Section C, Structural chemistry*, 2015, **71**, 9–18.

### Author Contributions

The project was designed by SH. Ligand and metal complex synthesis was carried out by FAW, ND and SH. Catalytic experiments were carried out by BS. Xray structures were solved by RS, RHI, HO and SH. The manuscript was written by SH, JP and DK and proof-read by all authors.
